# Supplementary material for: Synthesis and antiproliferative potency of 1,3,4-thiadiazole and 1,3-thiazolidine-4-one based new binary heterocyclic molecules: in vitro cell-based anticancer studies
Source: Royal Society of Chemistry journal article supplement (doi:10.1039/d4md00279b), 2024-01-01
Supplement: d4md00279b1.pdf [file d4md00279b1.pdf]

**Synthesis and antiproliferative potency of 1,3,4-thiadiazole and 1,3-thiazolidine-4-one based new binary heterocyclic molecules: *in vitro* cell-based anticancer studies**

Avik Maji<sup>a</sup>, Ambati Himaja<sup>b</sup>, Sripathi Nikhitha<sup>b</sup>, Soumitra Rana<sup>c</sup>, Abhik Paul<sup>a</sup>, Ajeya Samanta<sup>a</sup>, Uday Shee<sup>d</sup>, Chhanda Mukhopadhyay<sup>c</sup>, Balaram Ghosh<sup>b\*</sup>, Tapan Kumar Maity<sup>a\*</sup>

<sup>a</sup> *Synthetic and Natural Products Research Laboratory, Department of Pharmaceutical Technology, Jadavpur University, Kolkata-700032, West Bengal, India*

<sup>b</sup> *Epigenetic Research Laboratory, Department of Pharmacy, Birla Institute of Technology and Science-Pilani, Hyderabad Campus, Hyderabad-500078, India*

<sup>c</sup> *Department of Chemistry, University of Calcutta, Kolkata - 700009, West Bengal, India*

<sup>d</sup> *Department of Chemistry, Jadavpur University, Kolkata - 700032, West Bengal, India*

**\*Corresponding authors:**

**Prof. (Dr.) Tapan Kumar Maity**

Synthetic and Natural Products Research Laboratory, Department of Pharmaceutical Technology, Jadavpur University, West Bengal, Kolkata-700032, India.

**Orchid:** <https://orcid.org/0000-0002-3245-7297>

**E-mail:** [tapan.maity@jadavpuruniversity.in](mailto:tapan.maity@jadavpuruniversity.in)

**Prof. (Dr.) Balaram Ghosh**

Epigenetic Research Laboratory, Department of Pharmacy, Birla Institute of Technology and Science-Pilani, Hyderabad Campus, Hyderabad-500078, India.

**Orchid:** <https://orcid.org/0000-0002-3425-2439>

**E-mail:** [balaram@hyderabad.bits-pilani.ac.in](mailto:balaram@hyderabad.bits-pilani.ac.in)

## CONTENTS:

| <b>Copy of Spectral data.</b>                                                | <b><u>Pages</u></b> |
|------------------------------------------------------------------------------|---------------------|
| 1. <sup>1</sup> H NMR, <sup>13</sup> C NMR and <sup>19</sup> F NMR data..... | S3-S39              |
| 2. HRMS data for the final compounds.....                                    | S40-S43             |

### **X-Ray Crystallographic data:**

|                                                                  |     |
|------------------------------------------------------------------|-----|
| 1. Molecular geometry of compounds <b>6g</b> and <b>7f</b> ..... | S44 |
| 2. Tabular data of crystal.....                                  | S45 |

### **Biological assay data:**

|                                                                                                                                                    |     |
|----------------------------------------------------------------------------------------------------------------------------------------------------|-----|
| 1. Dose-response curve of compounds series ( <b>5a-g</b> , <b>6a-g</b> and <b>7a-g</b> ) on various cancer cell lines generated via MTT assay..... | S46 |
|----------------------------------------------------------------------------------------------------------------------------------------------------|-----|

# Copy of $^1\text{H}$ , $^{13}\text{C}$ and $^{19}\text{F}$ NMR data:

Compd 1

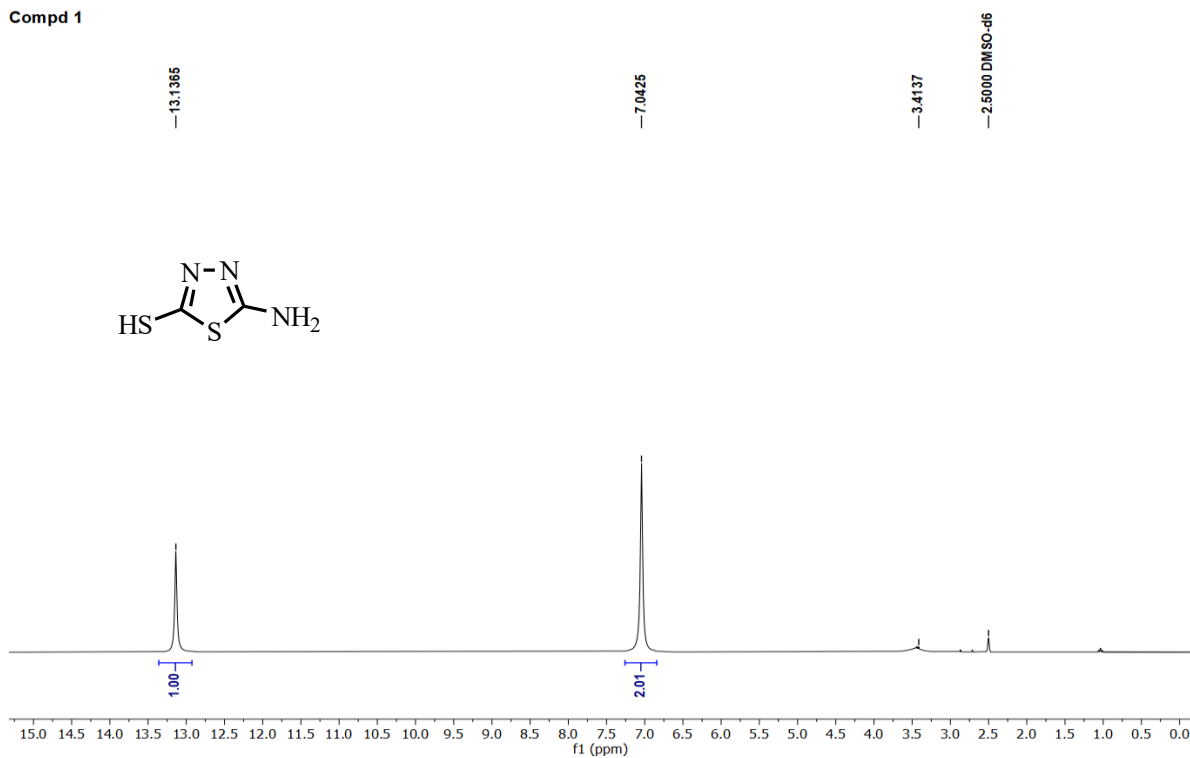

S.F1':  $^1\text{H}$  NMR of compound 1

1

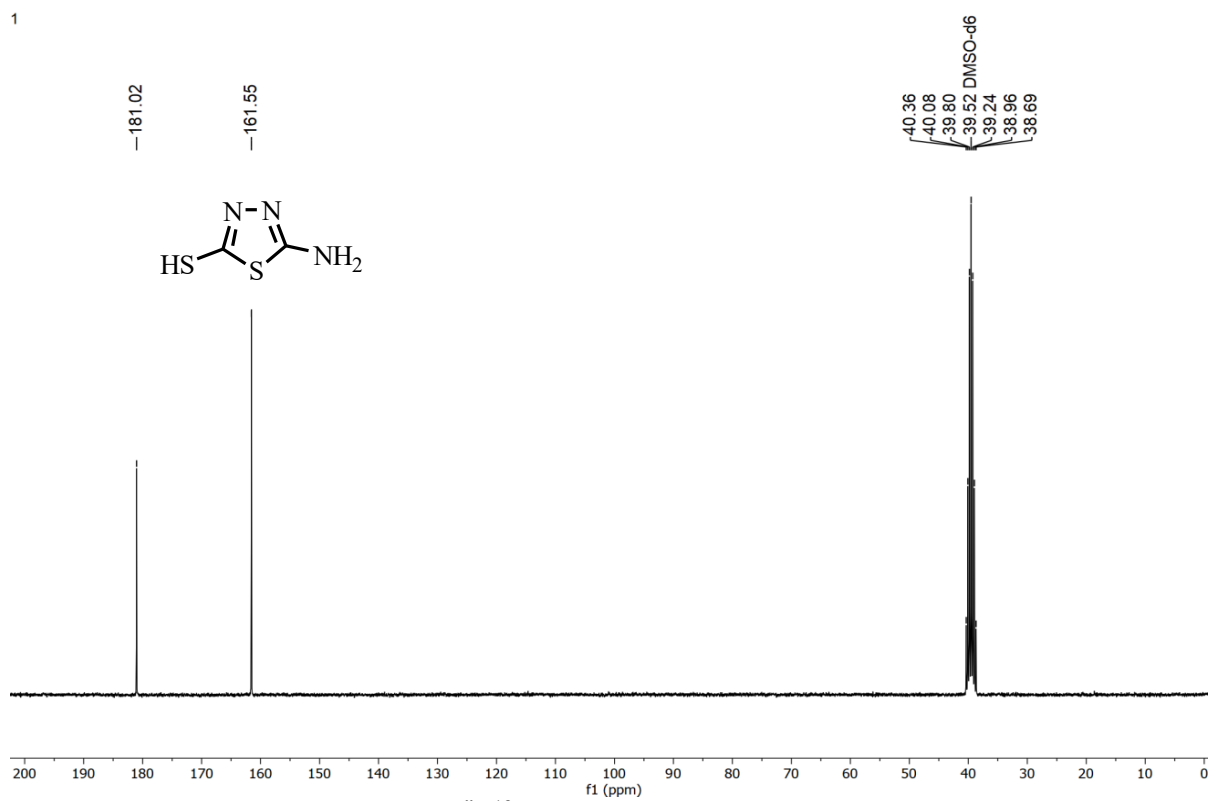

S.F1'':  $^{13}\text{C}$  NMR of compound 1

2

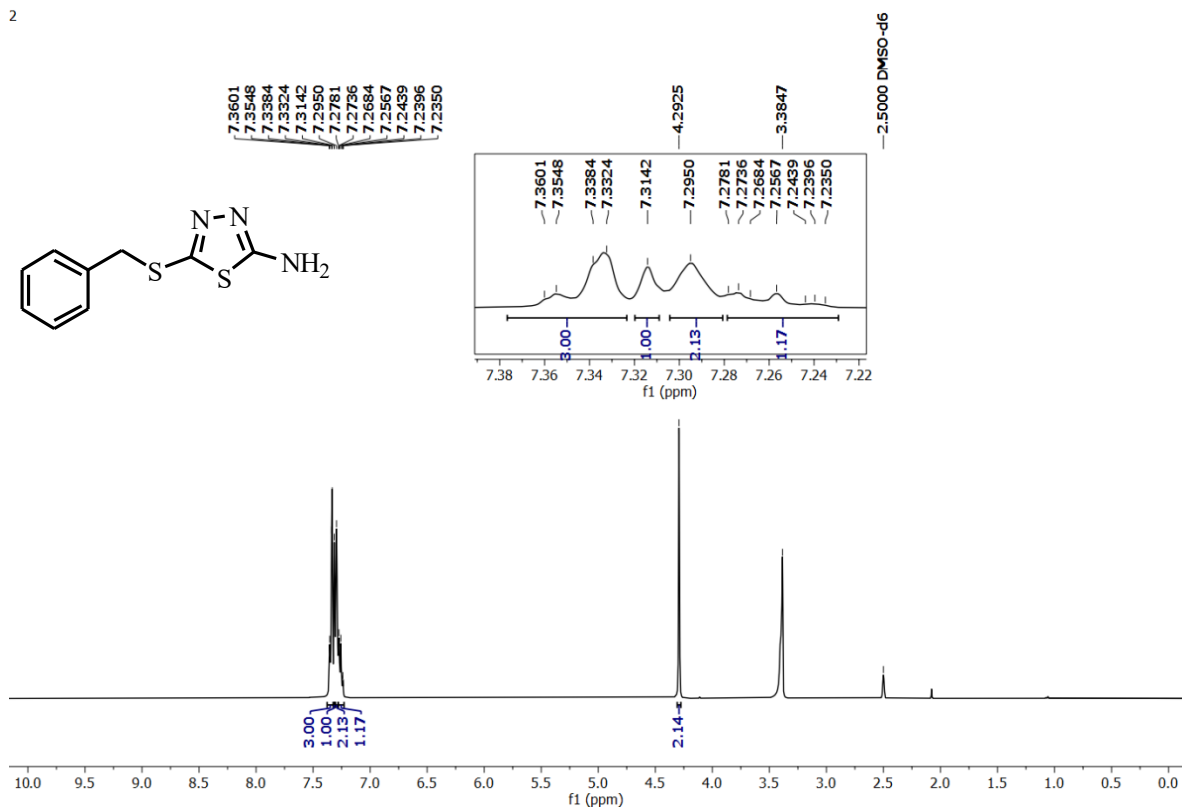S.F2': <sup>1</sup>H NMR of compound 2a

2

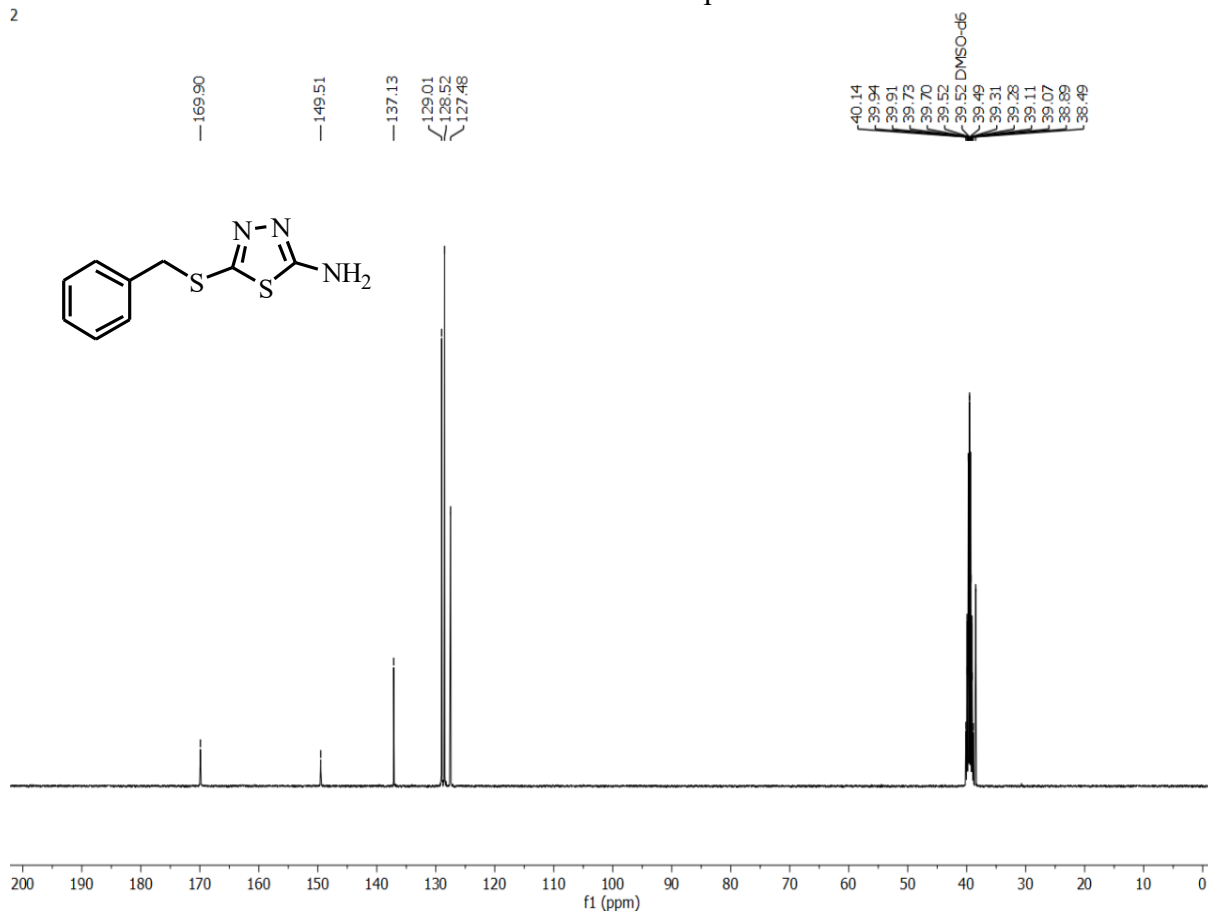S.F2'': <sup>13</sup>C NMR of compound 2a

2b

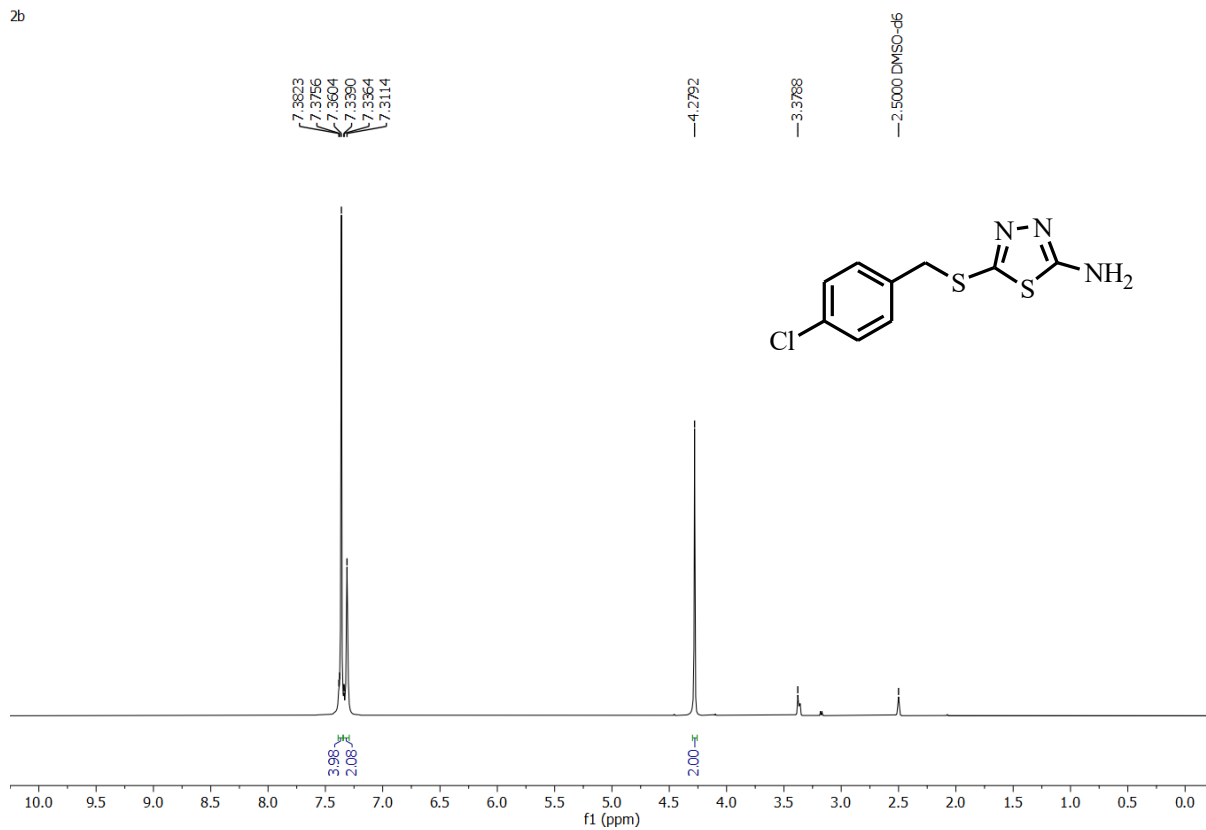S.F3':  $^1\text{H NMR}$  of compound 2b

2b

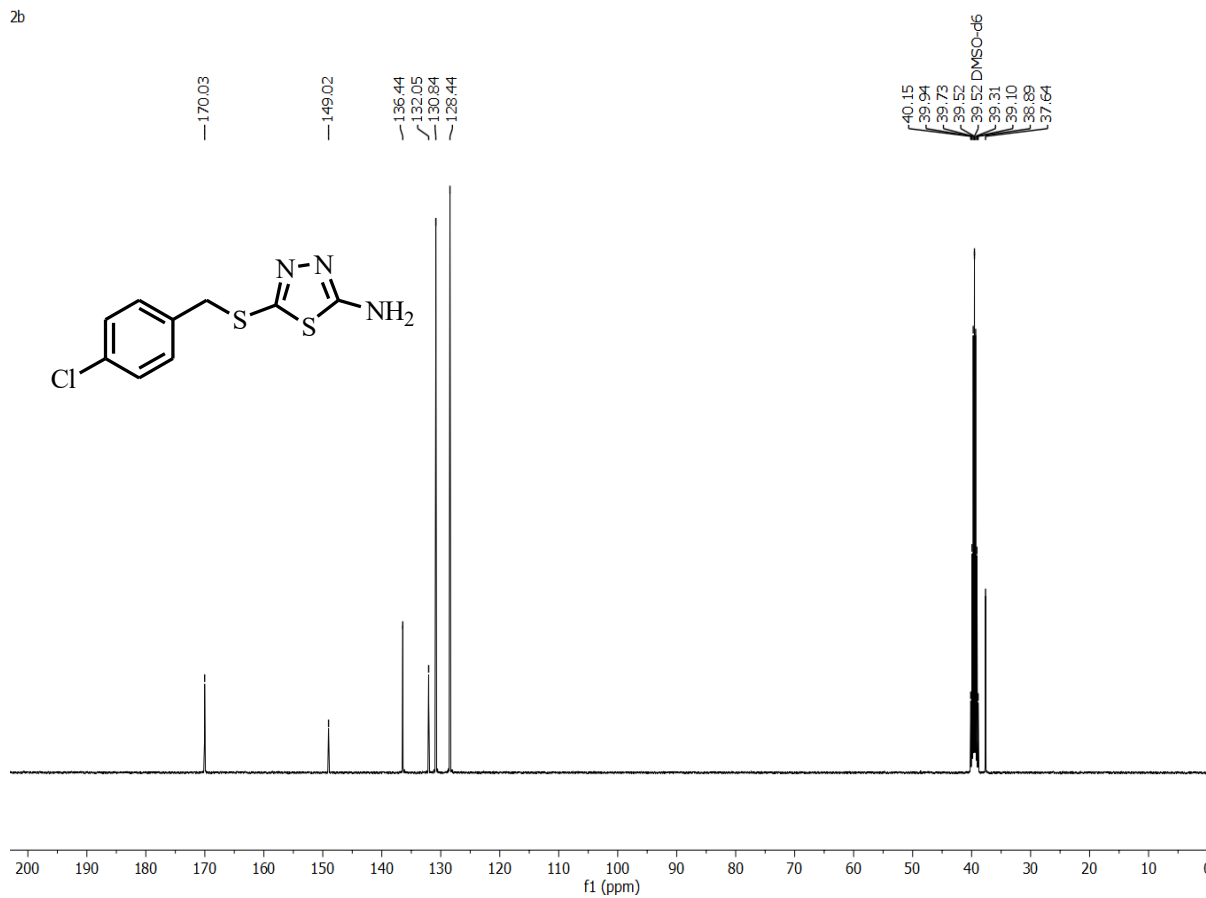S.F3'':  $^{13}\text{C NMR}$  of compound 2b

2c

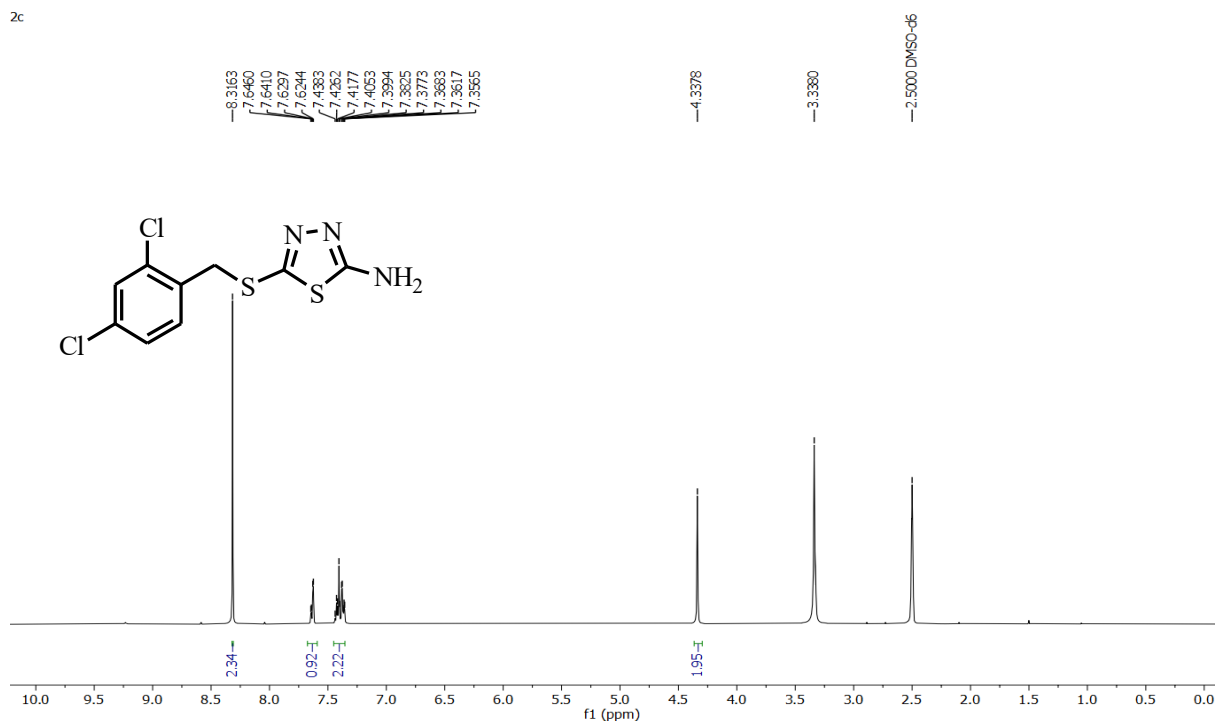S.F4': <sup>1</sup>H NMR of compound 2c

2c

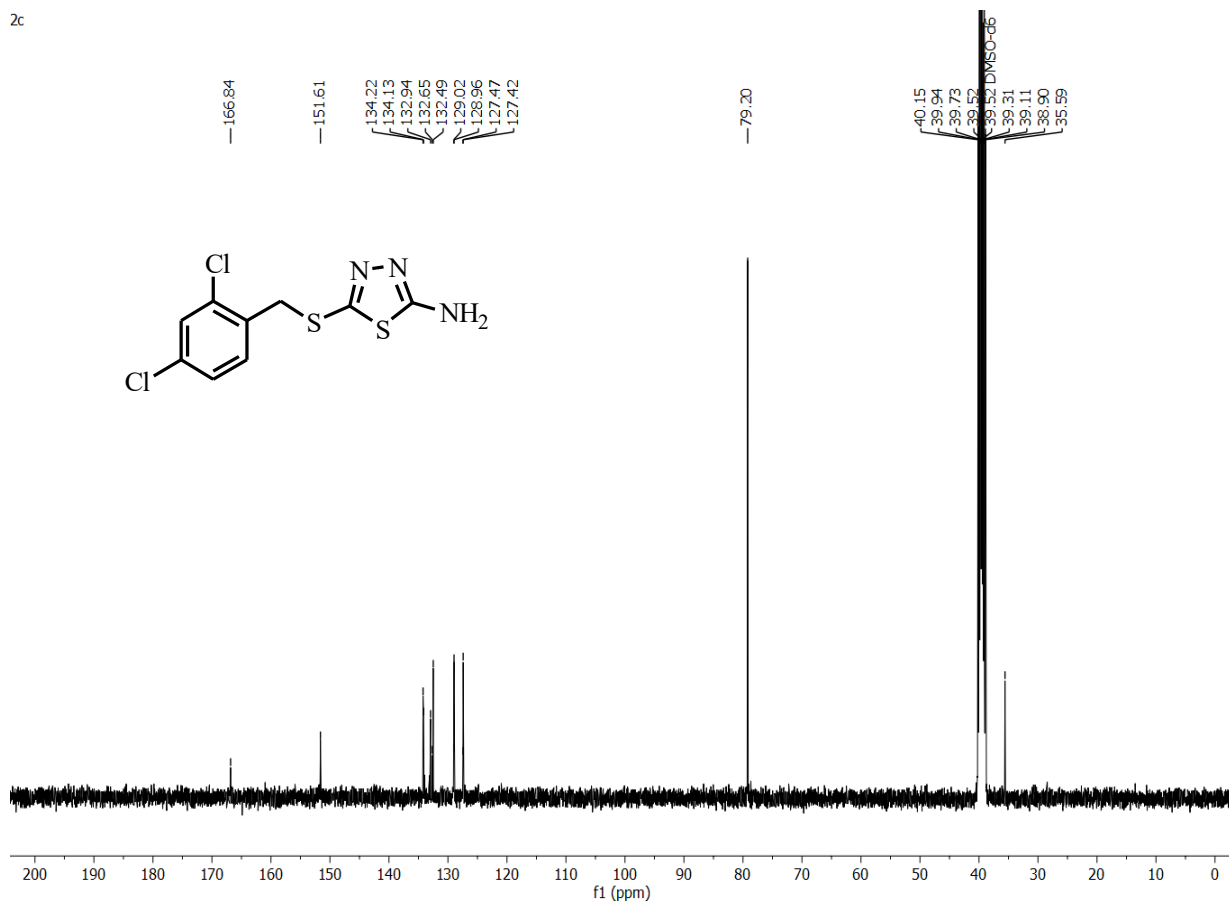S.F4'': <sup>13</sup>C NMR of compound 2c

3a

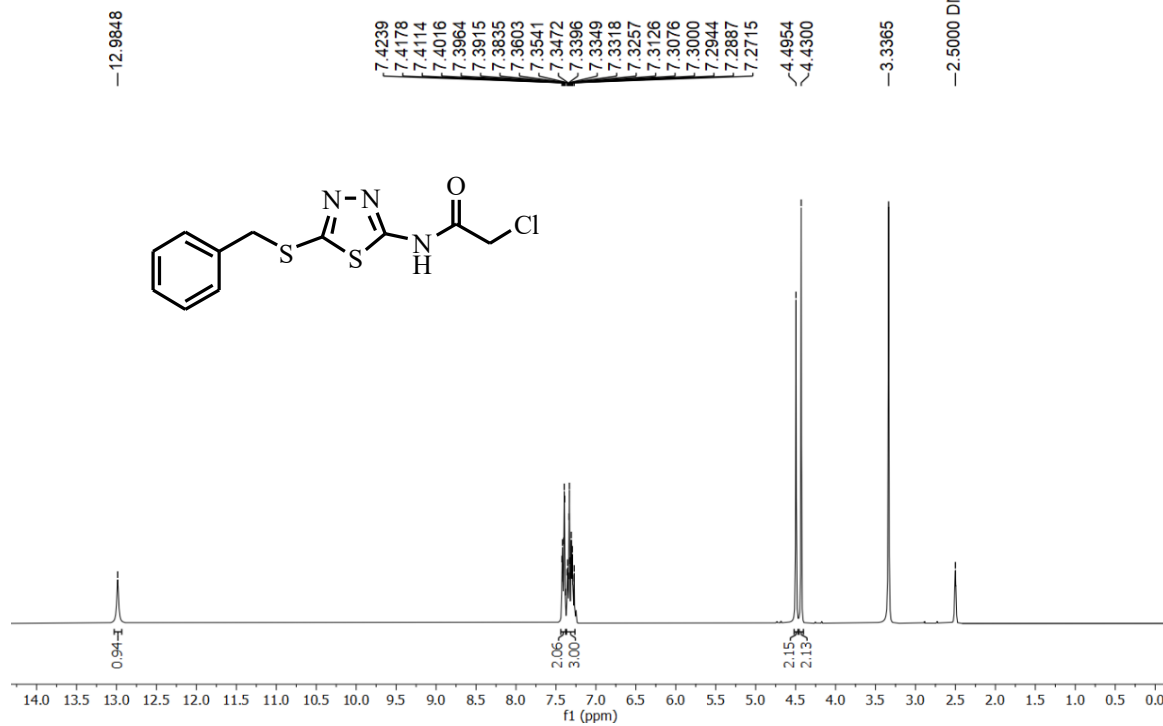S.F5':  $^1\text{H NMR}$  of compound 3a

3a

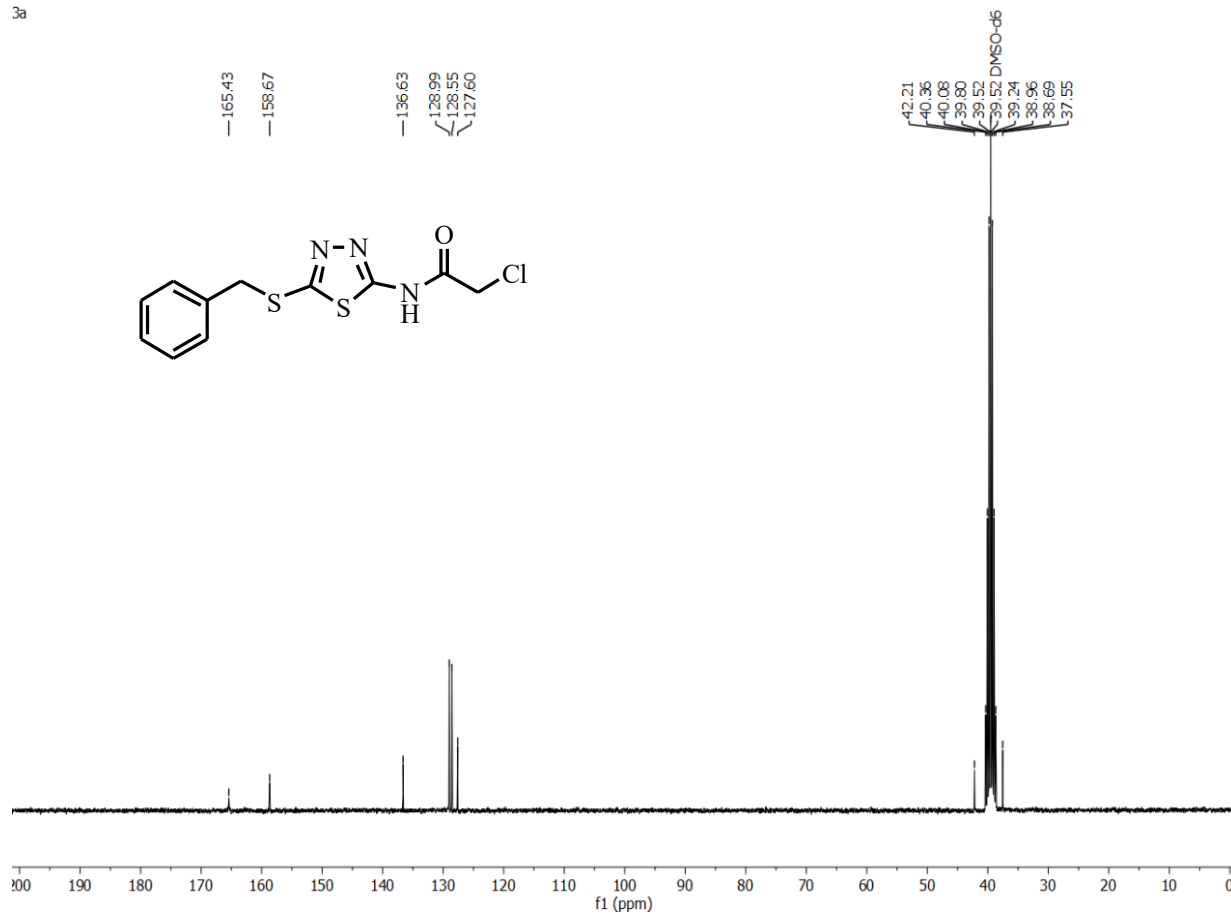S.F5'':  $^{13}\text{C NMR}$  of compound 3a

3b

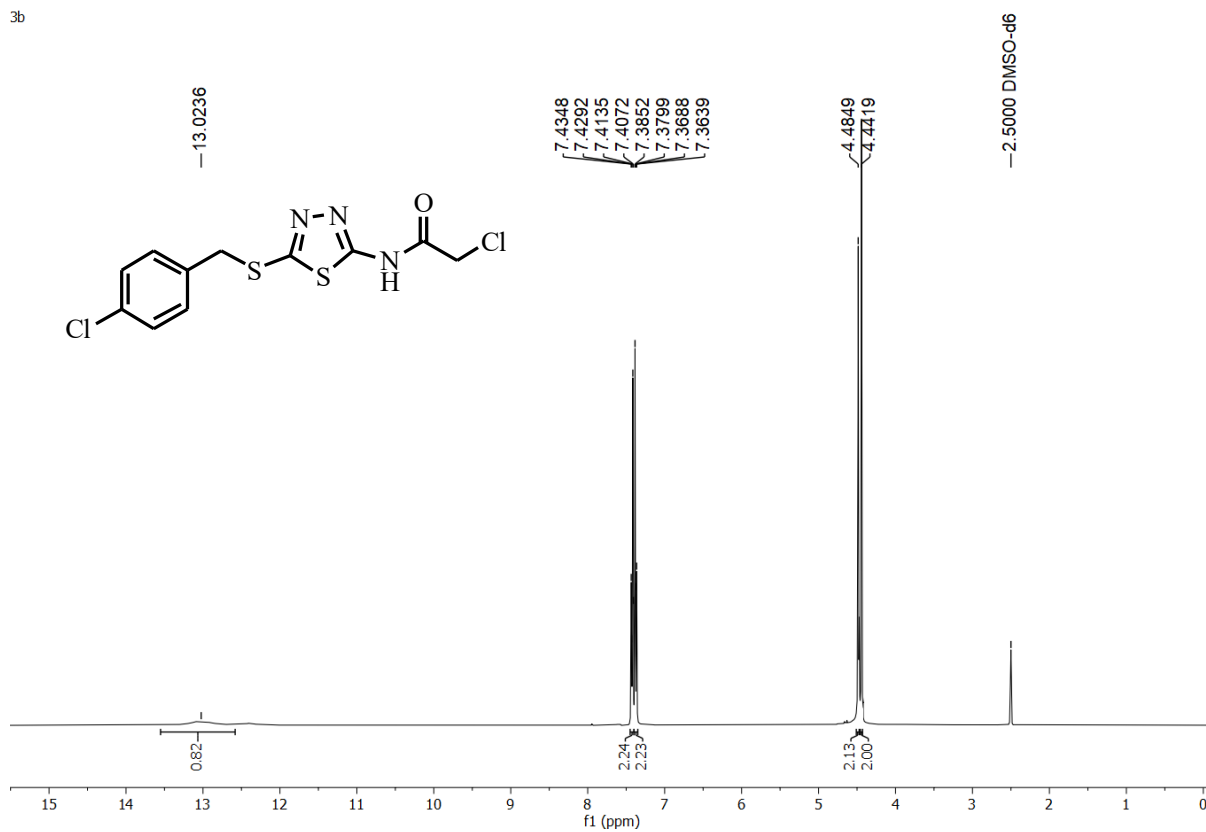S.F6':  $^1\text{H NMR}$  of compound 3b

3b

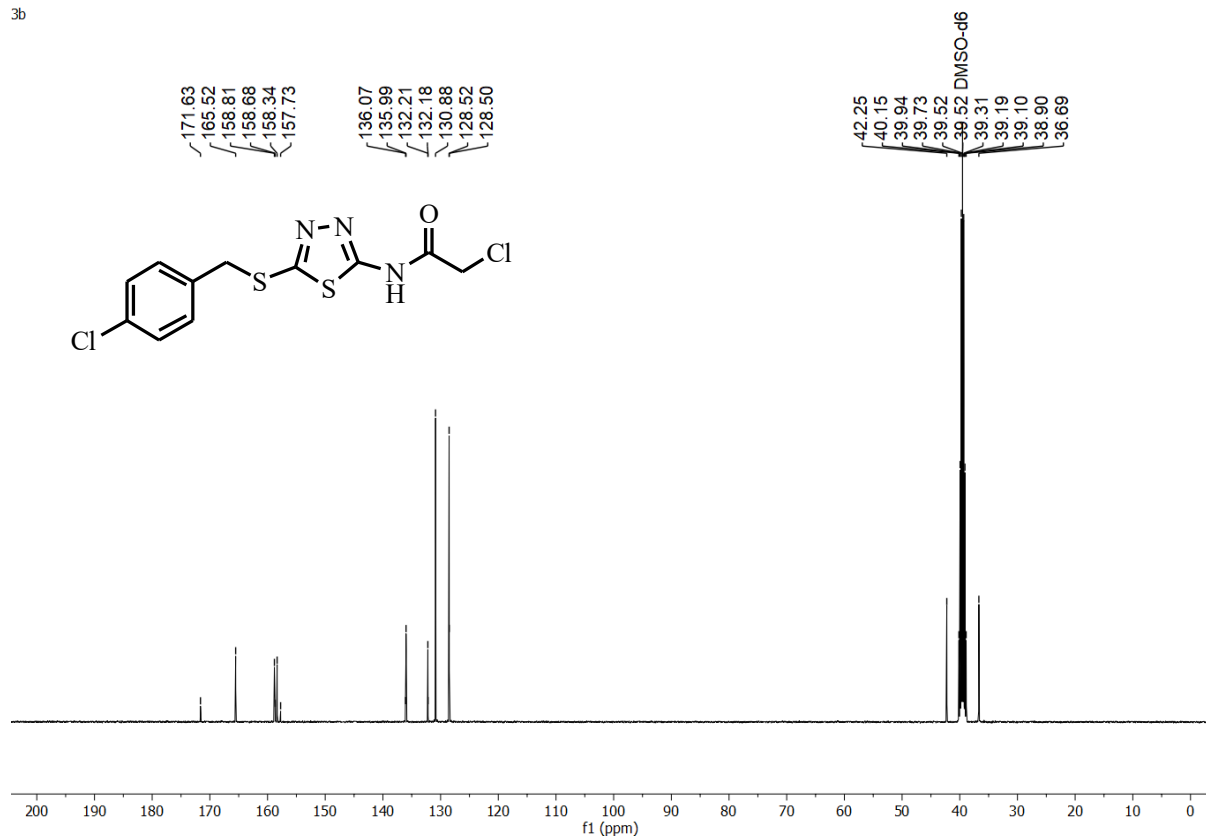S.F6'':  $^{13}\text{C NMR}$  of compound 3b



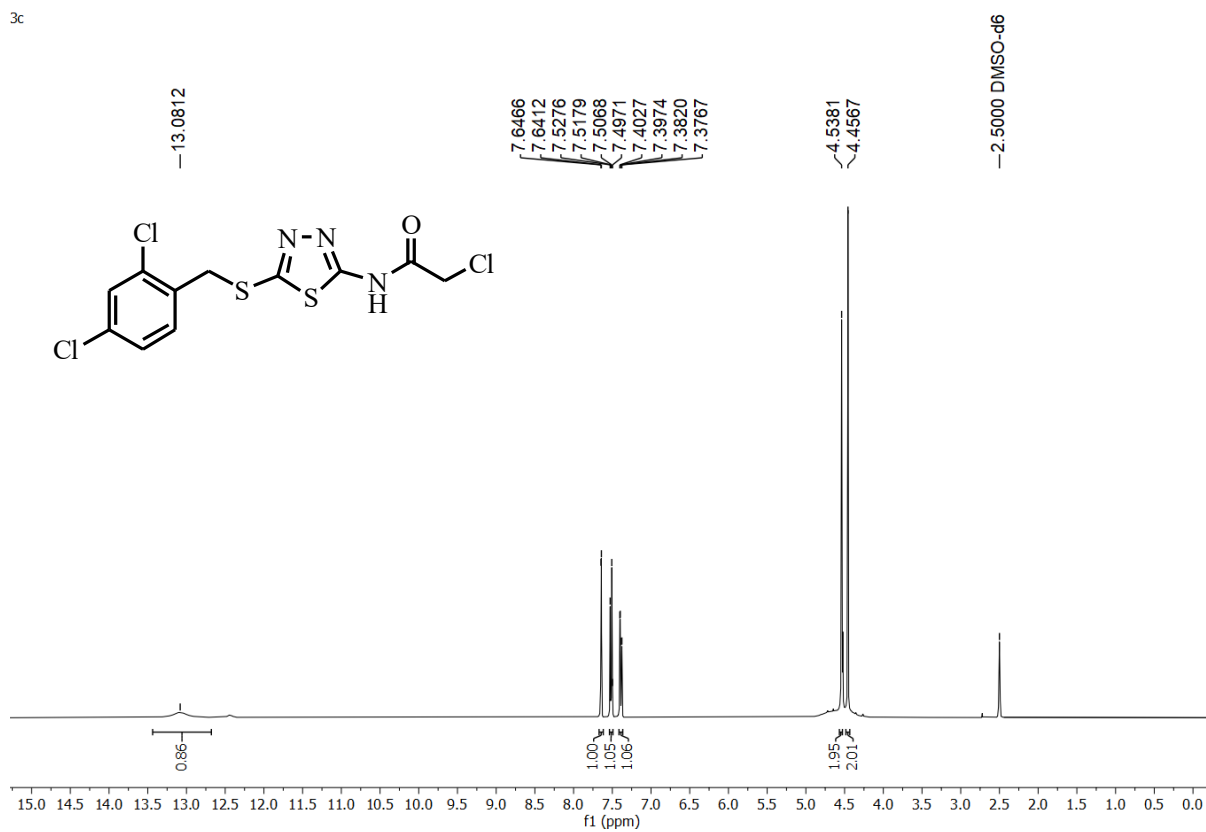S.F7':  $^1\text{H NMR}$  of compound 3c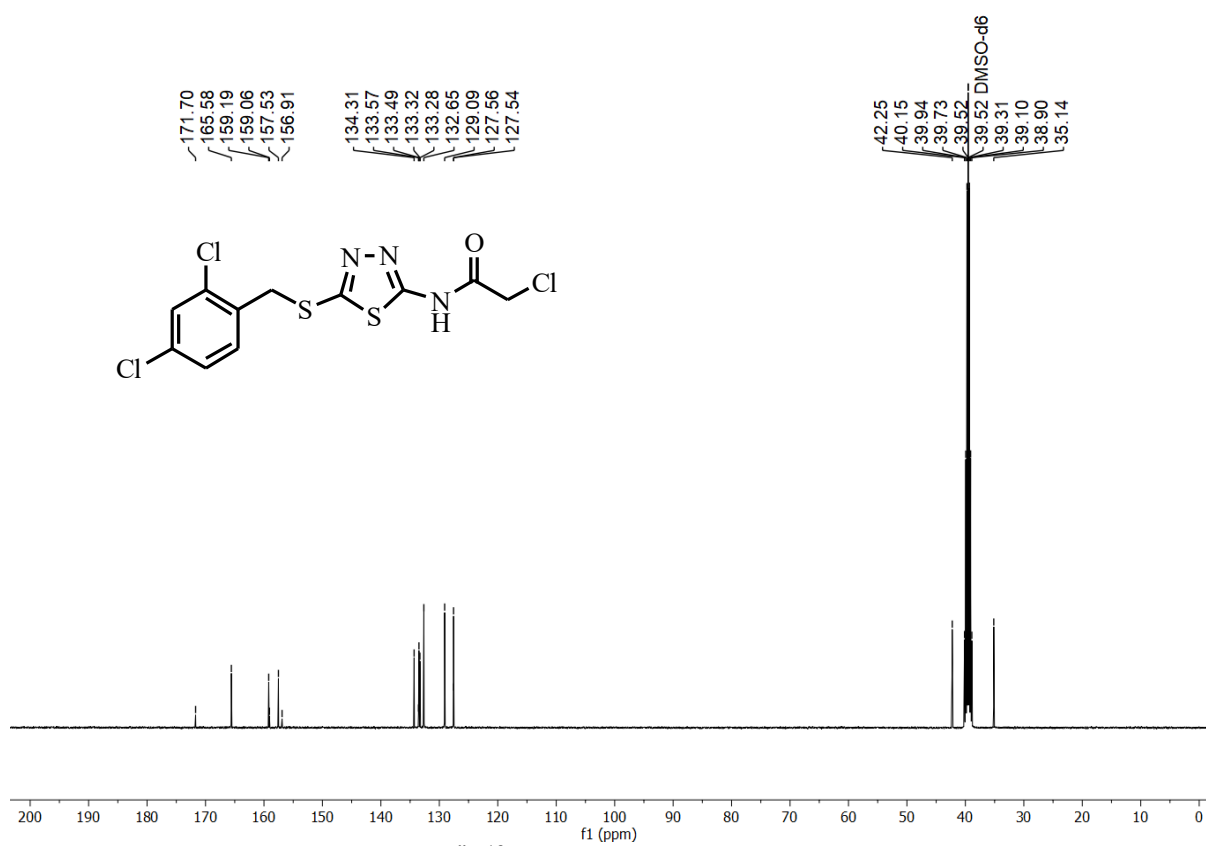S.F7'':  $^{13}\text{C NMR}$  of compound 3c

4a

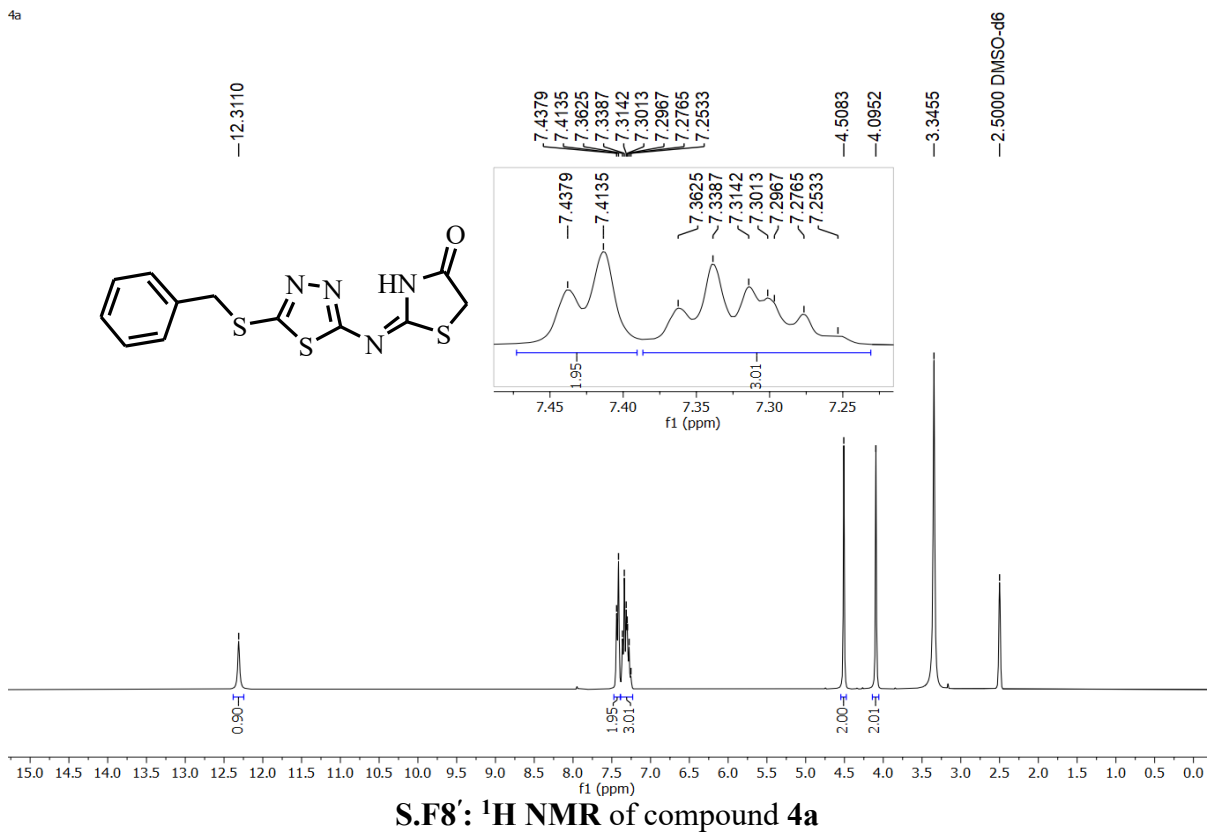

4A

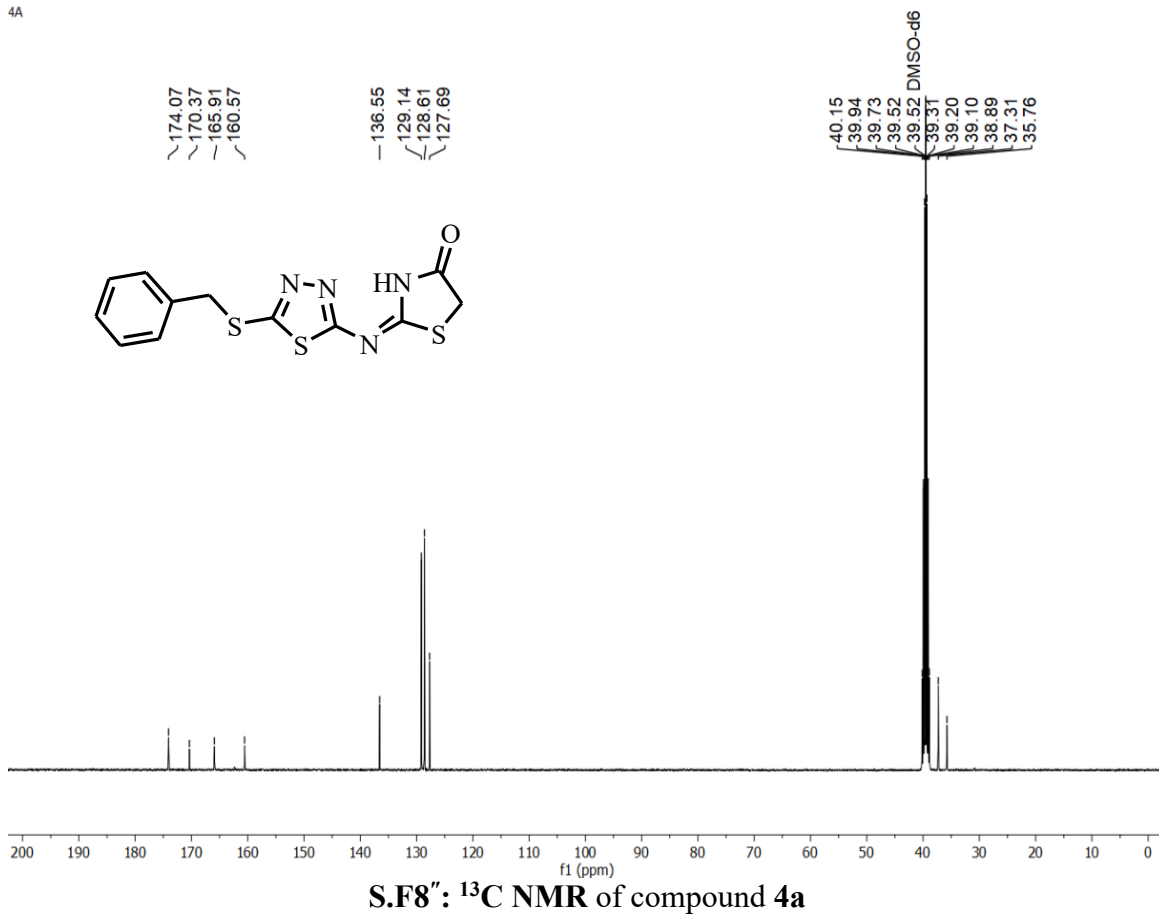

4b

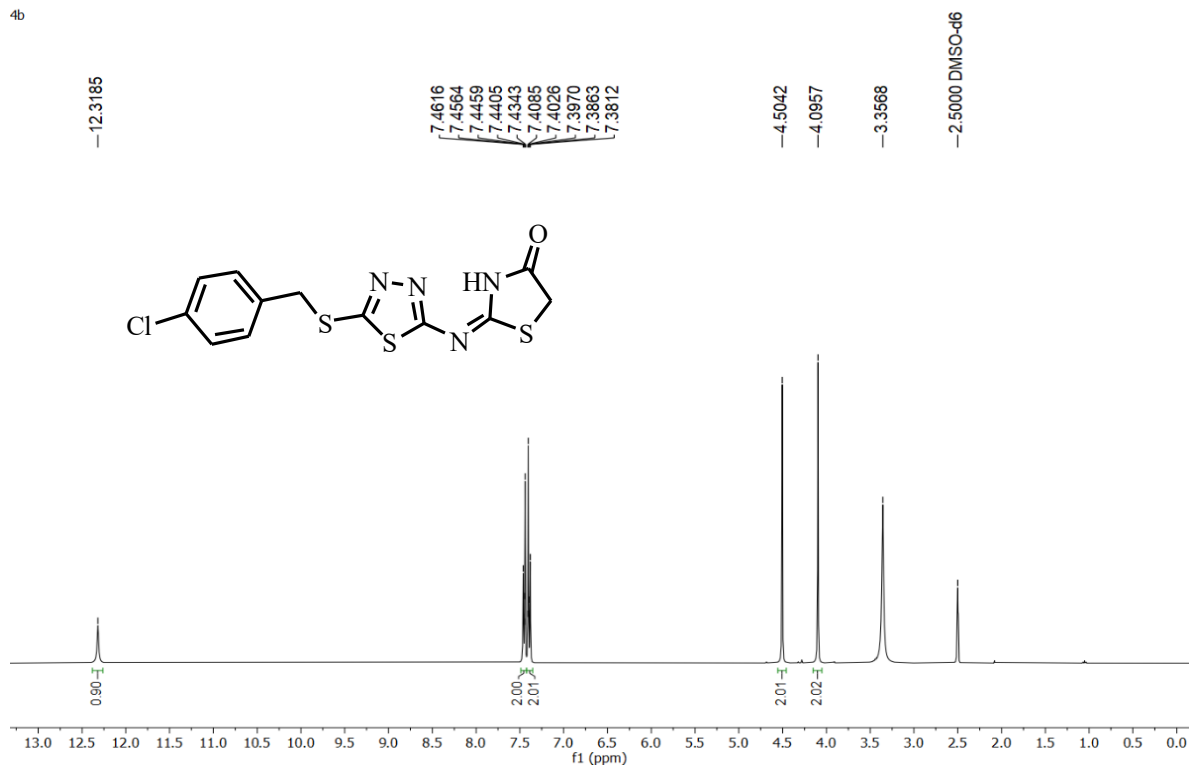S.F9':  $^1\text{H NMR}$  of compound 4b

4b

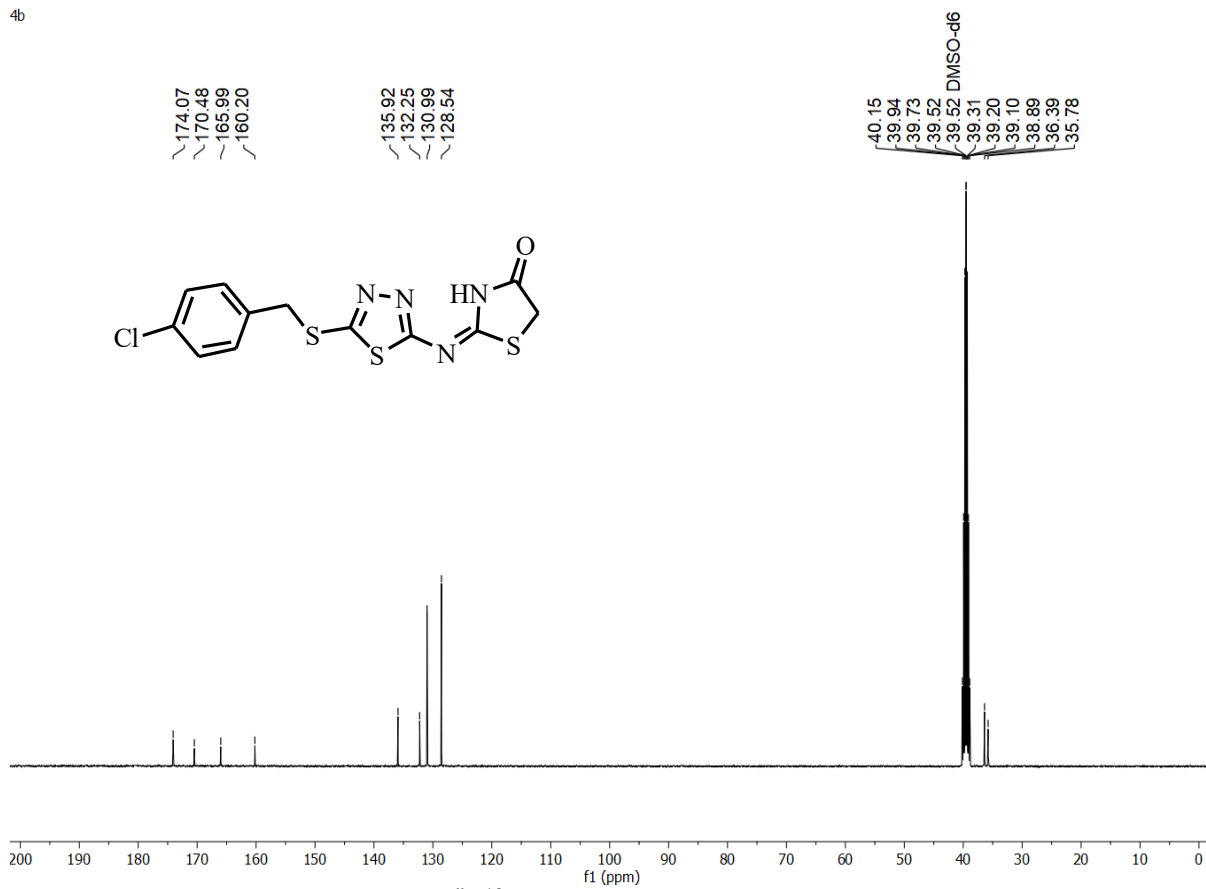S.F9'':  $^{13}\text{C NMR}$  of compound 4b

4c

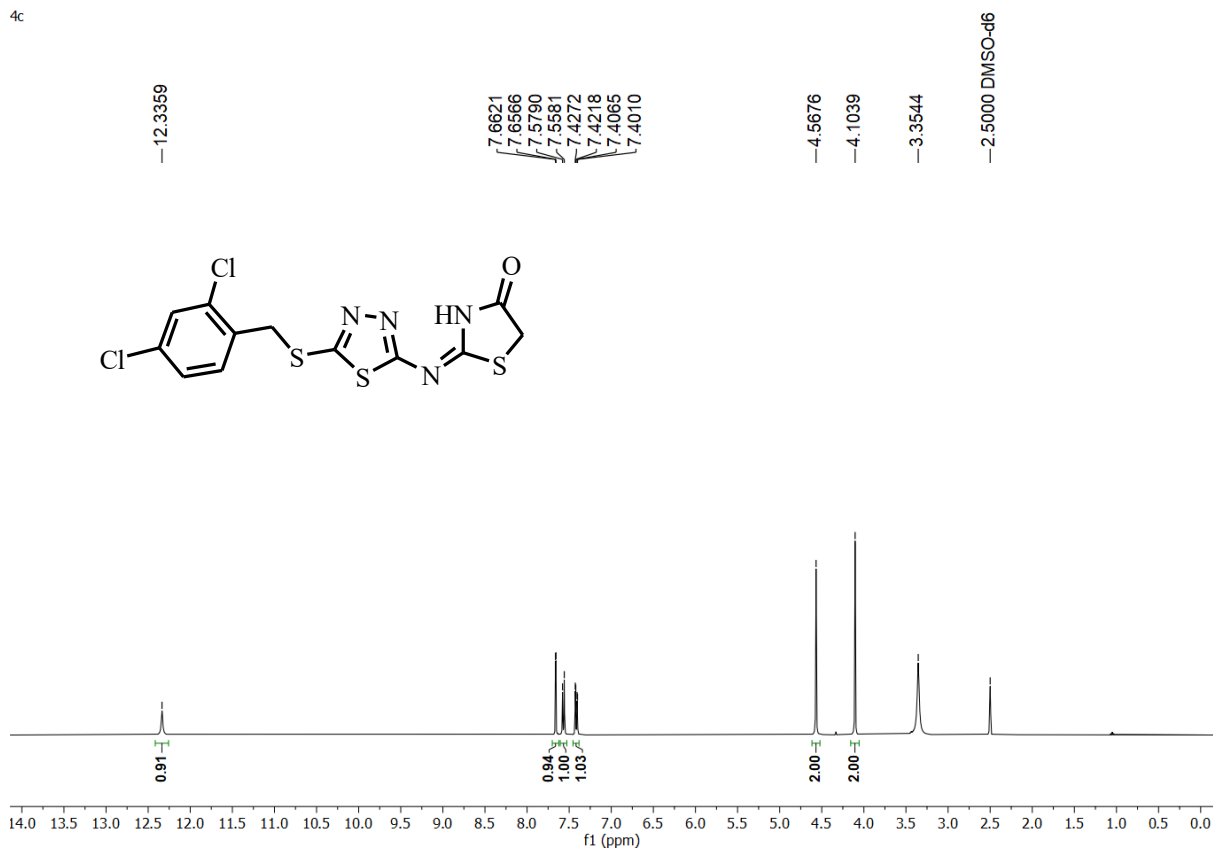S.F10': <sup>1</sup>H NMR of compound 4c

4c

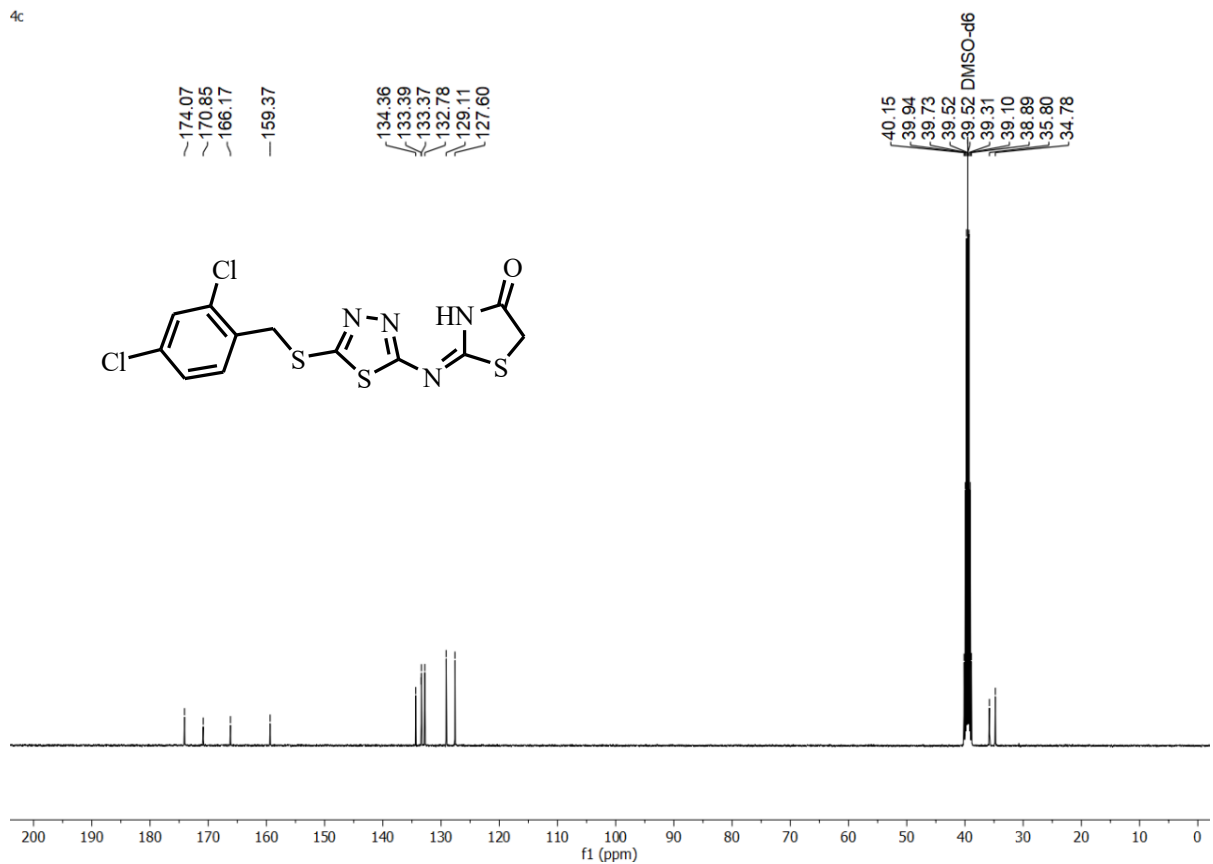S.F10'': <sup>13</sup>C NMR of compound 4c

5A

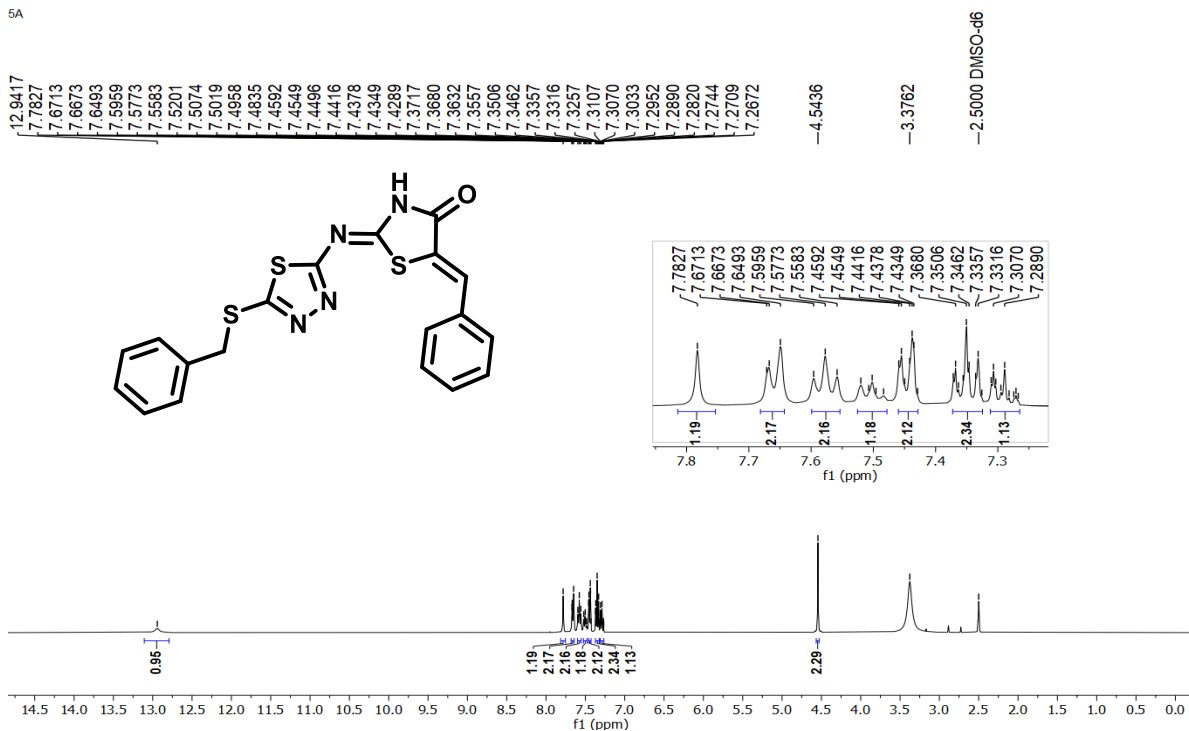S.F11':  $^1\text{H NMR}$  of compound 5a

5A

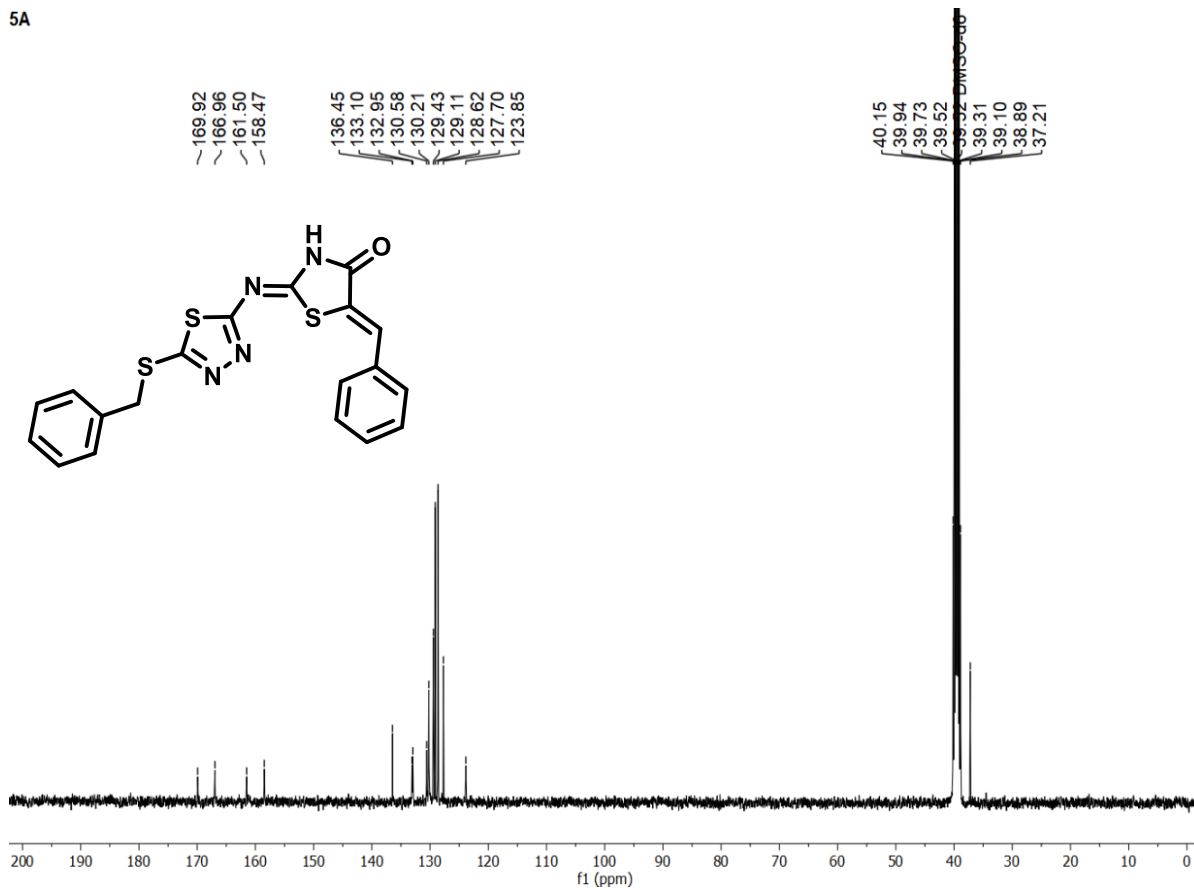S.F11'':  $^{13}\text{C NMR}$  of compound 5a

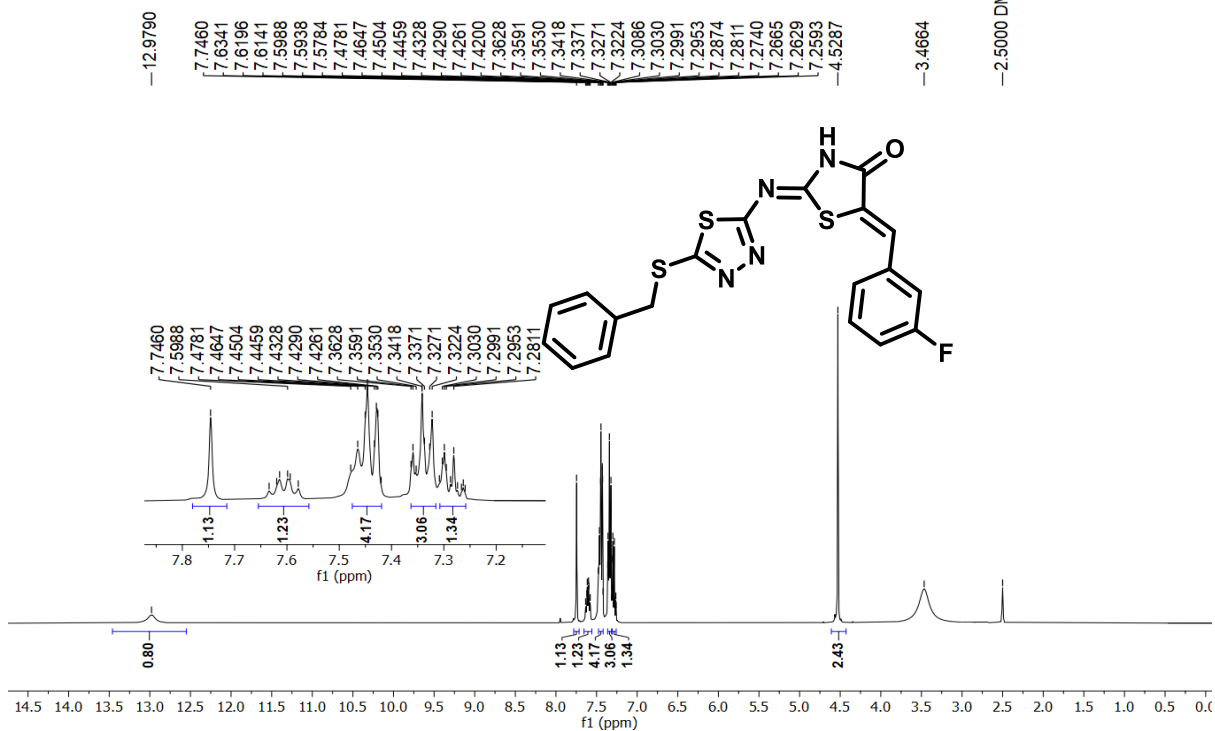S.F12': <sup>1</sup>H NMR of compound 5b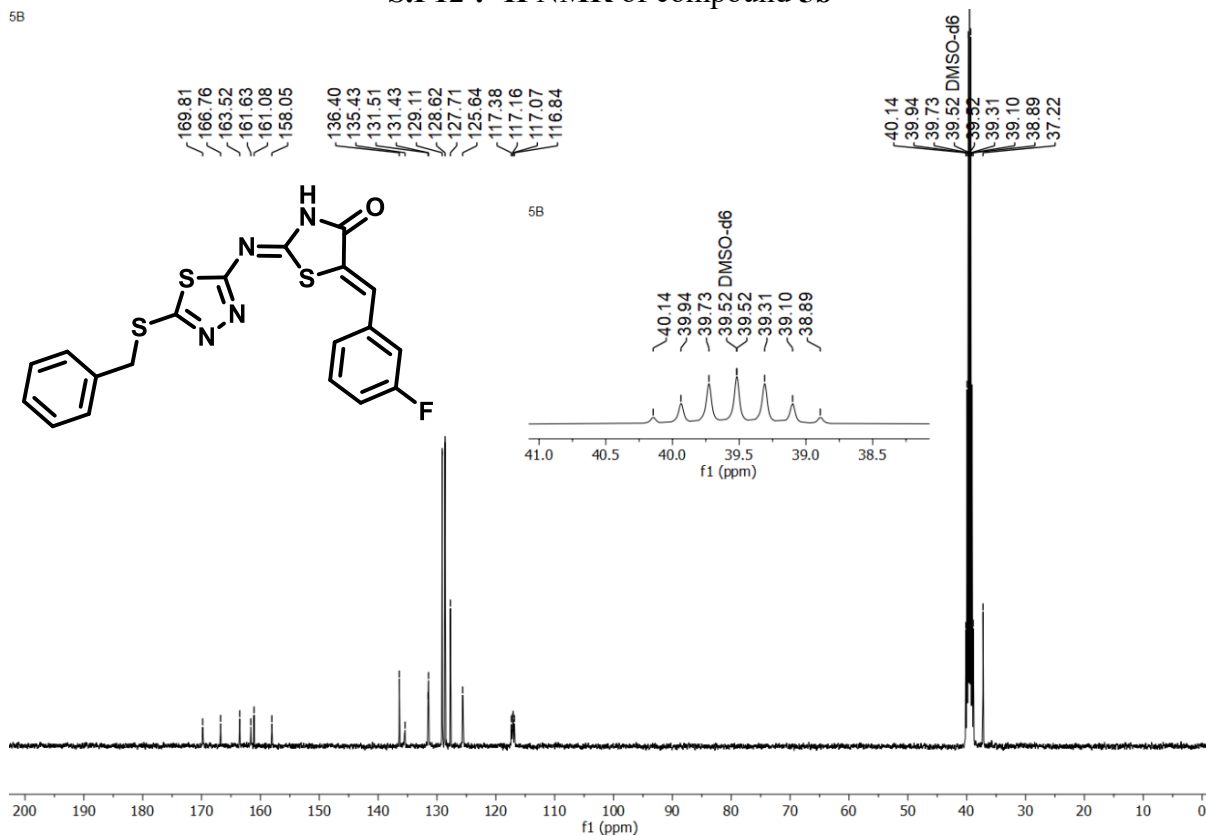S.F12'': <sup>13</sup>C NMR of compound 5b

5B

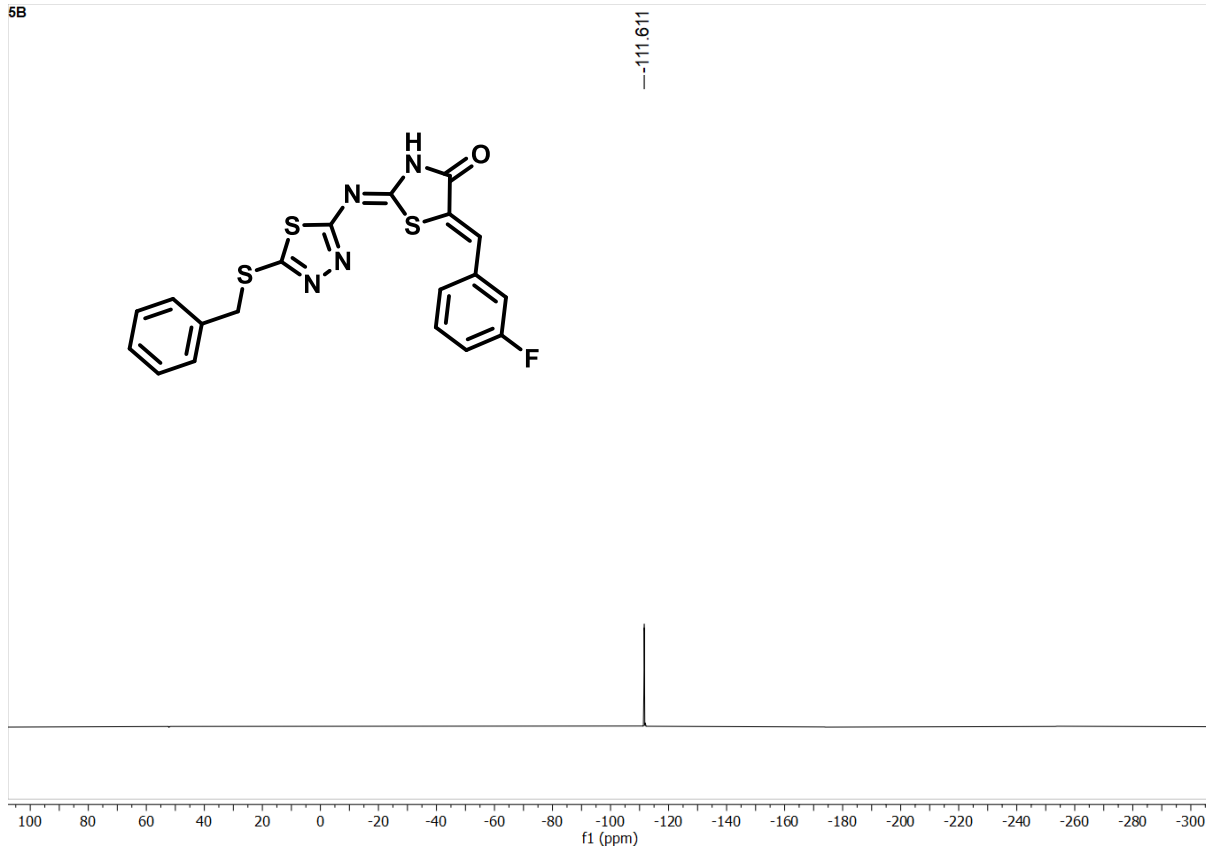

S.F12''':  $^{19}\text{F}$  NMR of compound 5b

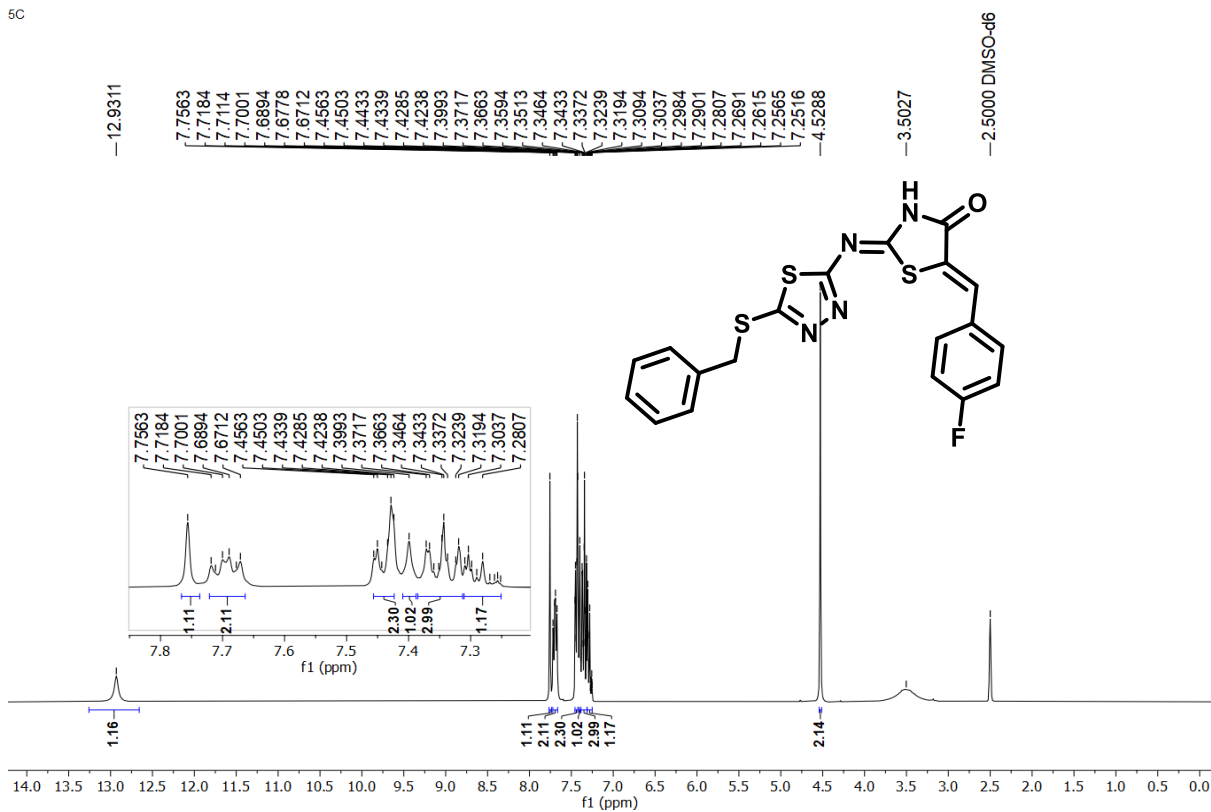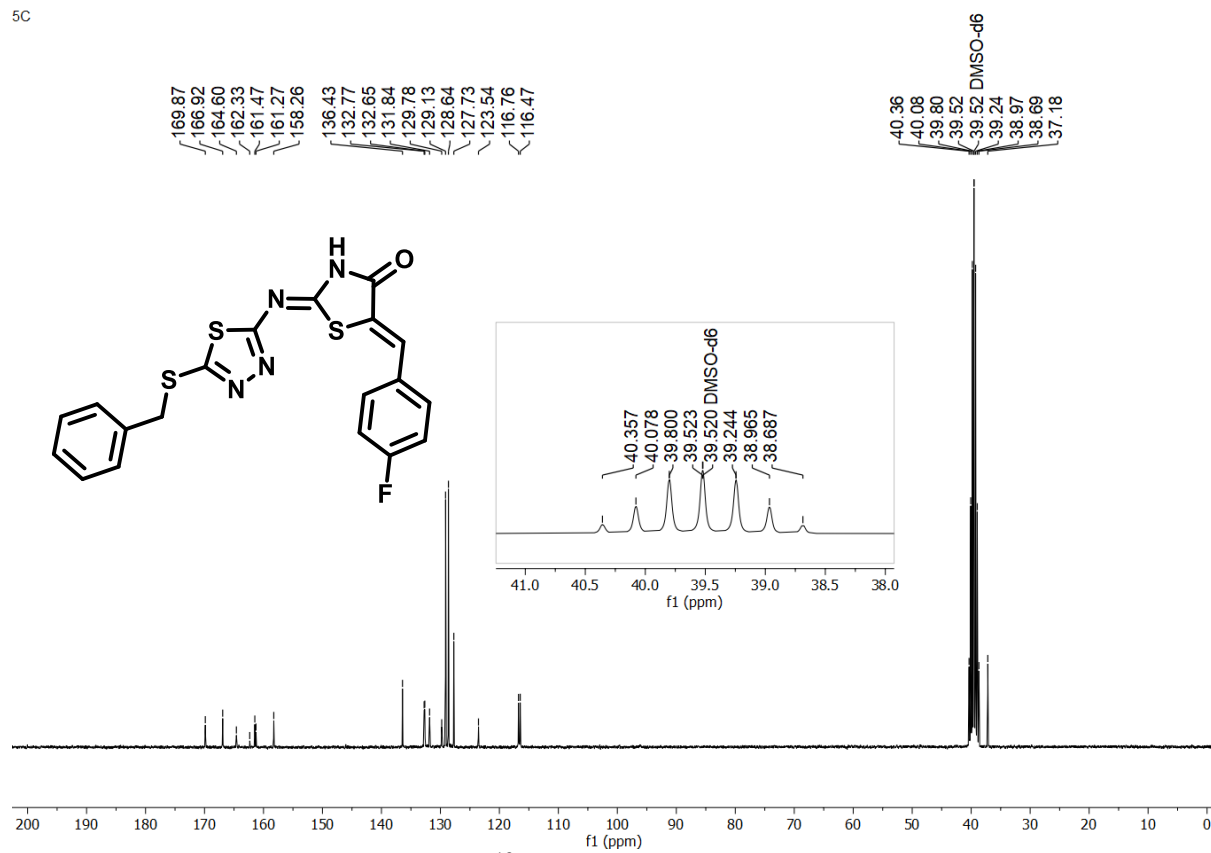



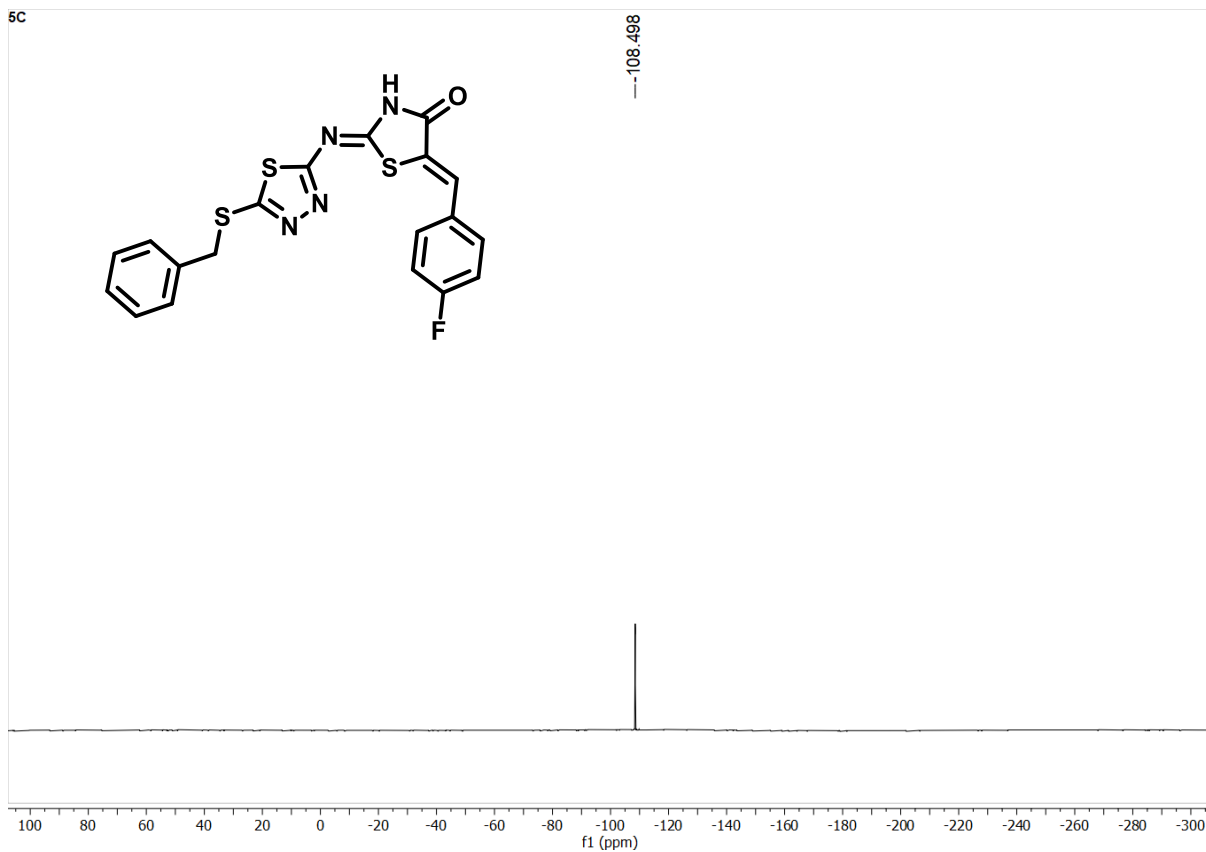

S.F13''':  $^{19}\text{F}$  NMR of compound 5c

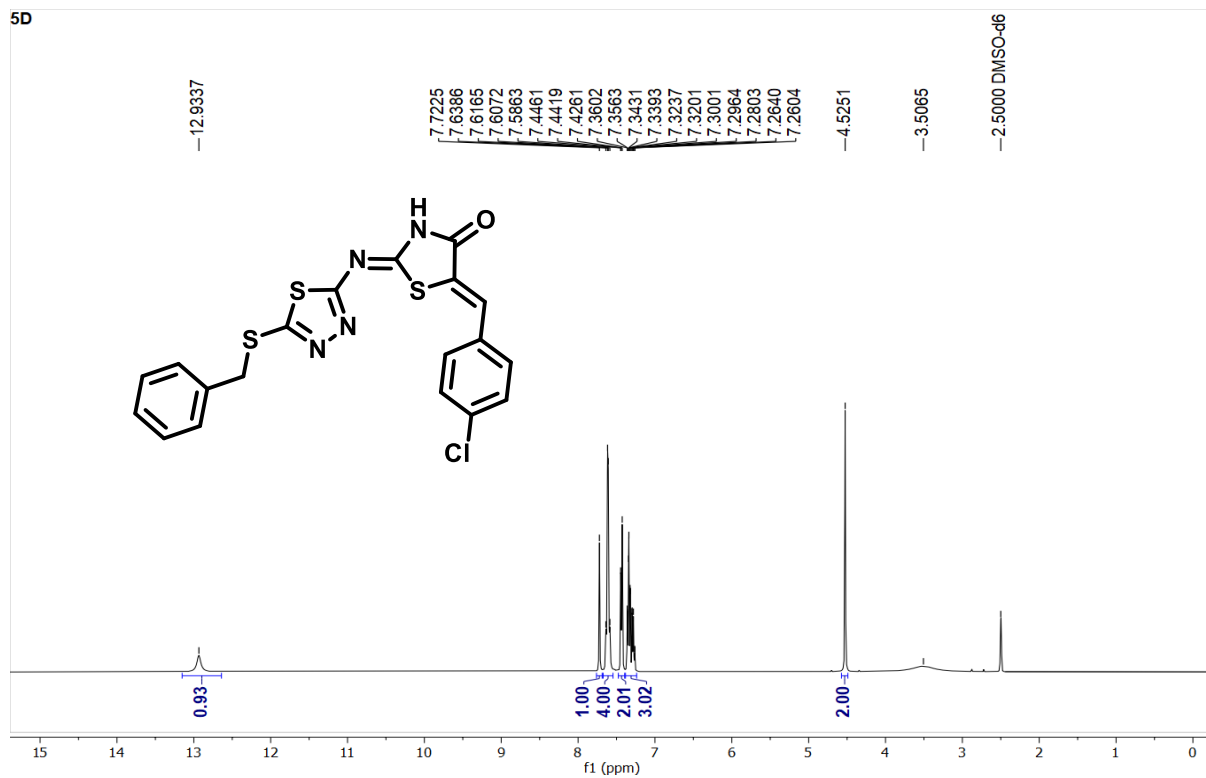

S.F14':  $^1\text{H}$  NMR of compound 5d

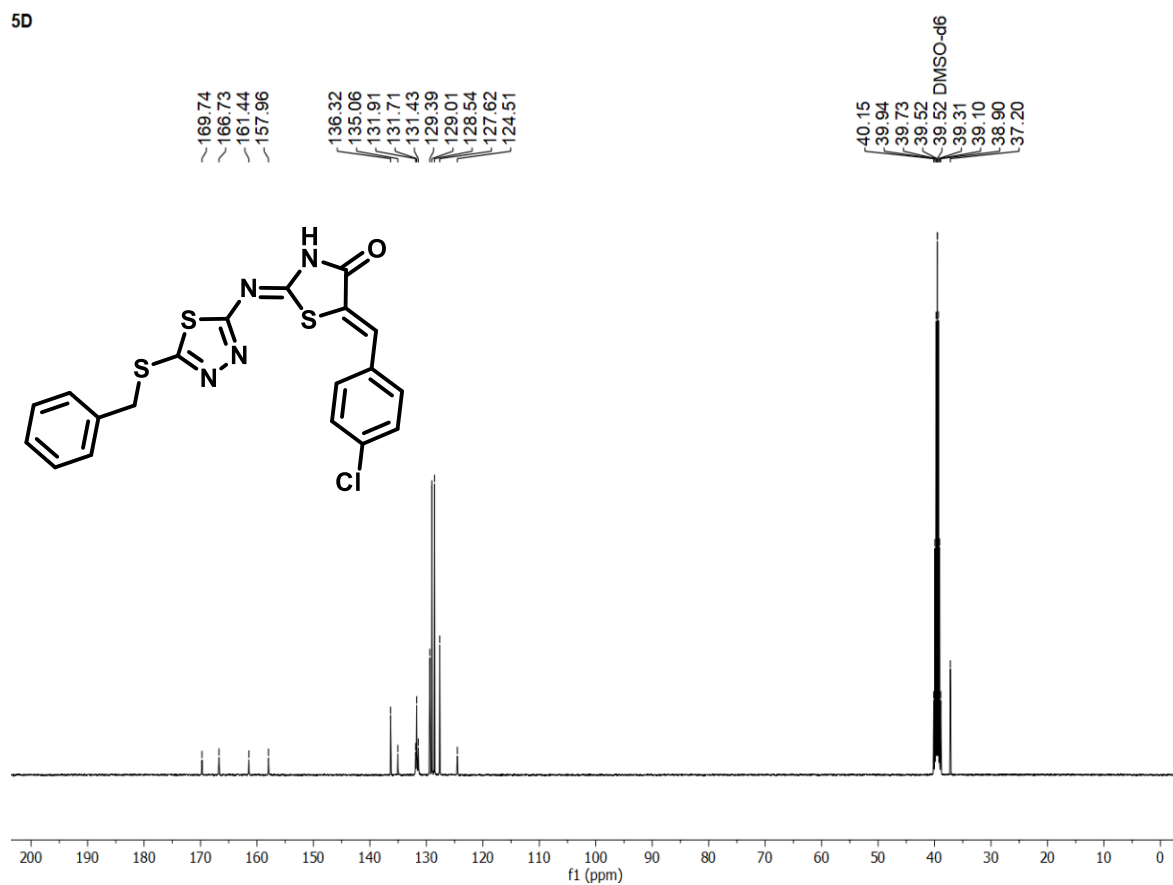

S.F14'':  $^{13}\text{C}$  NMR of compound 5d

5E

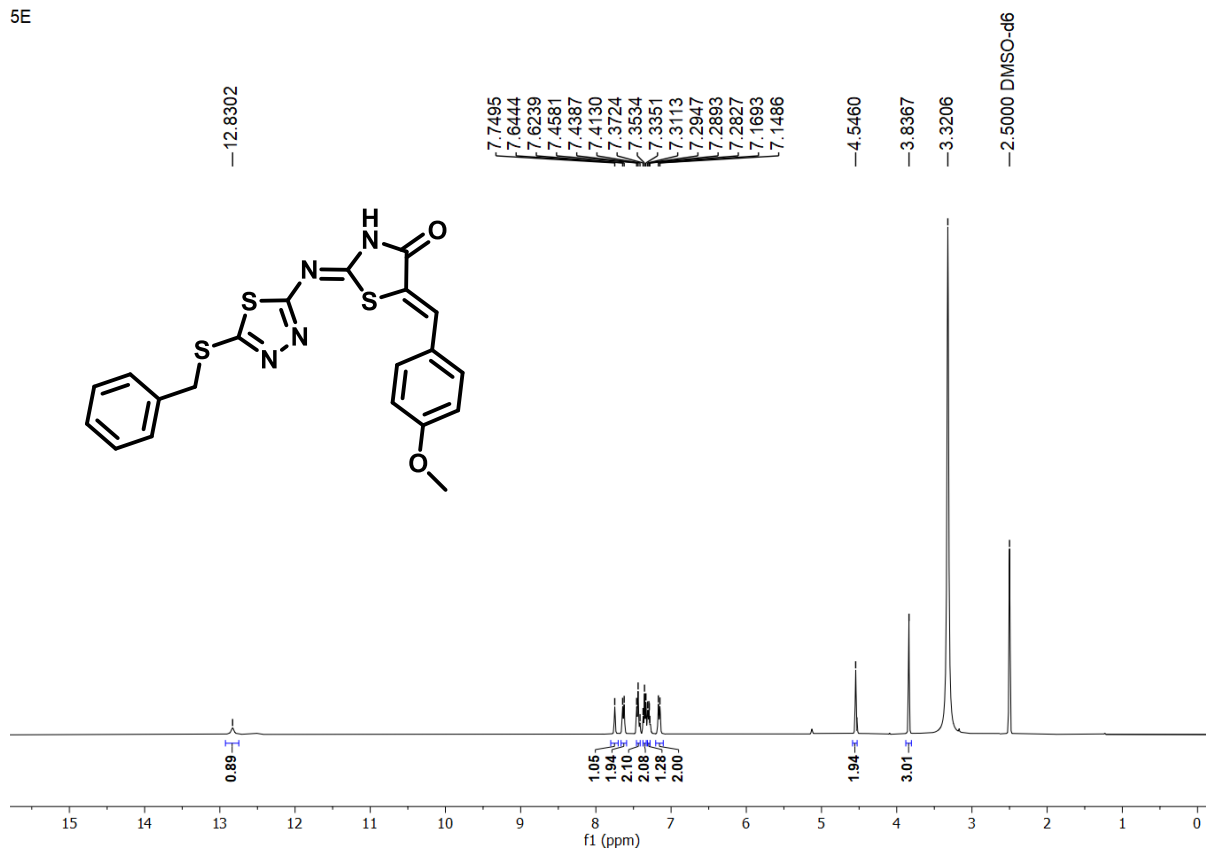S.F15':  $^1\text{H}$  NMR of compound 5e

5E

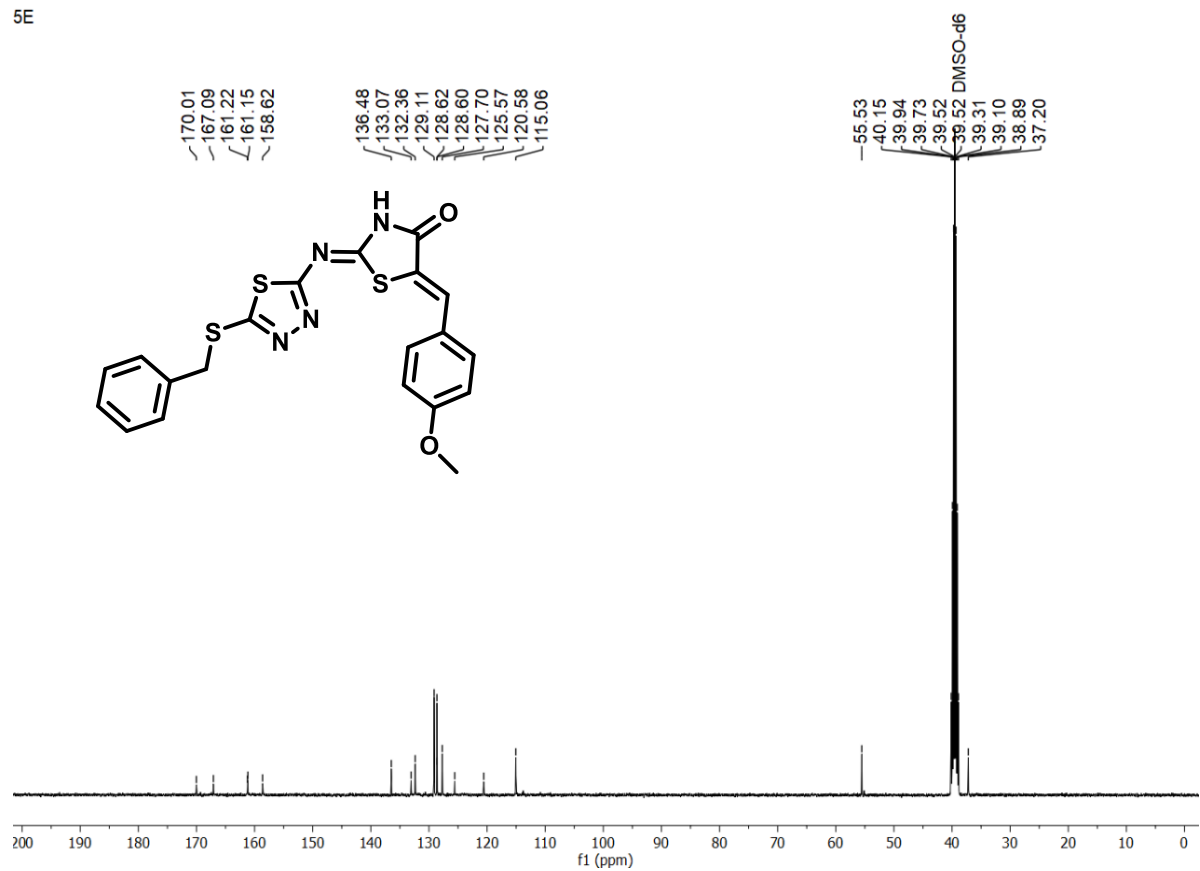S.F15'':  $^{13}\text{C}$  NMR of compound 5e

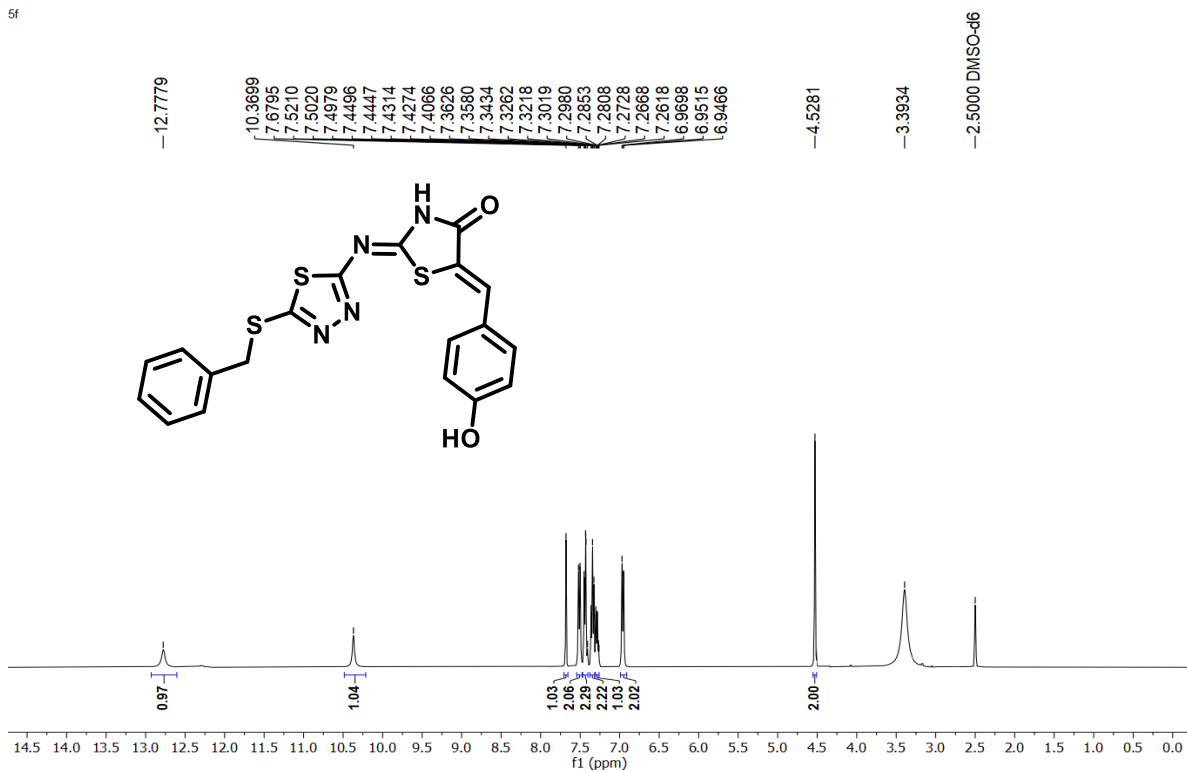S.F16':  $^1\text{H NMR}$  of compound 5f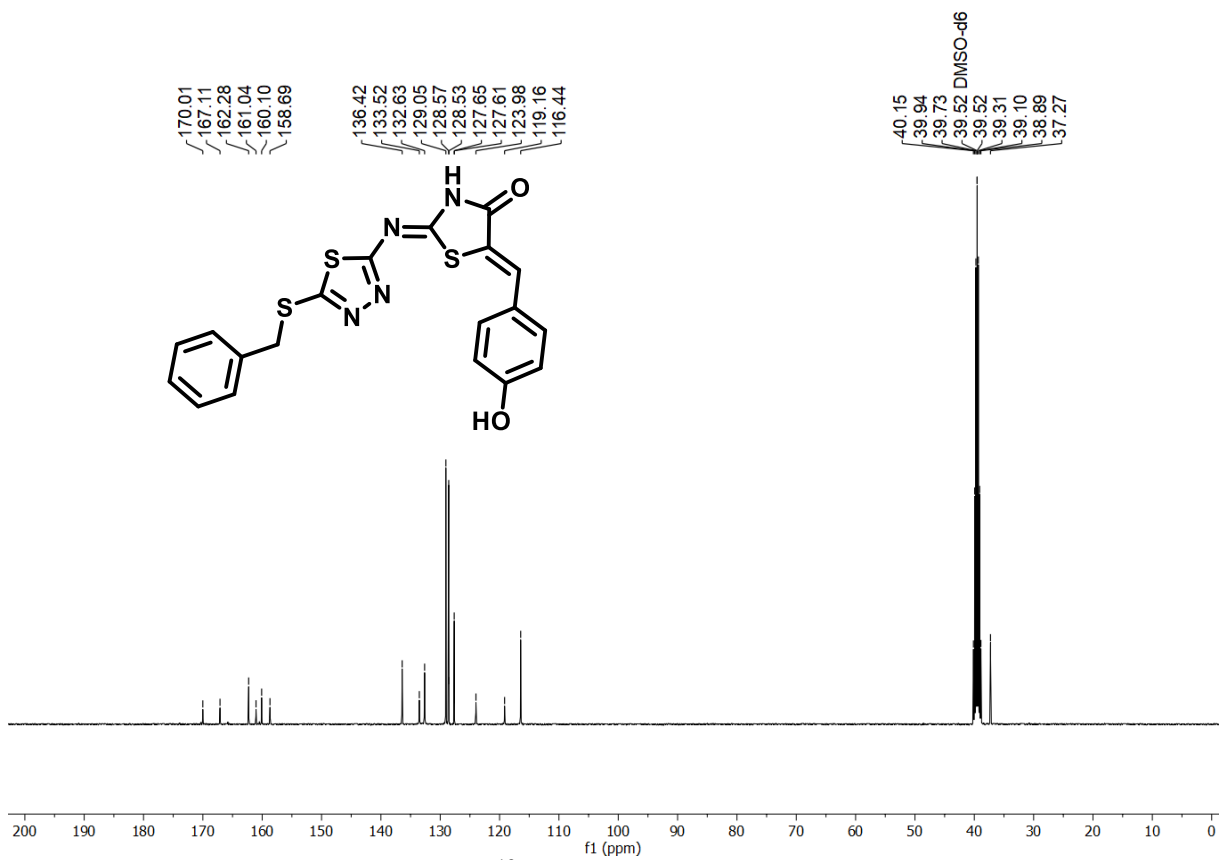S.F16'':  $^{13}\text{C NMR}$  of compound 5f

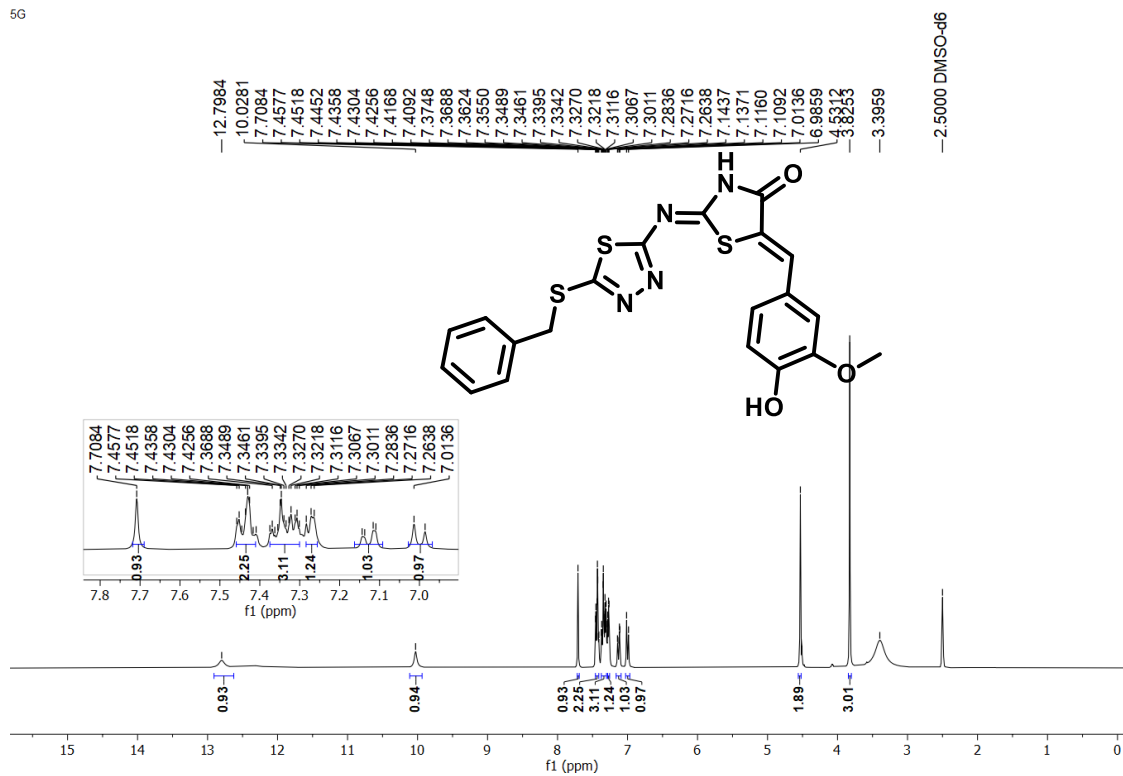S.F17':  $^1\text{H NMR}$  of compound 5g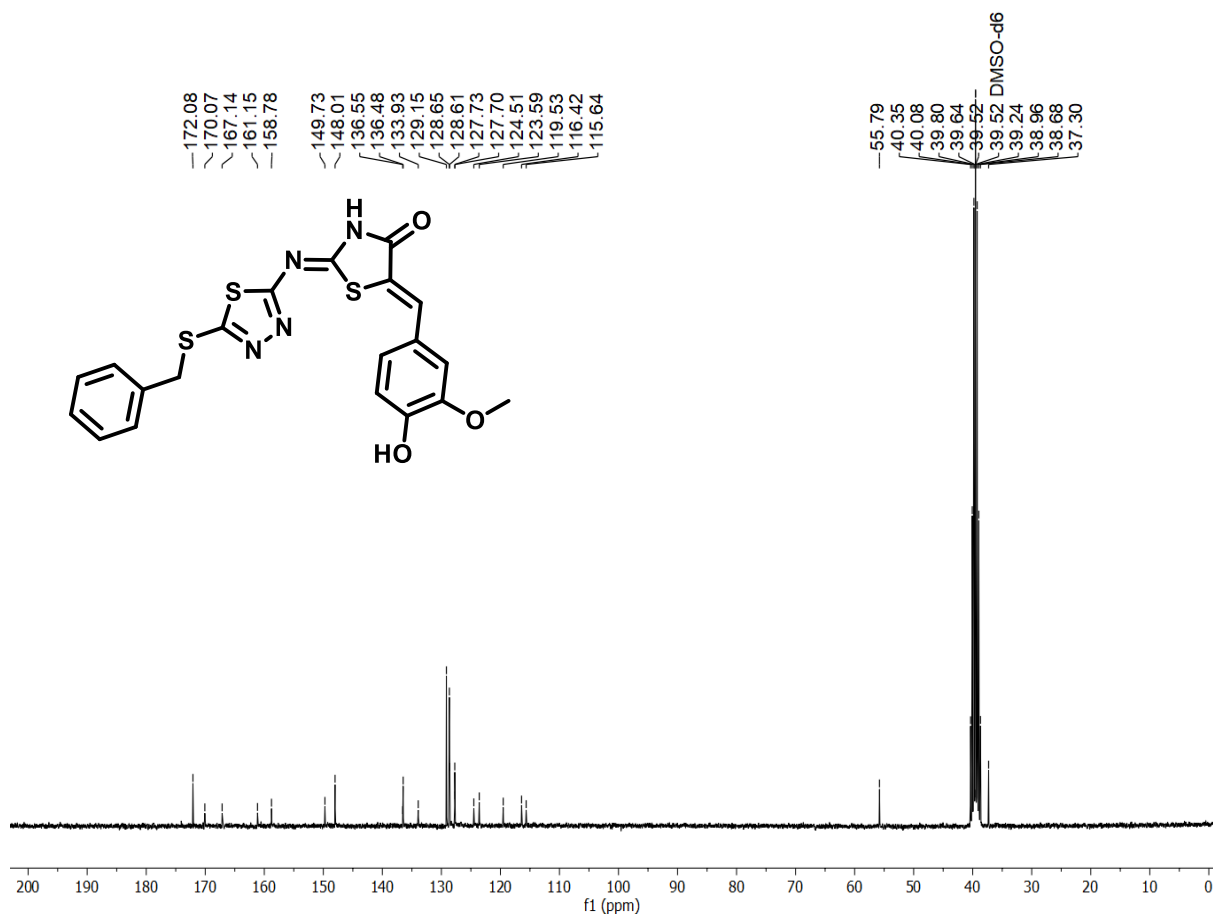S.F17'':  $^{13}\text{C NMR}$  of compound 5g

6A

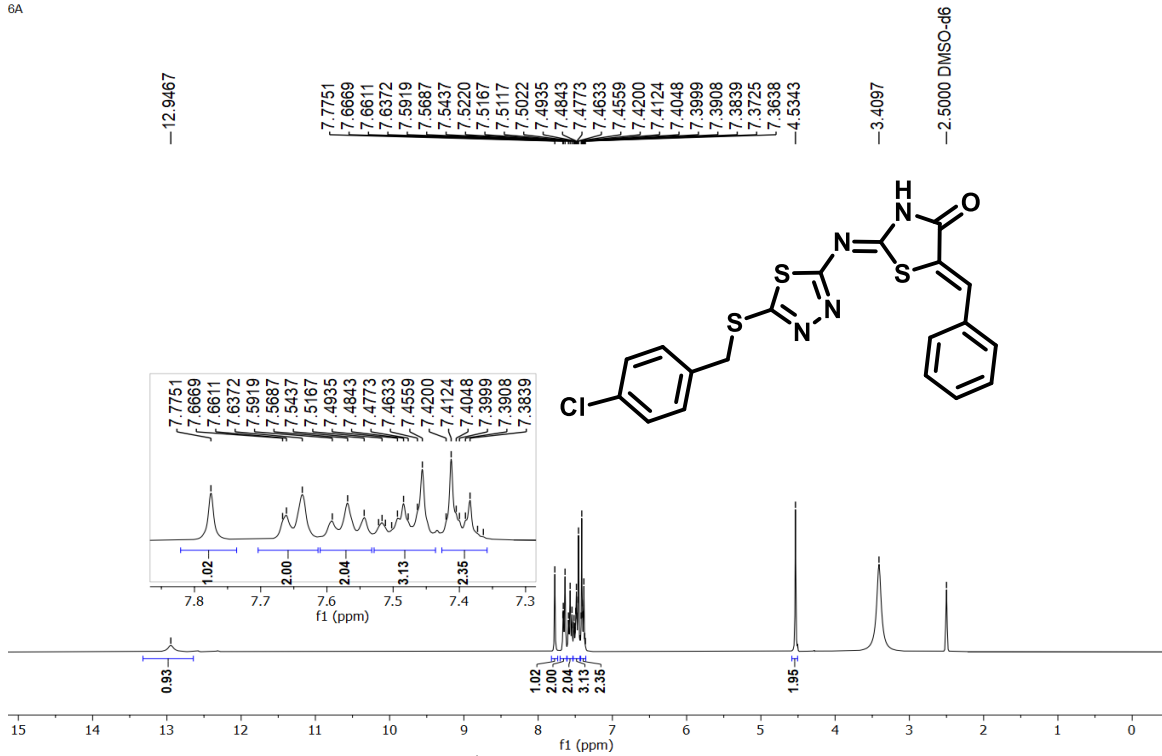S.F18': <sup>1</sup>H NMR of compound 6a

6A

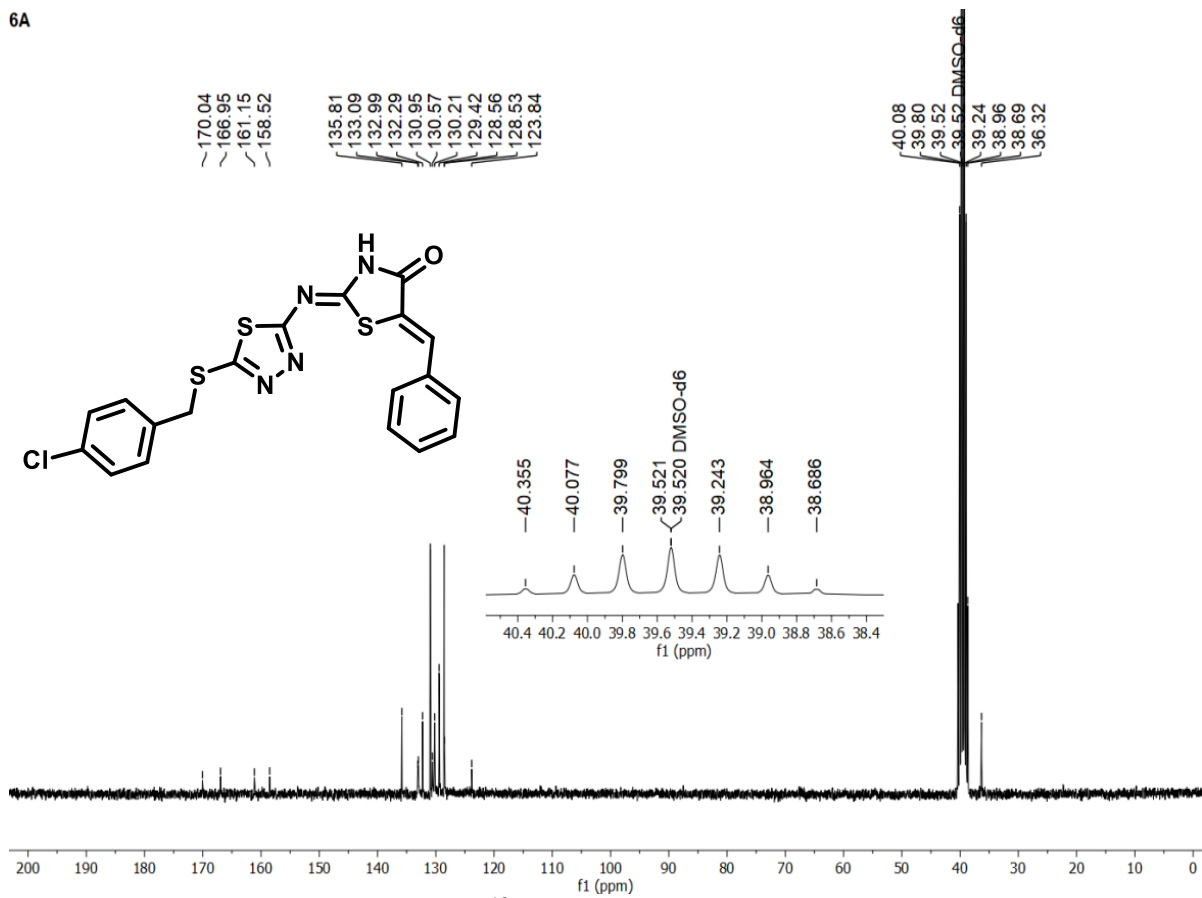S.F18'': <sup>13</sup>C NMR of compound 6a

6b

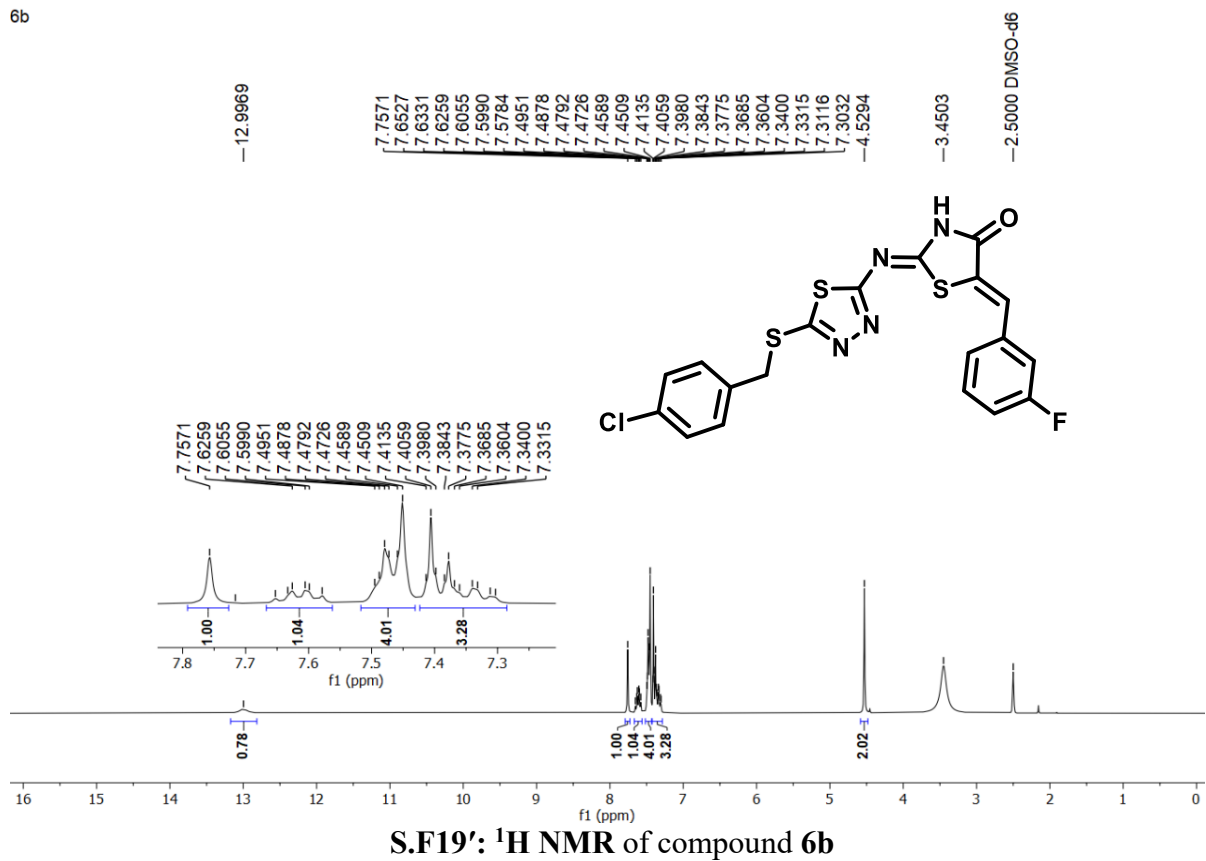

6b

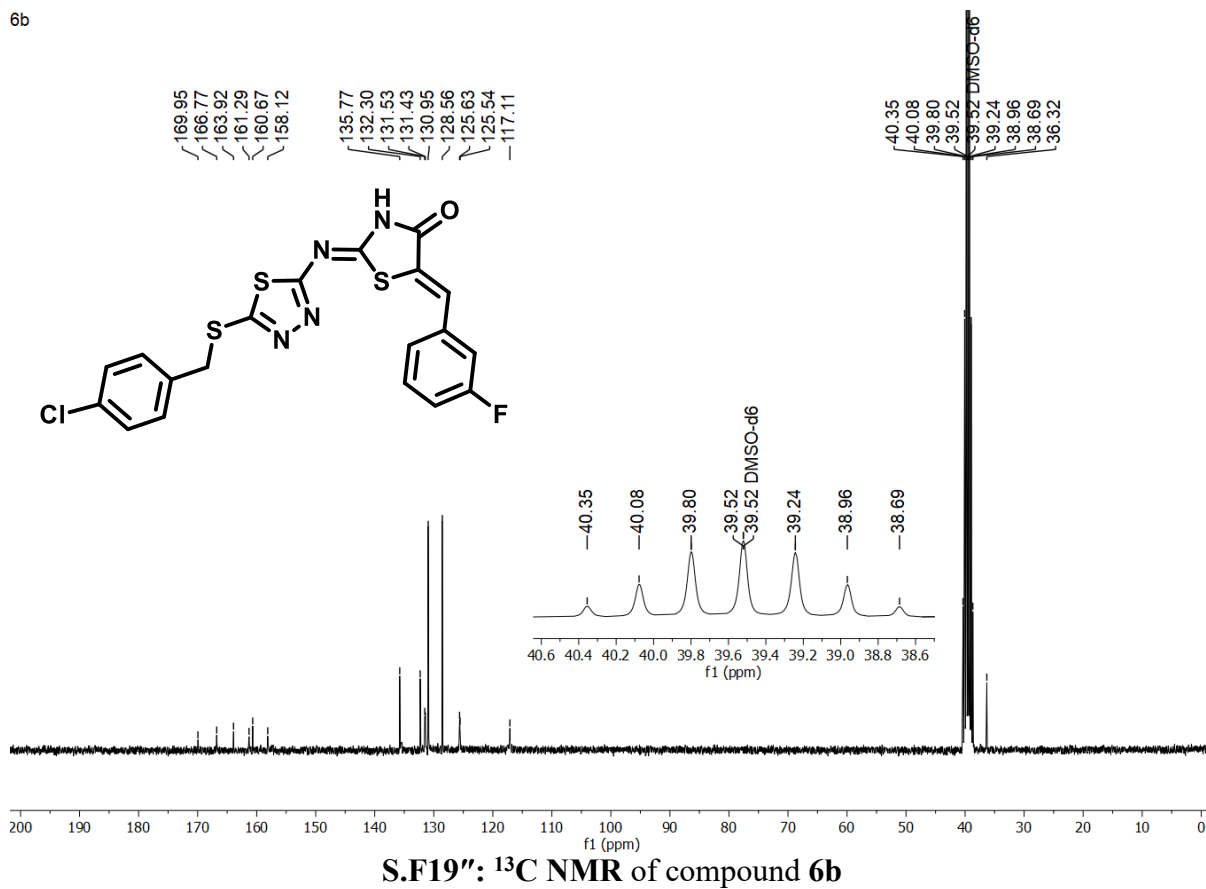

6B

--111.603

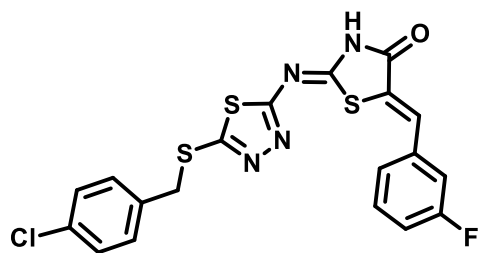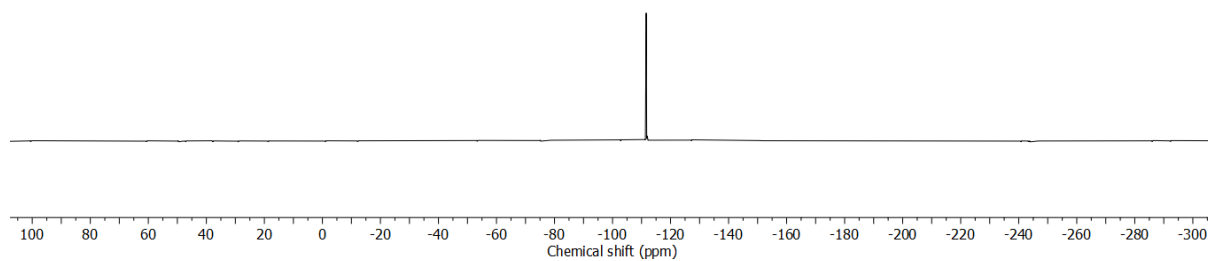

S.F19''': <sup>19</sup>F NMR of compound 6b



6c

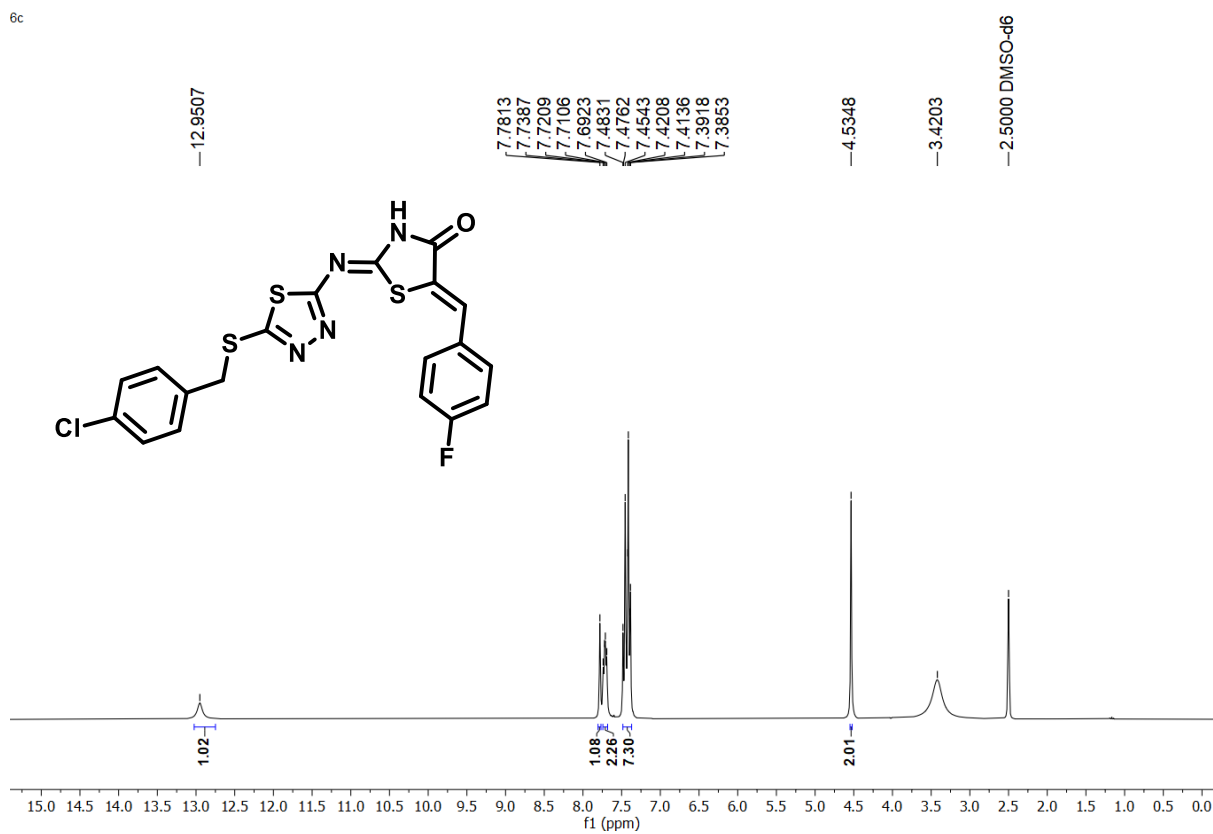S.F20':  $^1\text{H NMR}$  of compound 6c

6c

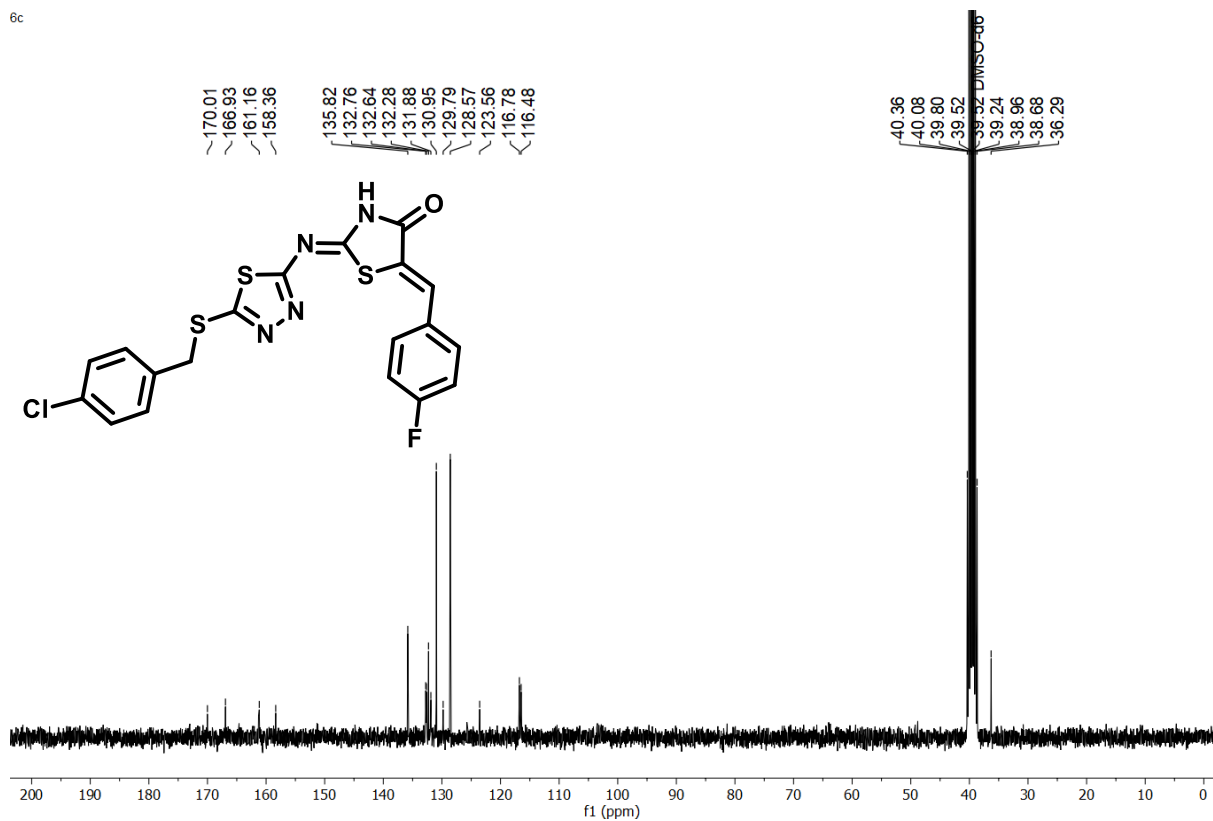S.F20'':  $^{13}\text{C NMR}$  of compound 6c

6c

---108.490

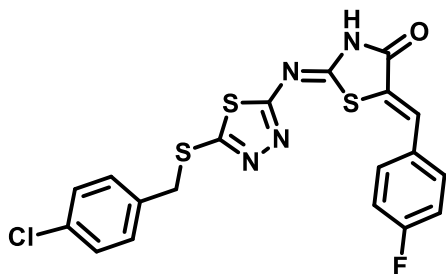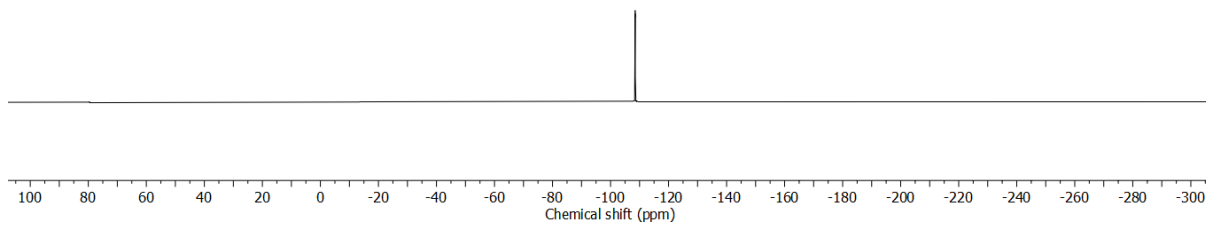

S.F20''': <sup>19</sup>F NMR of compound 6c

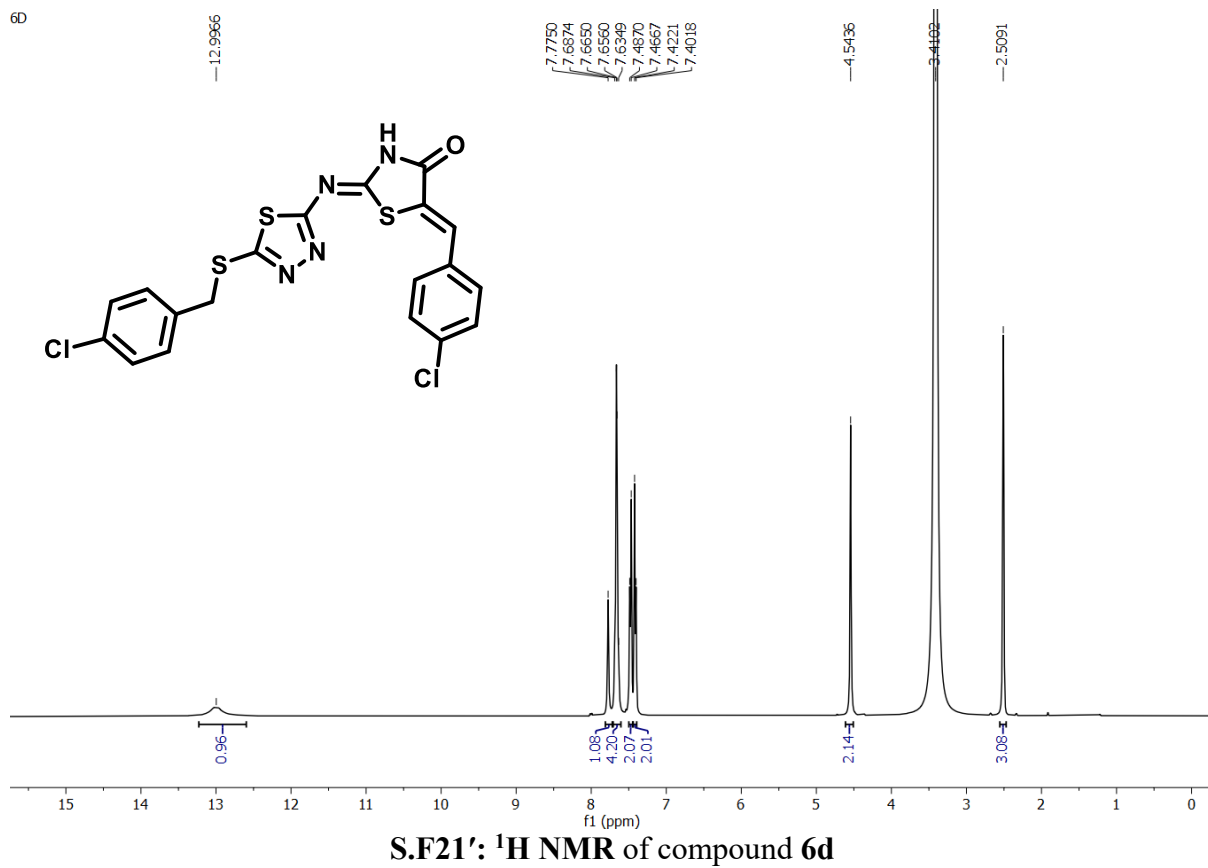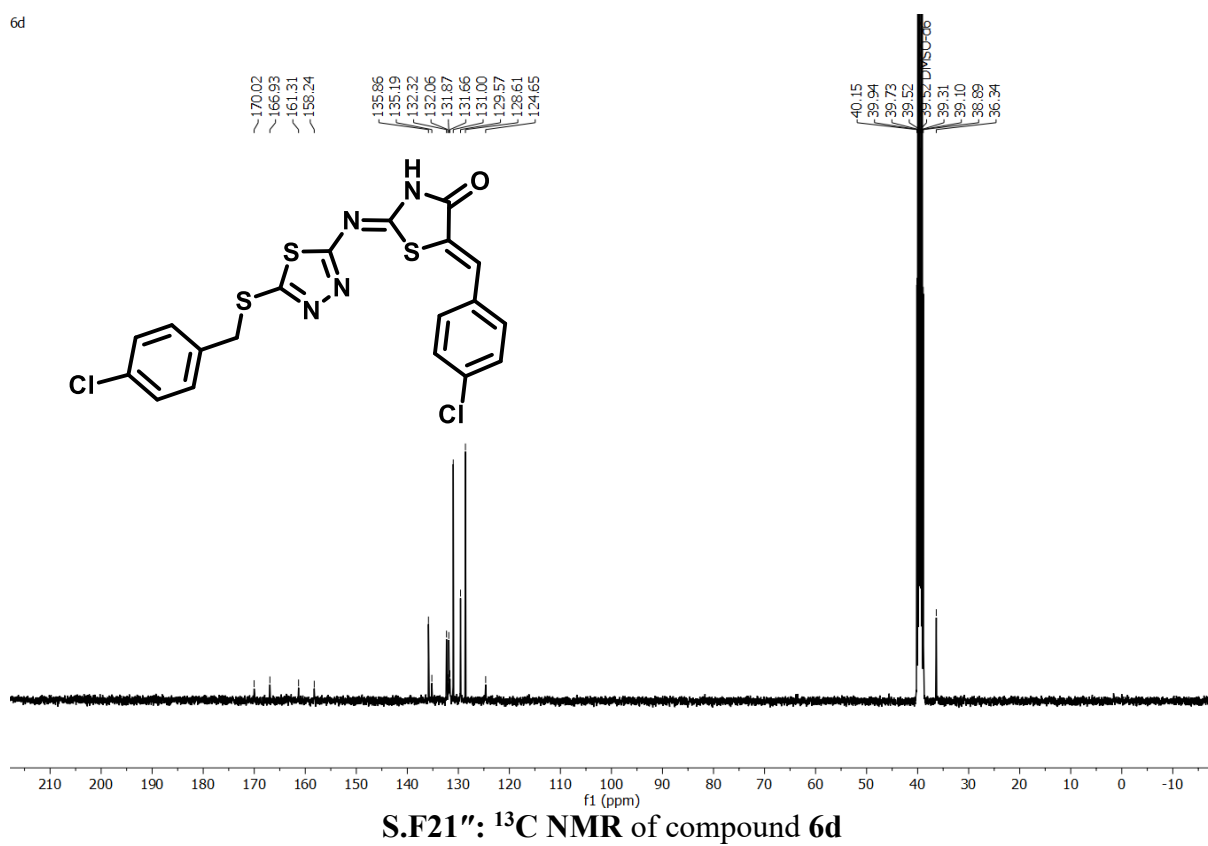

6E

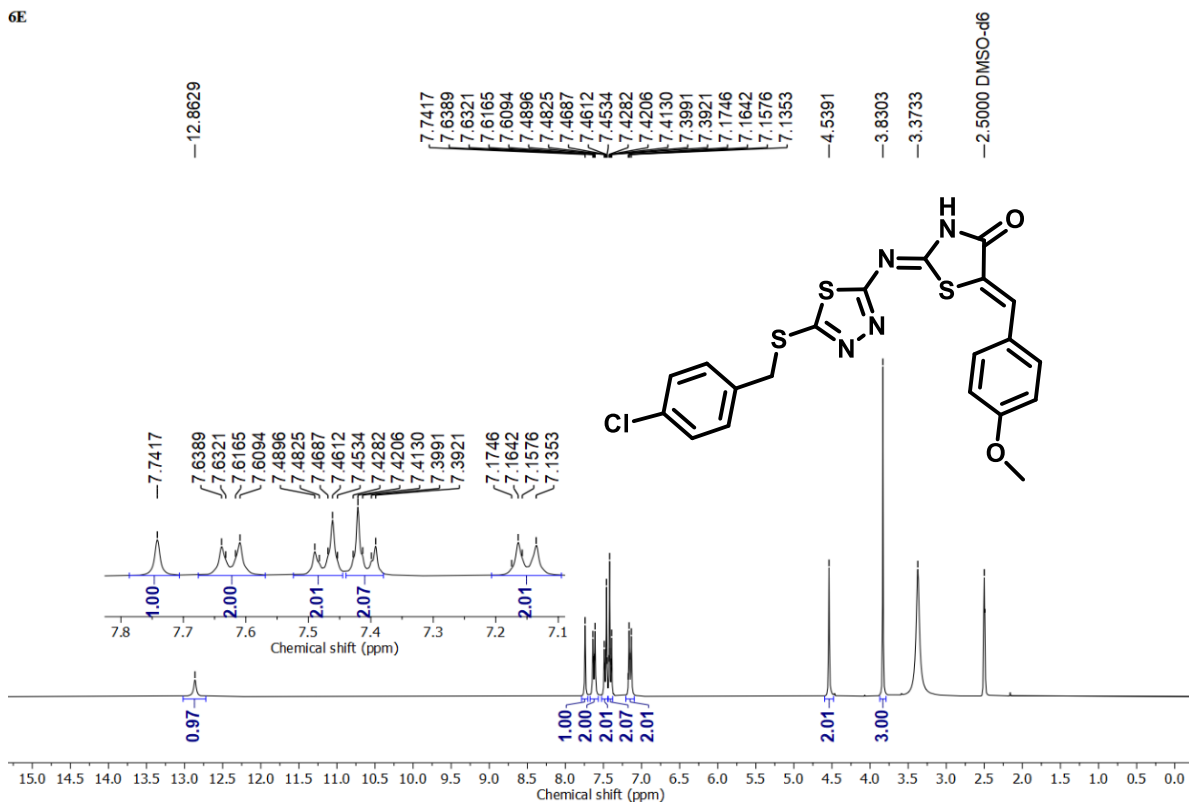S.F22': <sup>1</sup>H NMR of compound 6e

6E

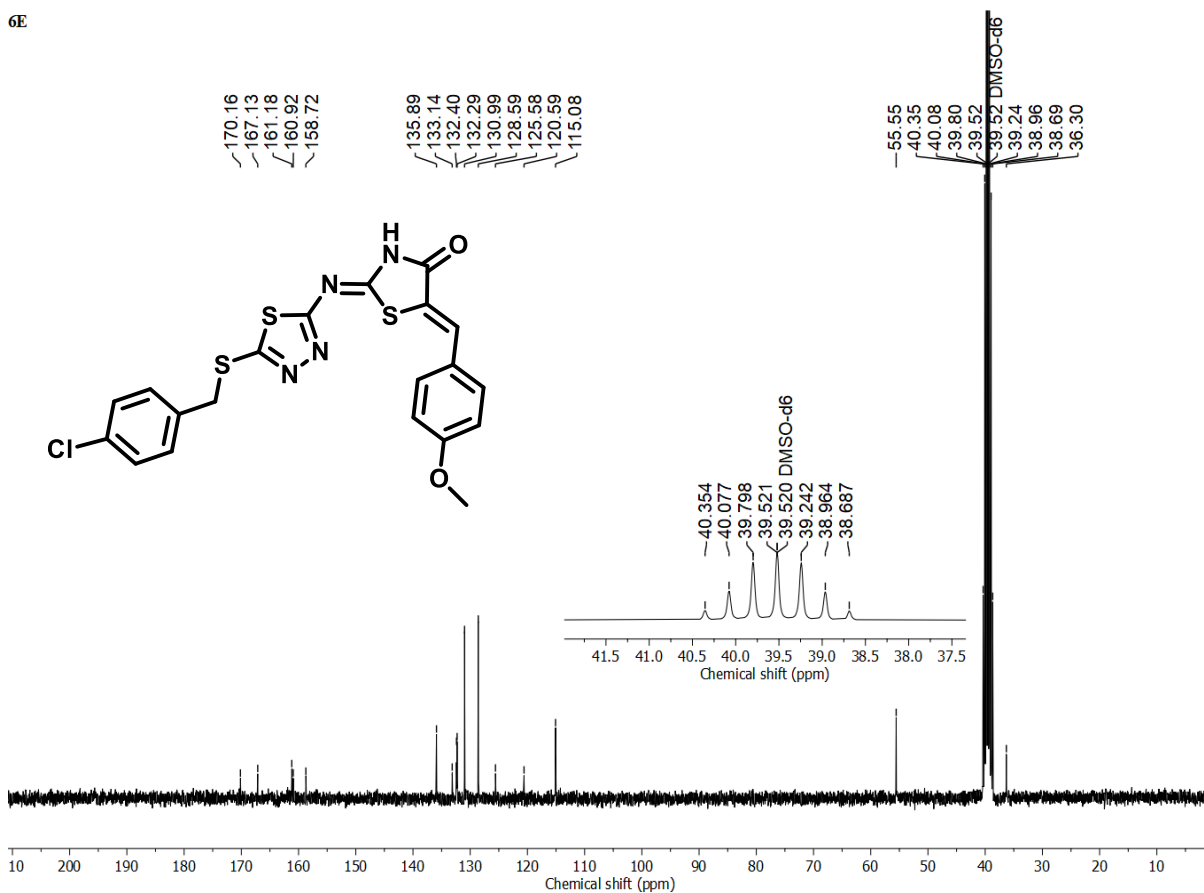S.F22'': <sup>13</sup>C NMR of compound 6e

6F

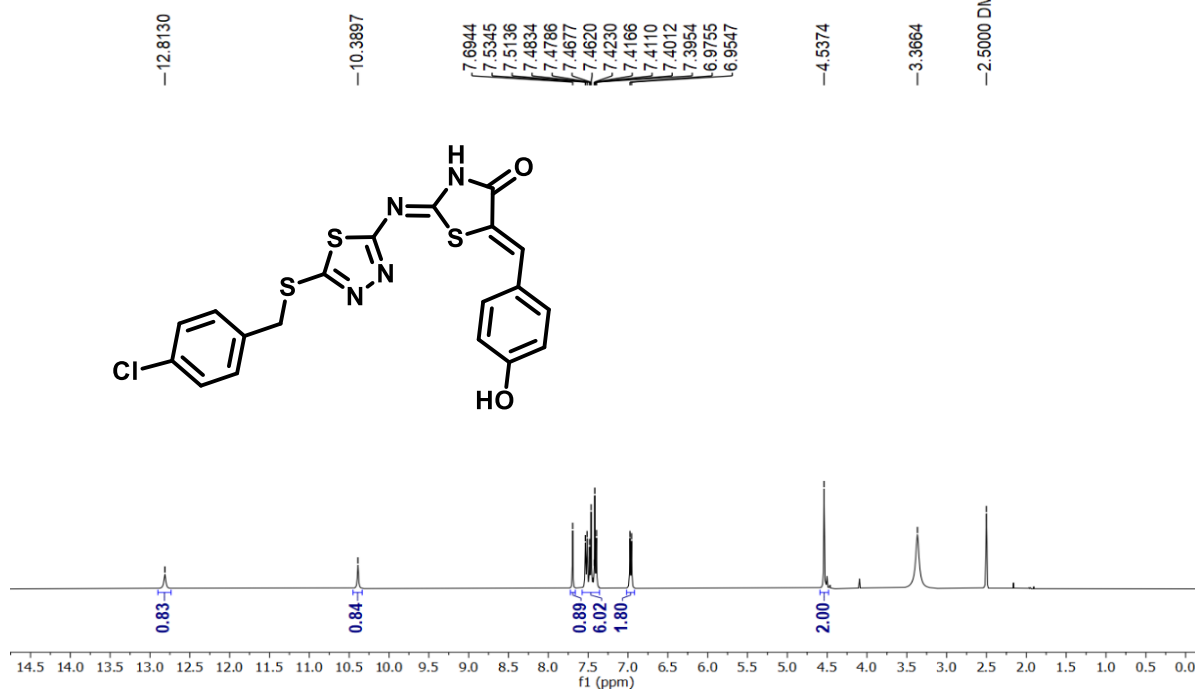S.F23':  $^1\text{H NMR}$  of compound 6f

6f

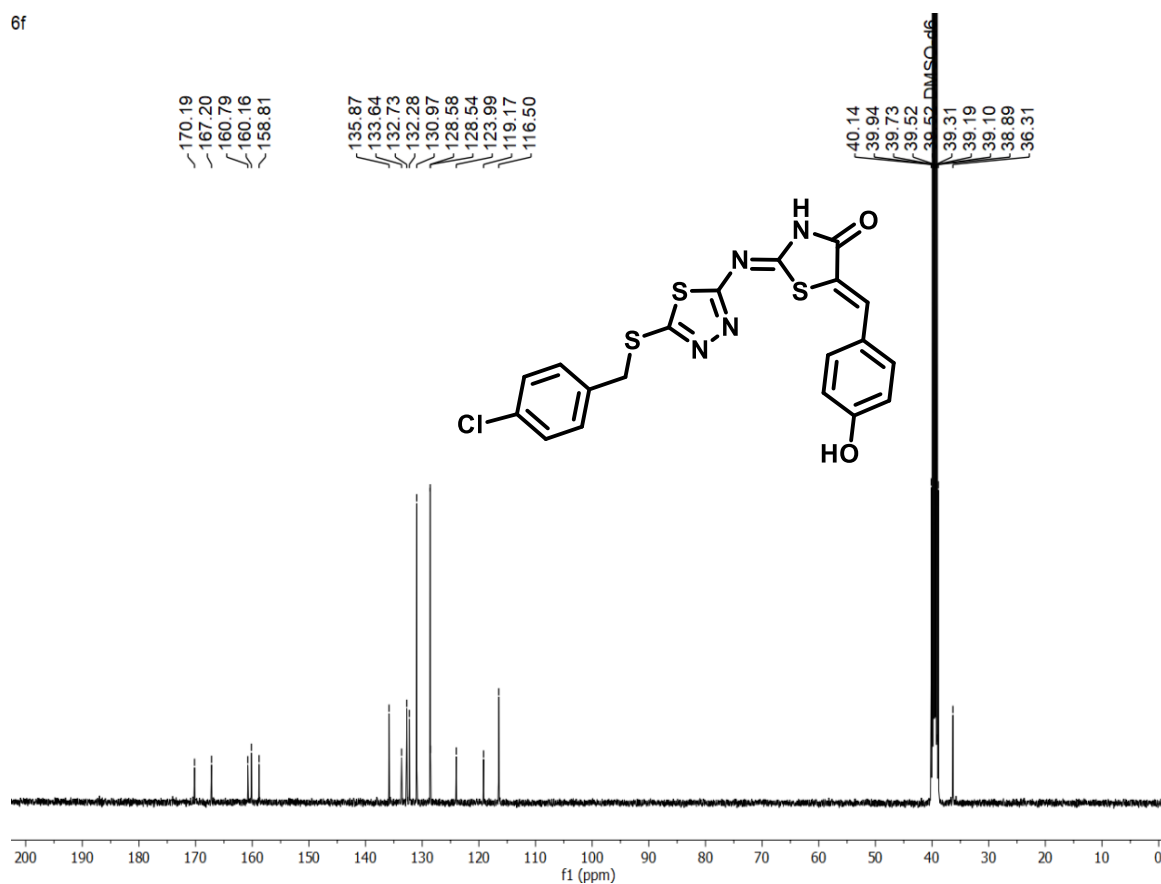S.F23'':  $^{13}\text{C NMR}$  of compound 6f

6g

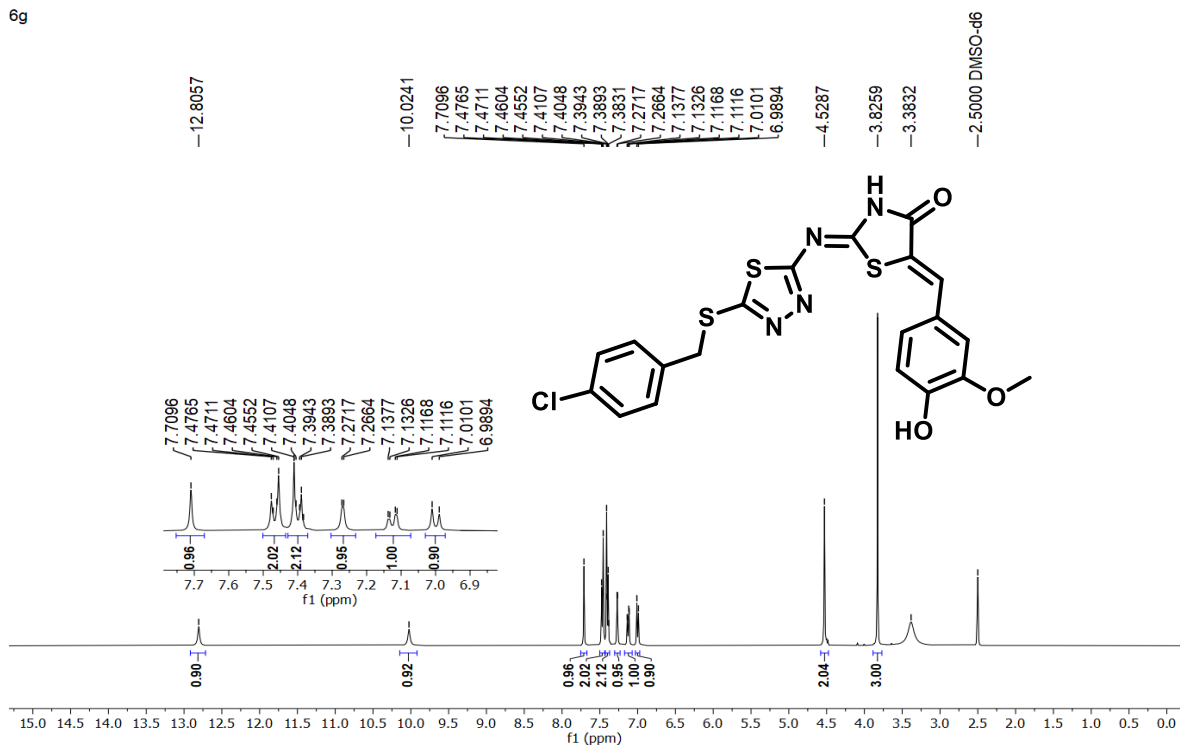S.F24':  $^1\text{H NMR}$  of compound 6g

6g

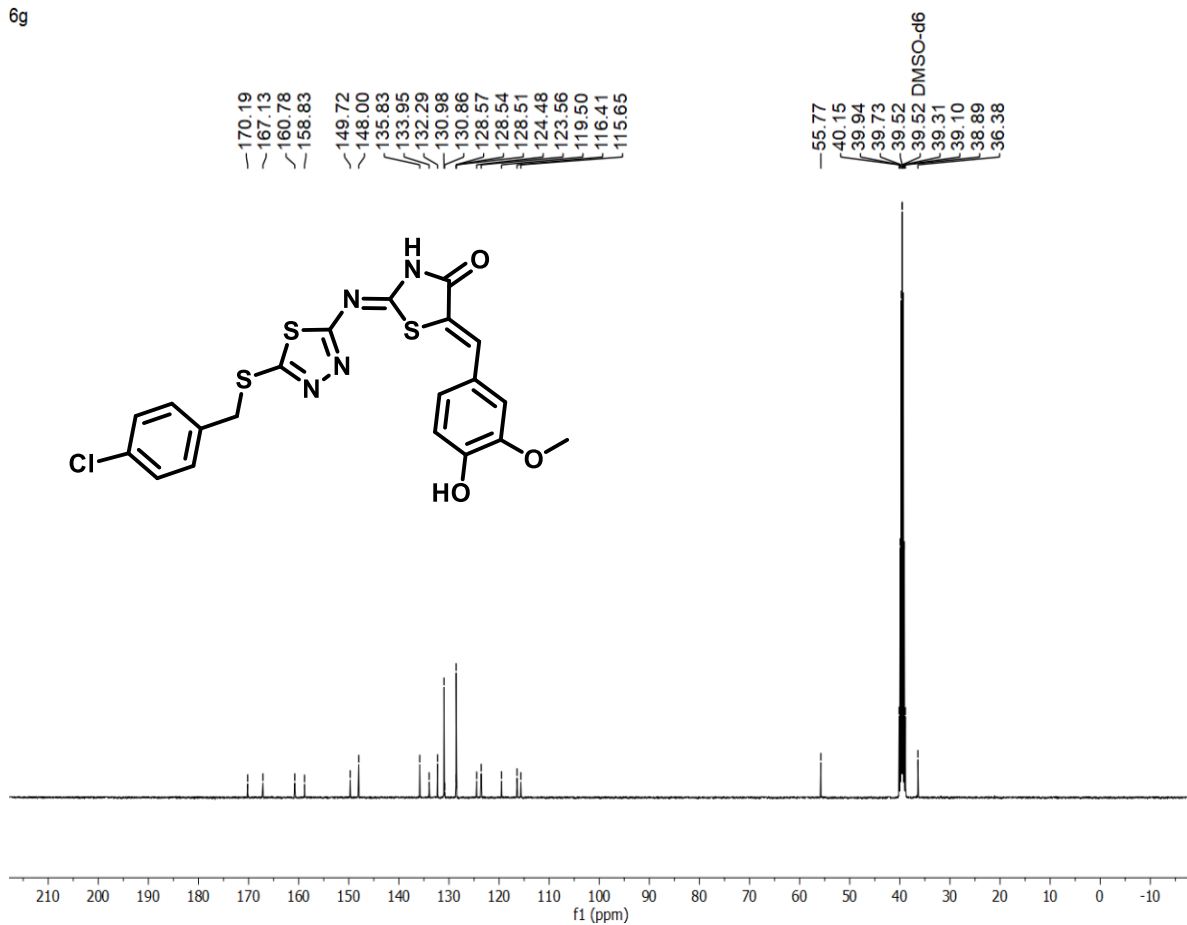S.F24'':  $^{13}\text{C NMR}$  of compound 6g

7A

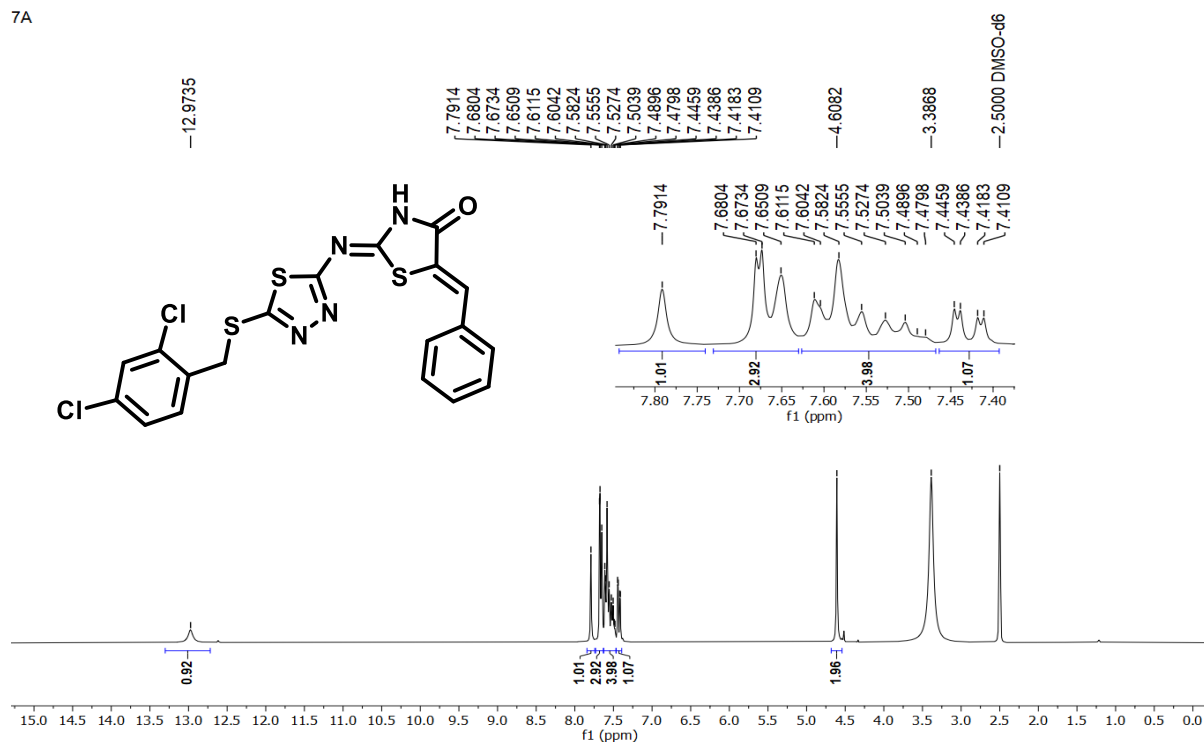S.F25':  $^1\text{H NMR}$  of compound 7a

7a

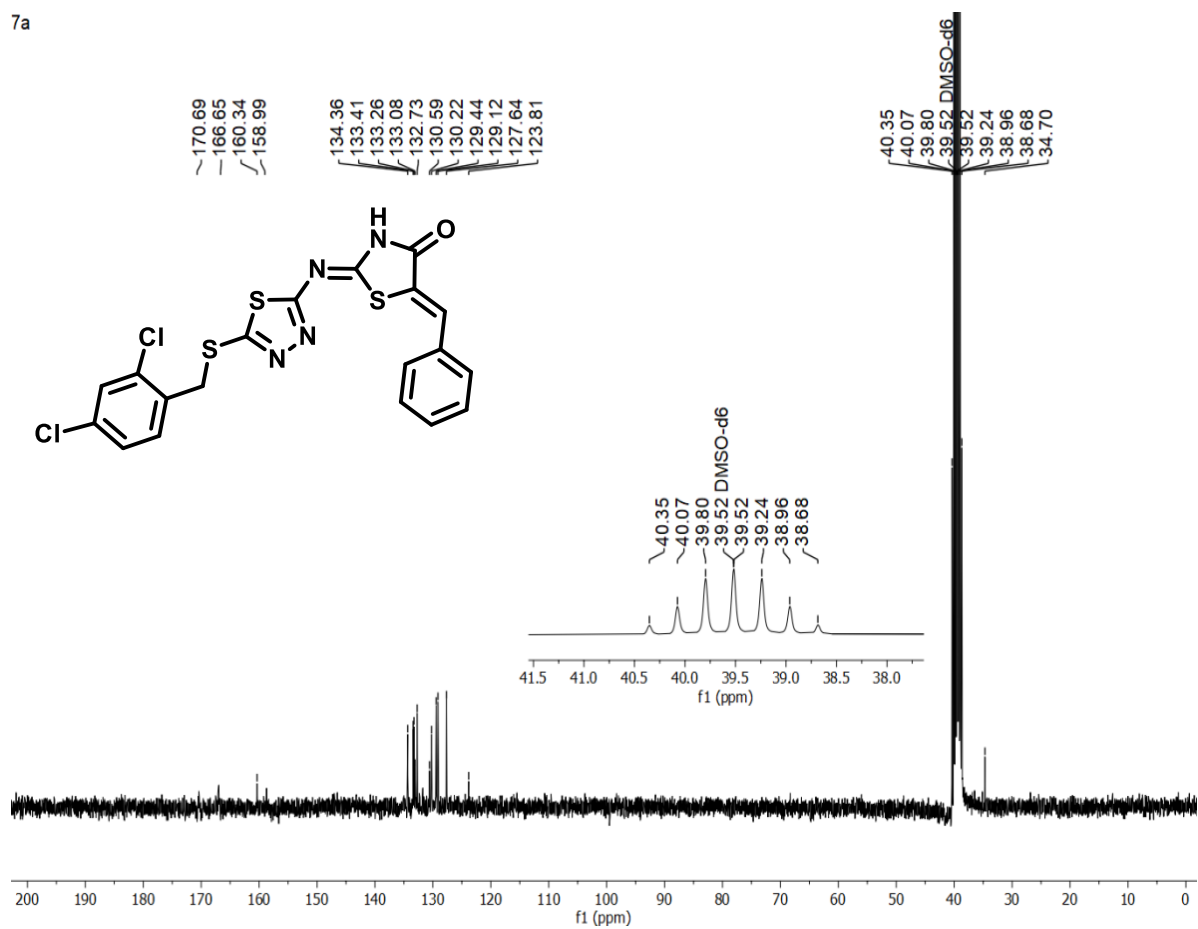S.F25'':  $^{13}\text{C NMR}$  of compound 7a

7b

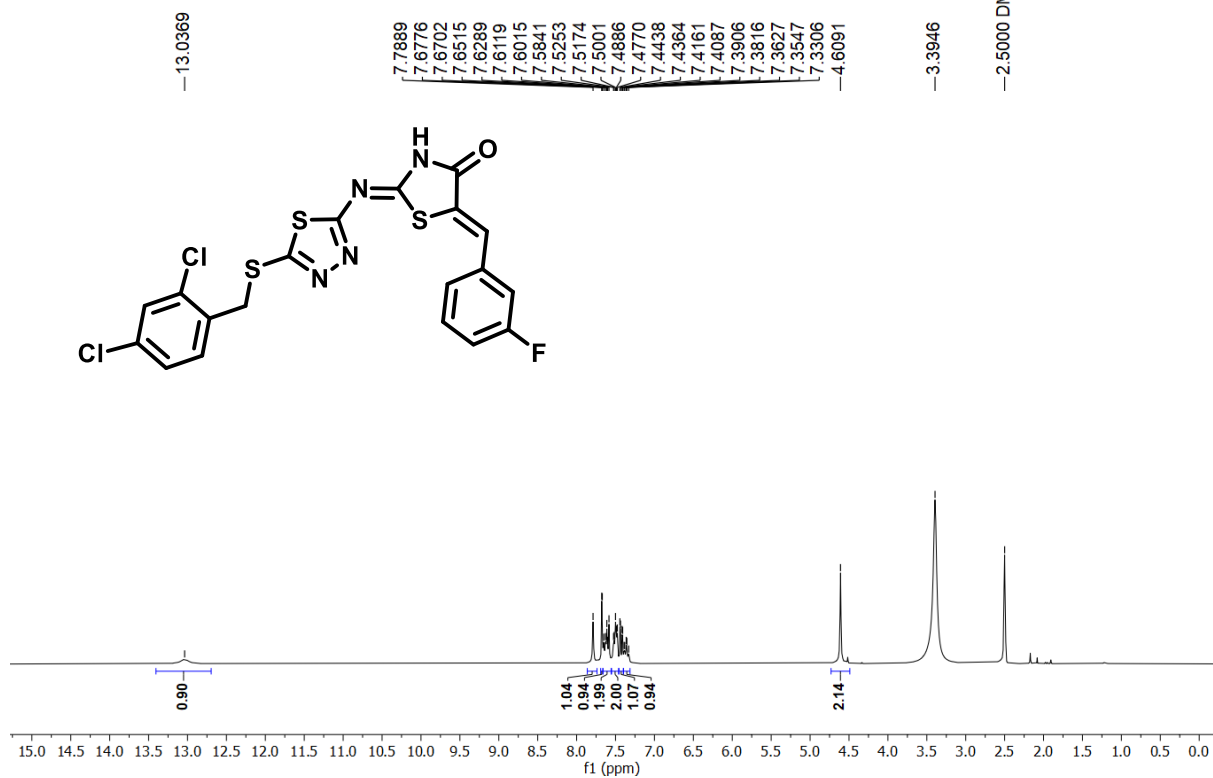S.F26': <sup>1</sup>H NMR of compound 7b

7b

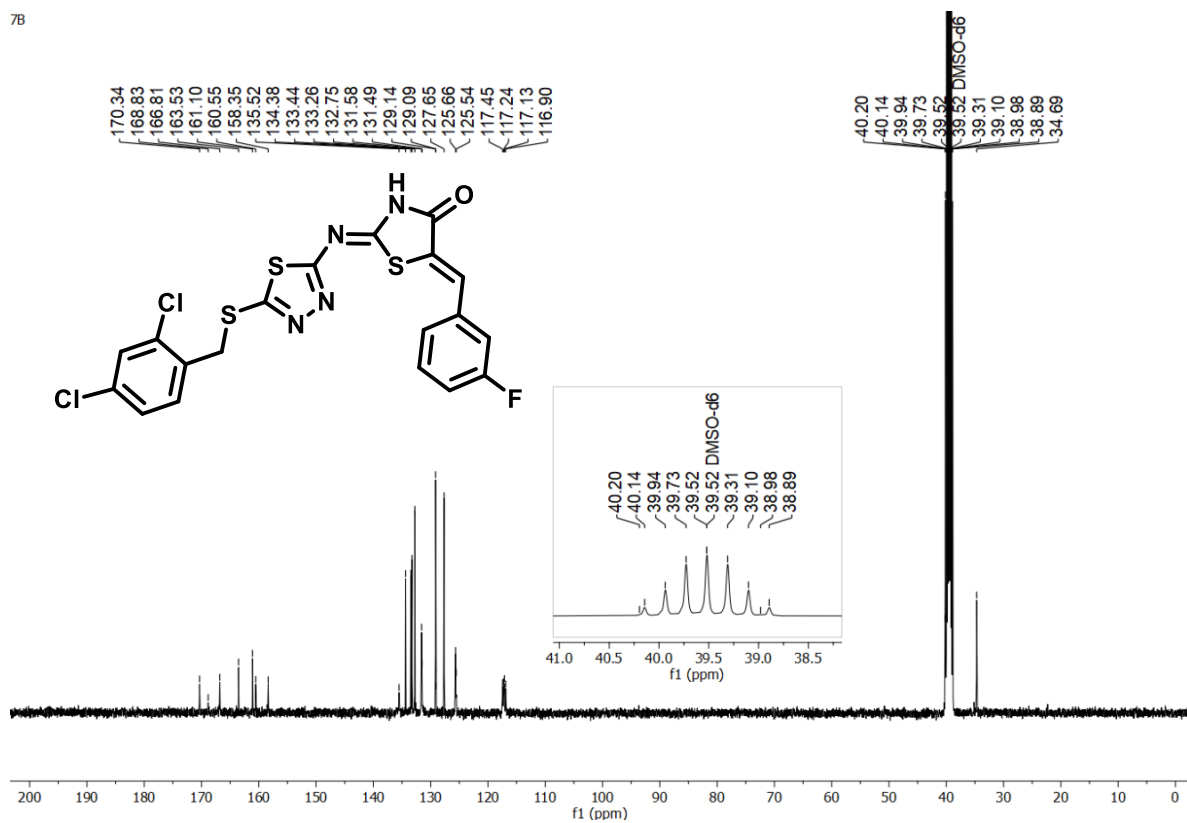S.F26'': <sup>13</sup>C NMR of compound 7b



7B

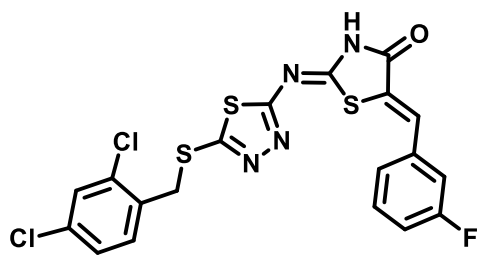

--111.587

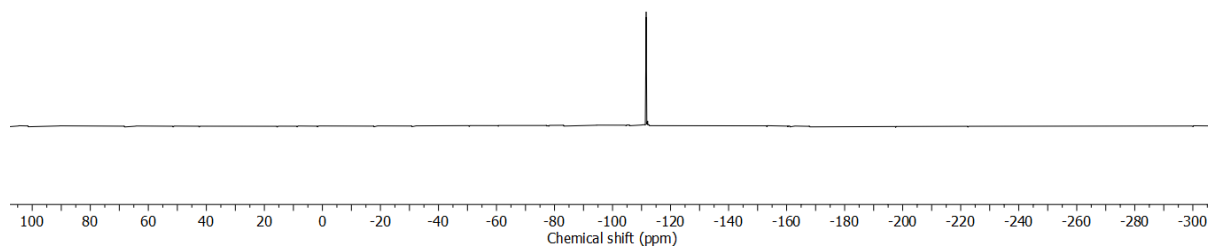

S.F26''':  $^{19}\text{F}$  NMR compound 7b

7c

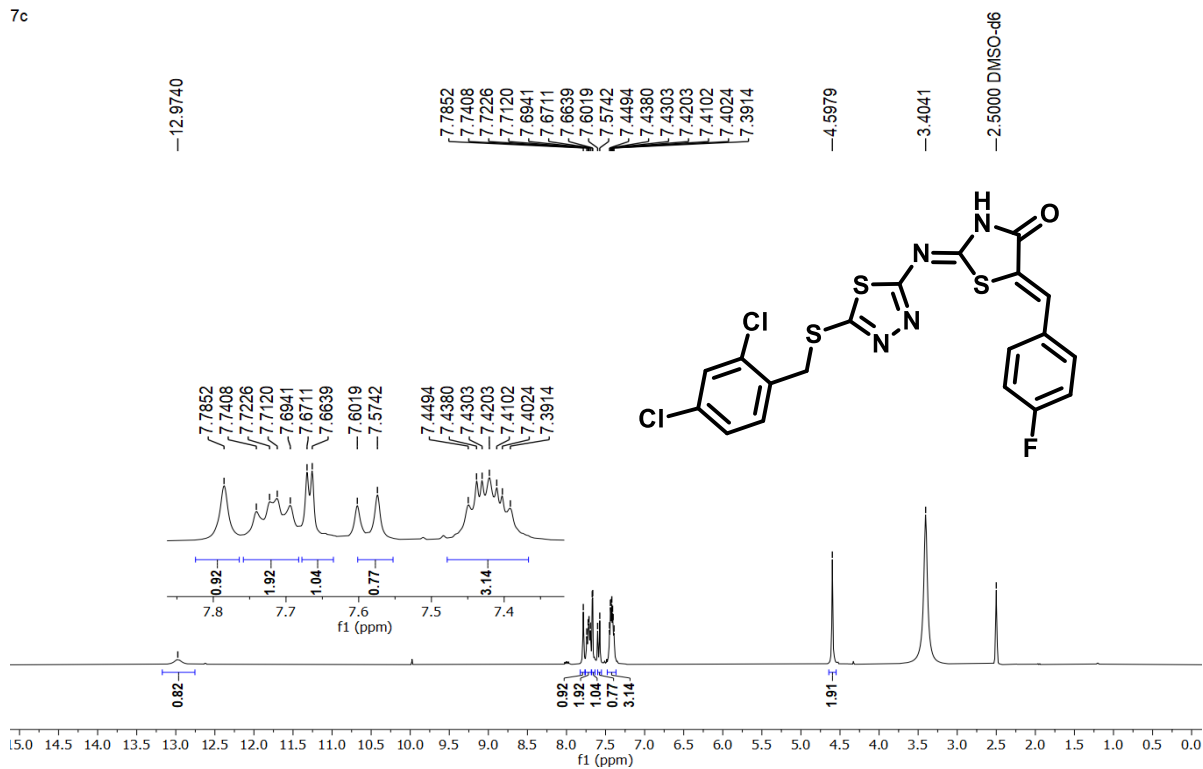S.F27': <sup>1</sup>H NMR of compound 7c

7c

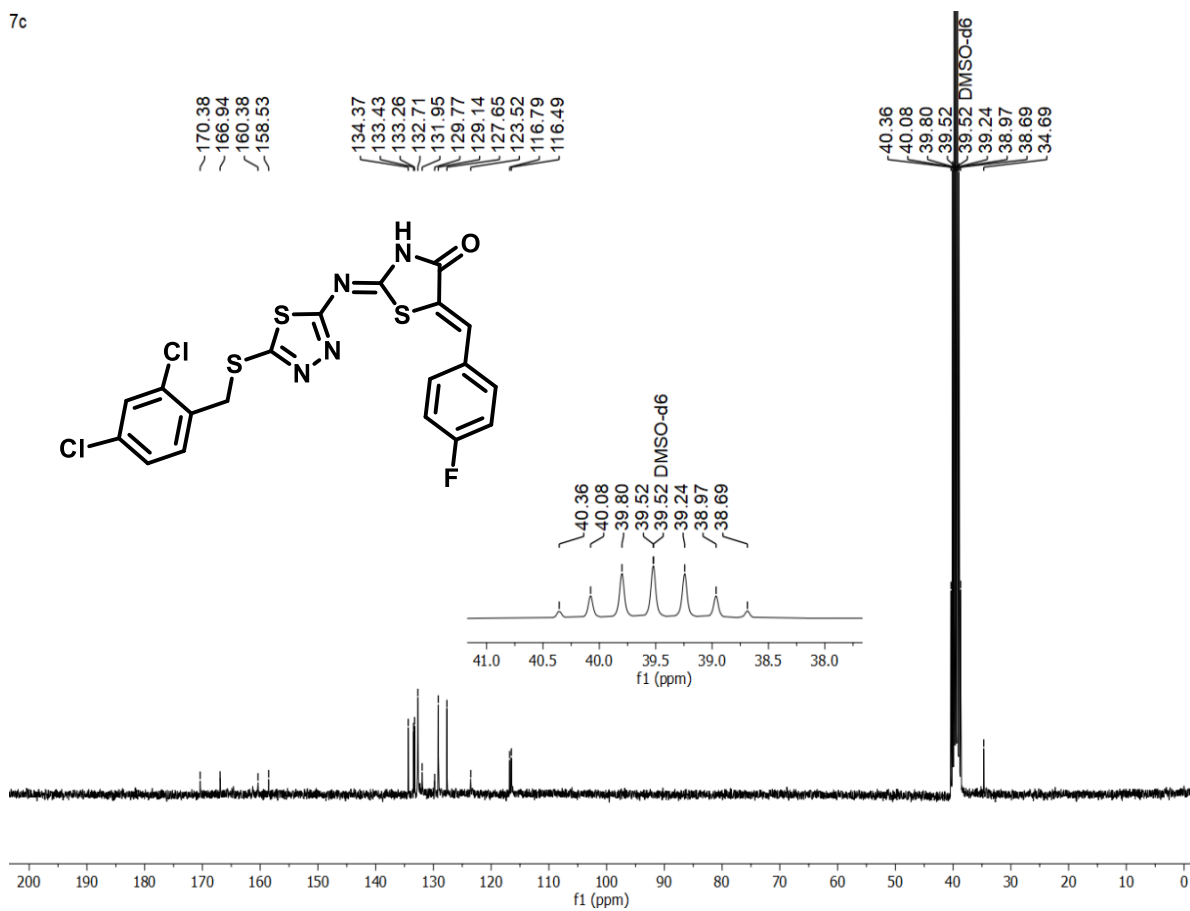S.F27'': <sup>13</sup>C NMR of compound 7c

7c

-108.458

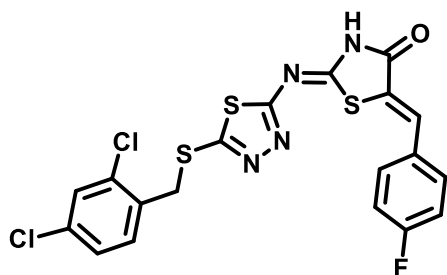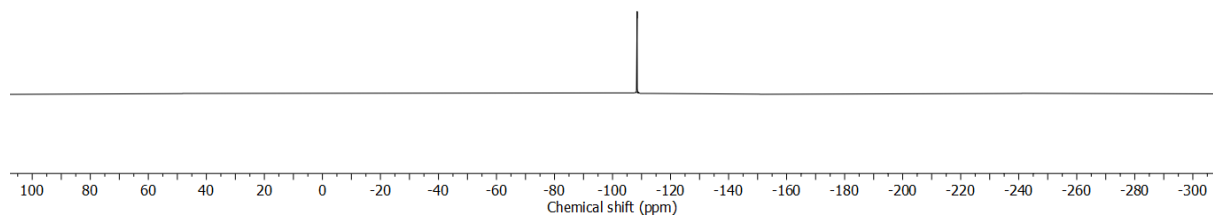

S.F27''':  $^{19}\text{F}$  NMR of compound 7c

7d

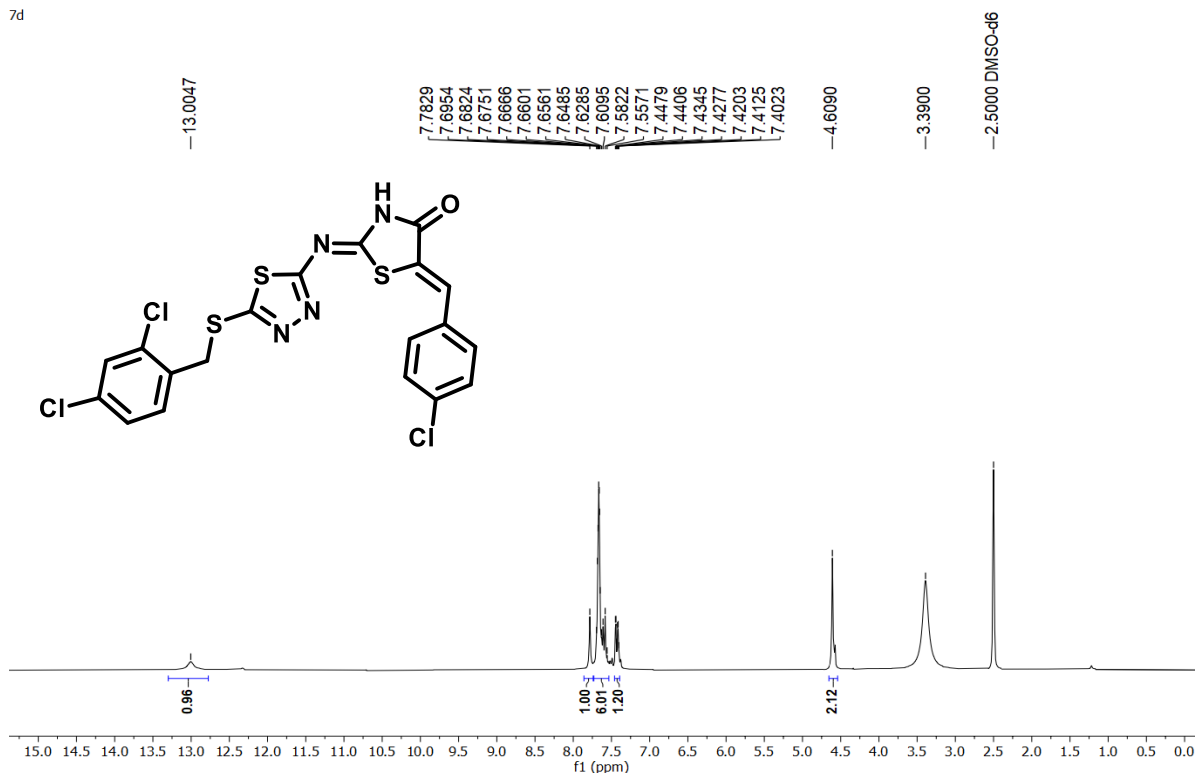S.F28': <sup>1</sup>H NMR of compound 7d

7d

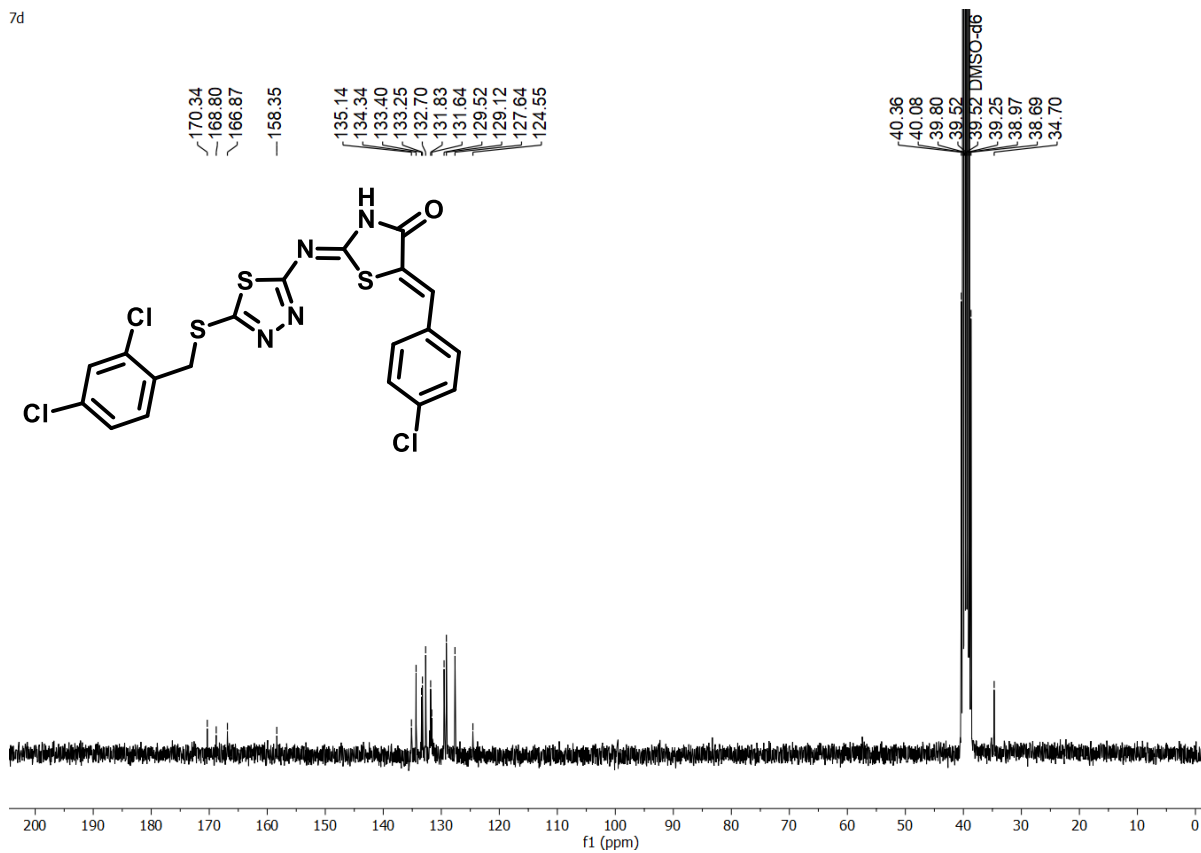S.F28'': <sup>13</sup>C NMR of compound 7d

7E

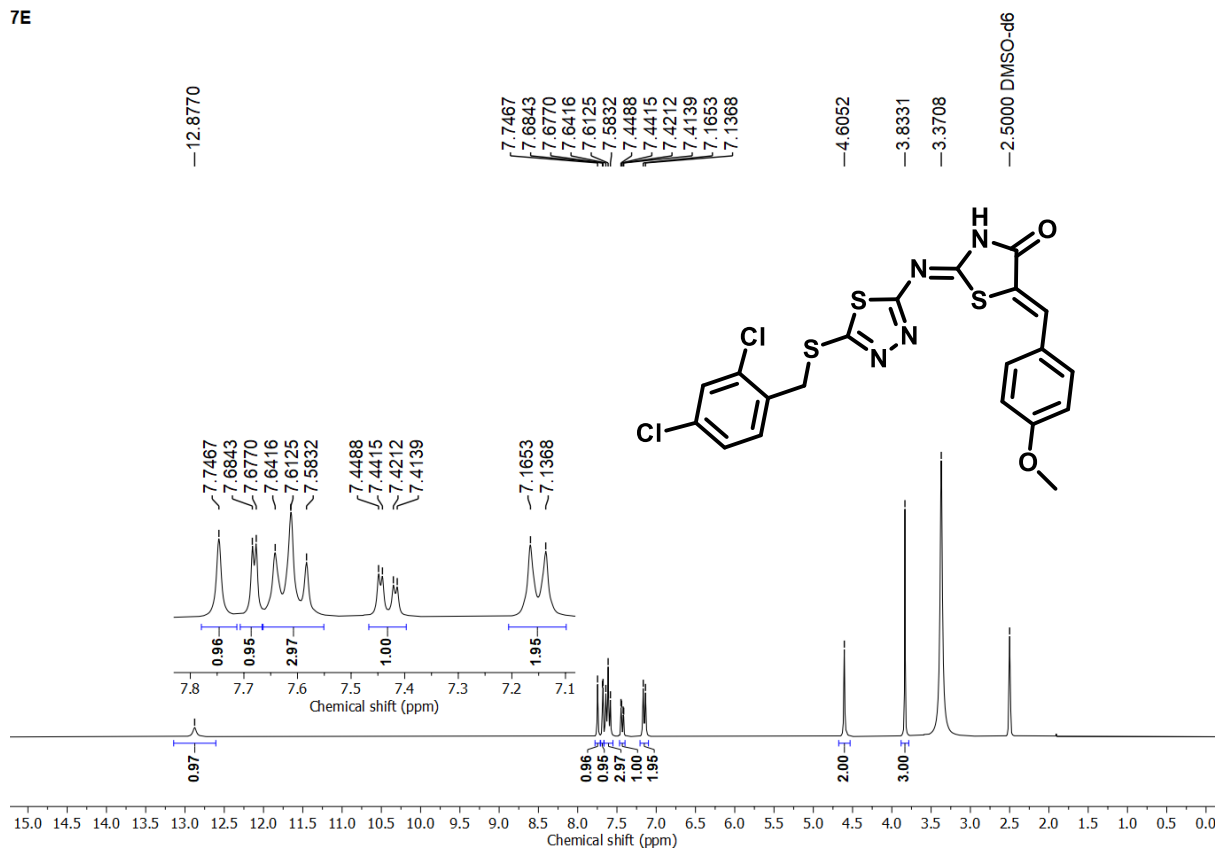S.F29': <sup>1</sup>H NMR of compound 7e

7E

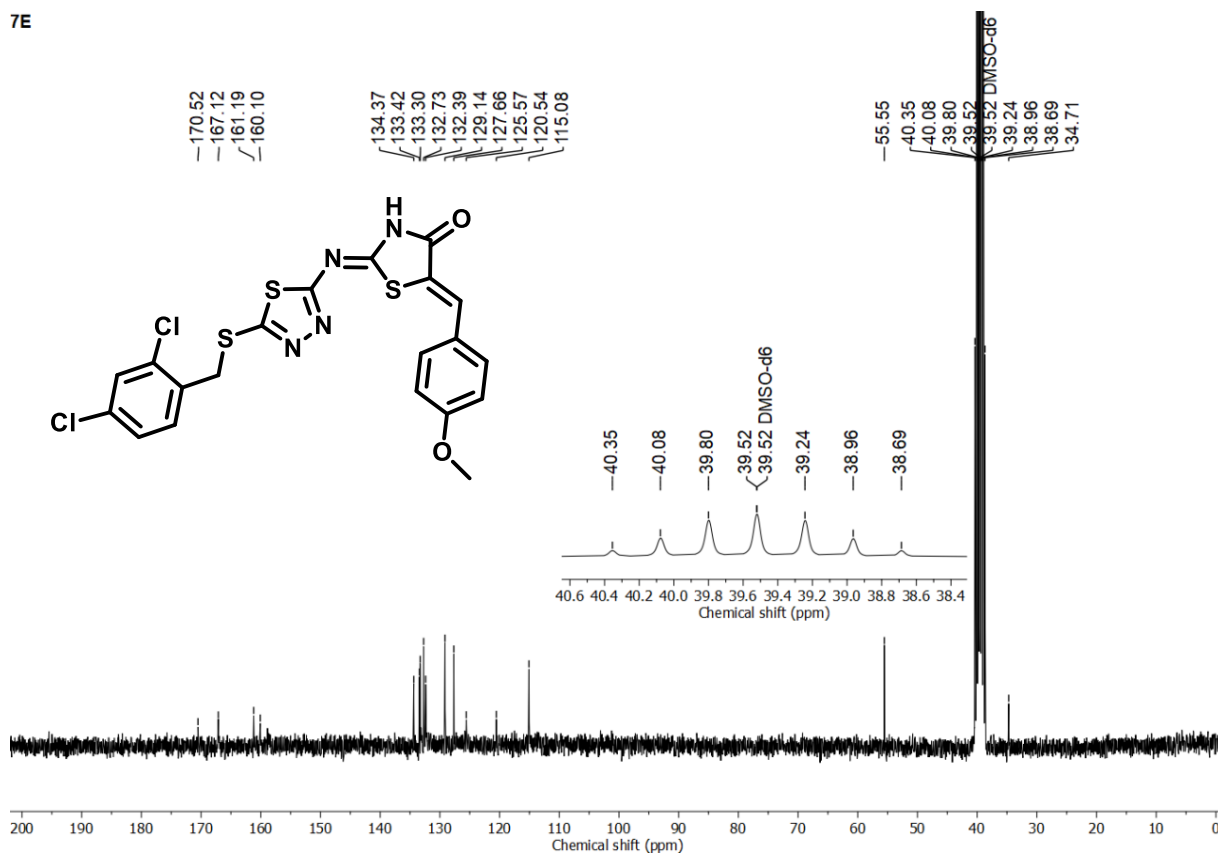S.F29'': <sup>13</sup>C NMR of compound 7e

7f

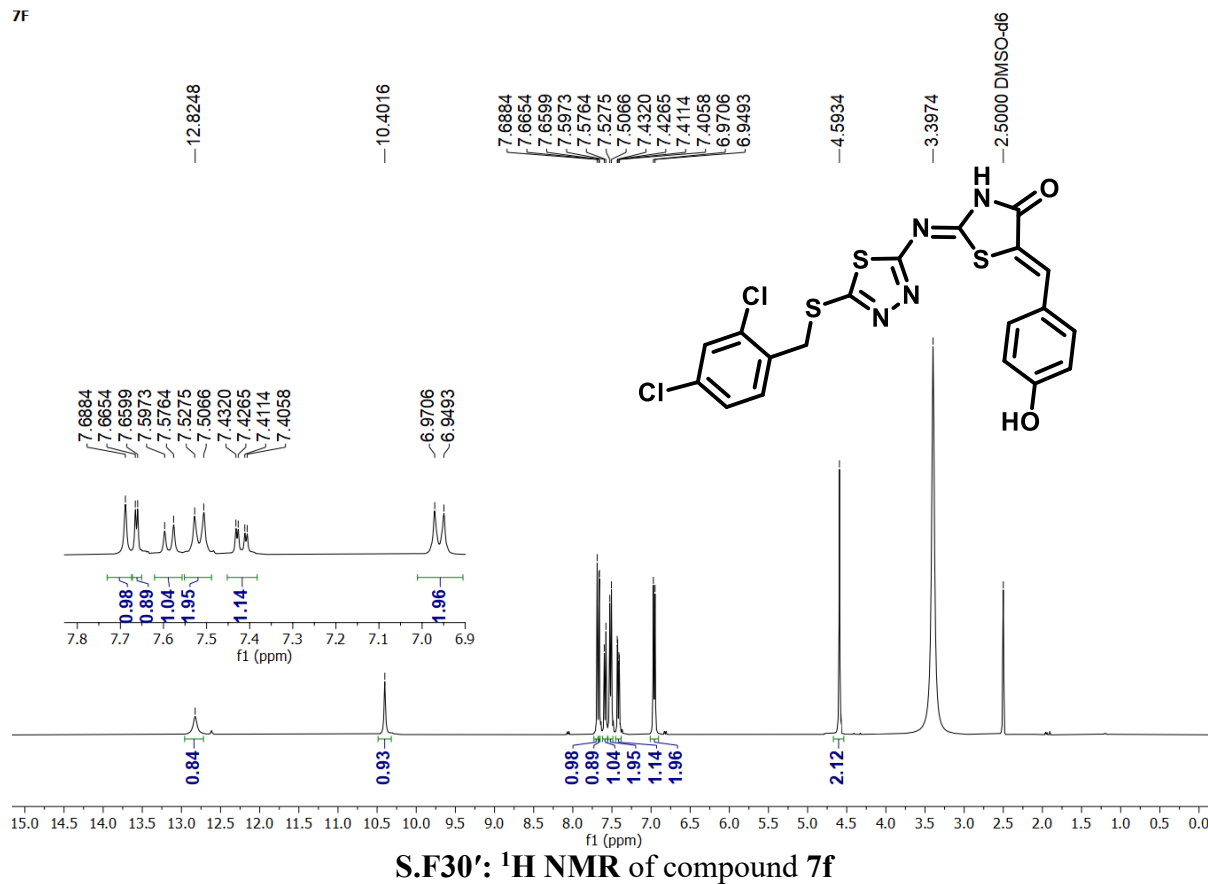

7f

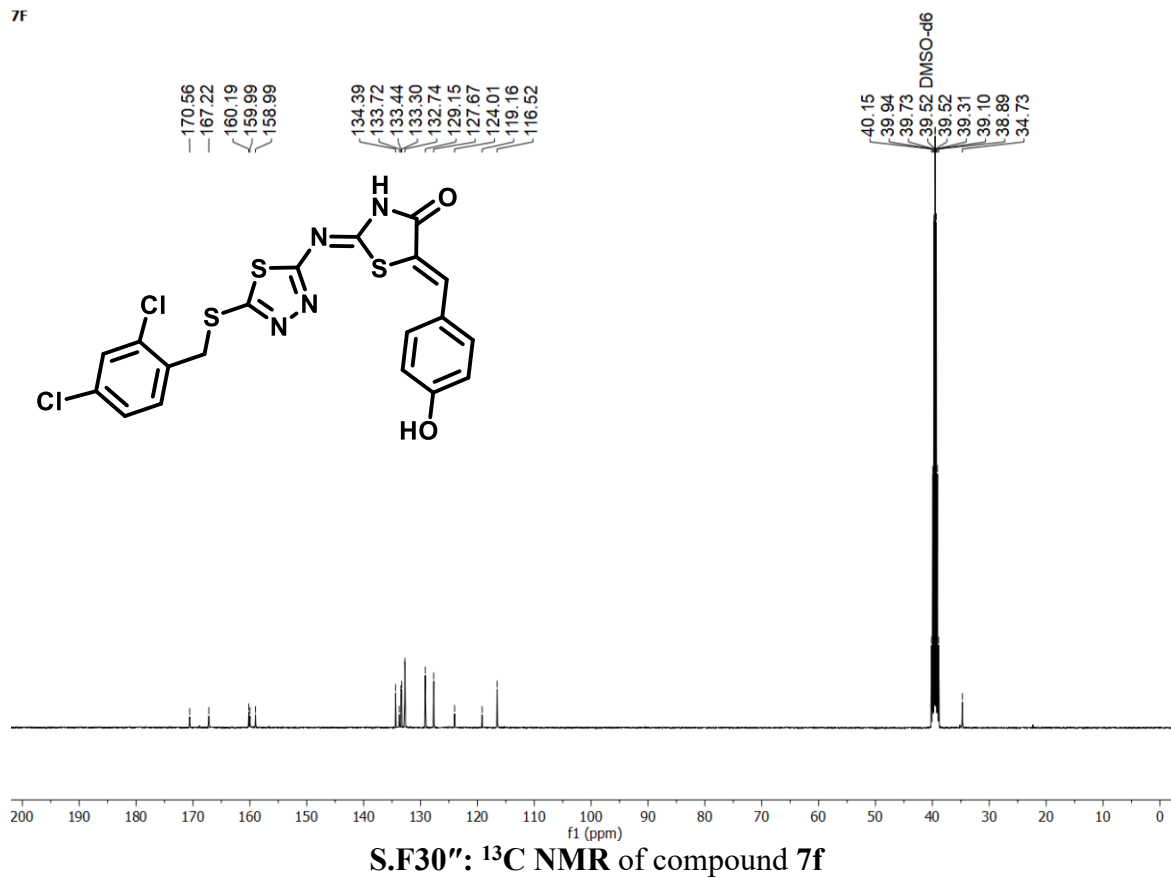

7g

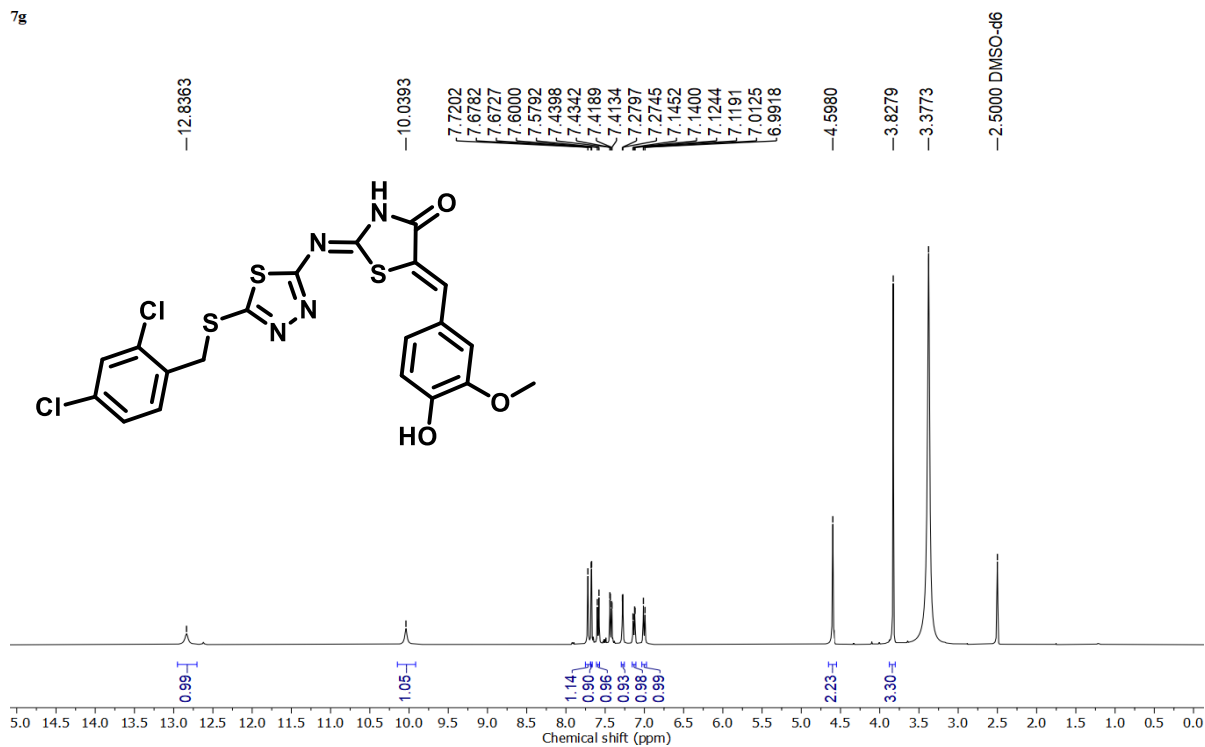S.F31':  $^1\text{H NMR}$  of compound 7g

7g

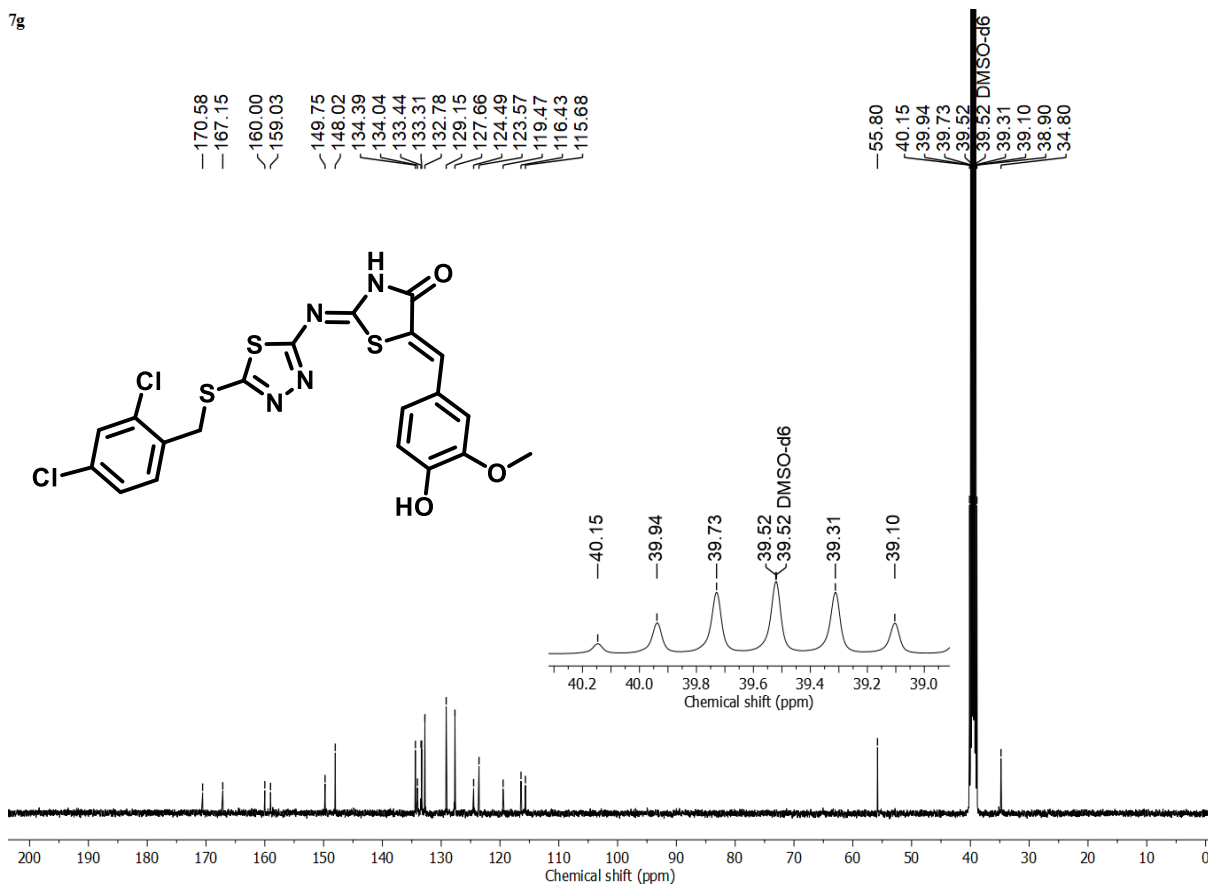S.F31'':  $^{13}\text{C NMR}$  of compound 7g

## Copy of HRMS Data (Final Compounds):

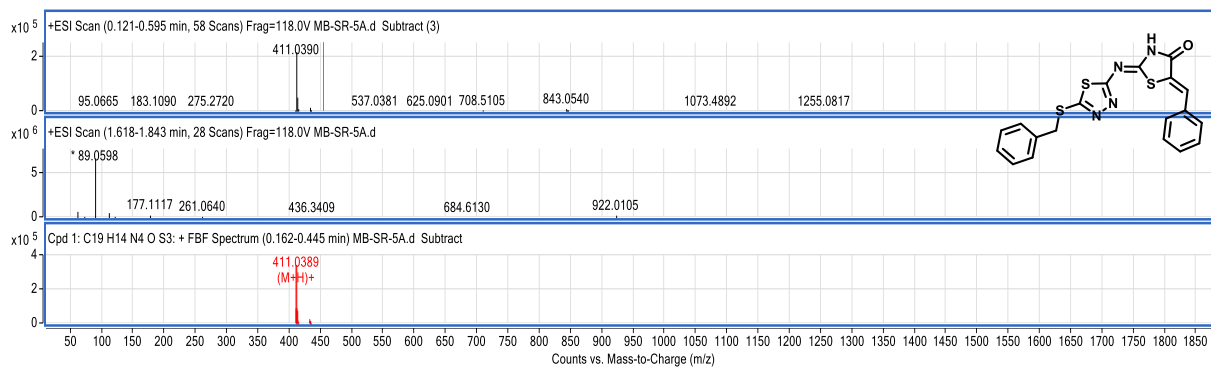

### S.F32: HRMS Compound 5a

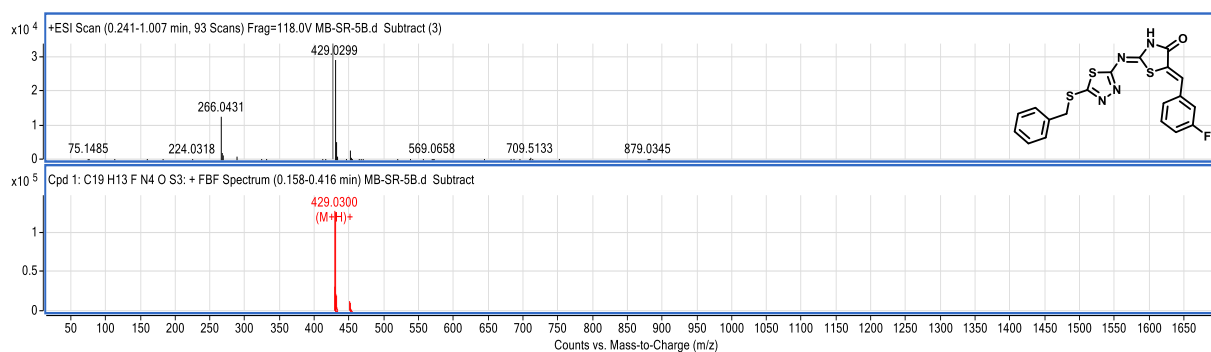

### S.F33: HRMS Compound 5b

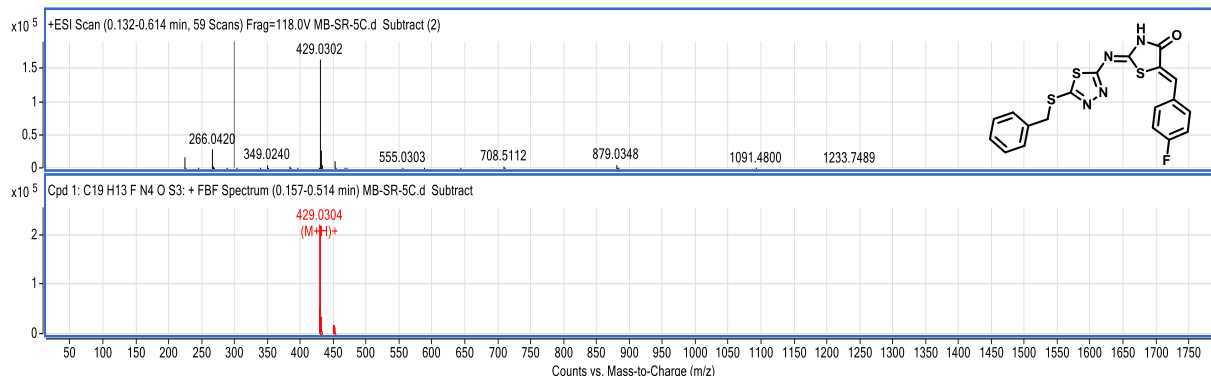

### S.F34: HRMS Compound 5c

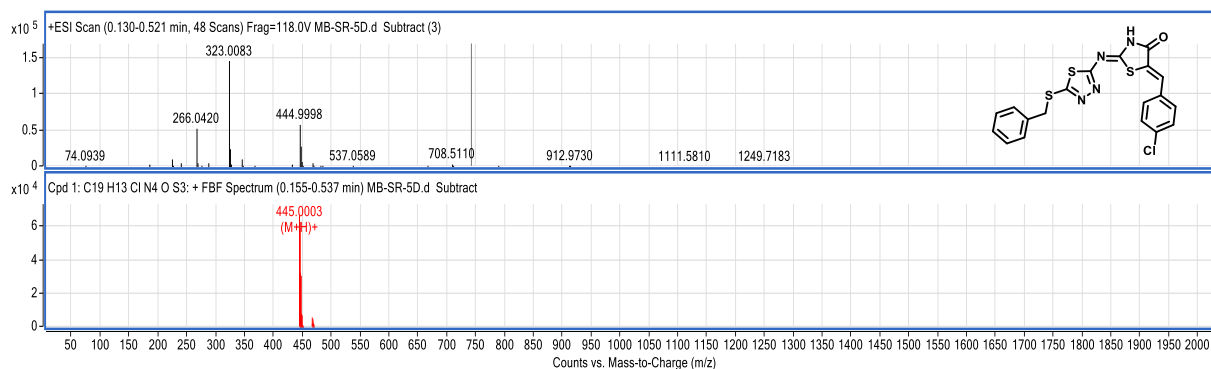

### S.F35: HRMS Compound 5d



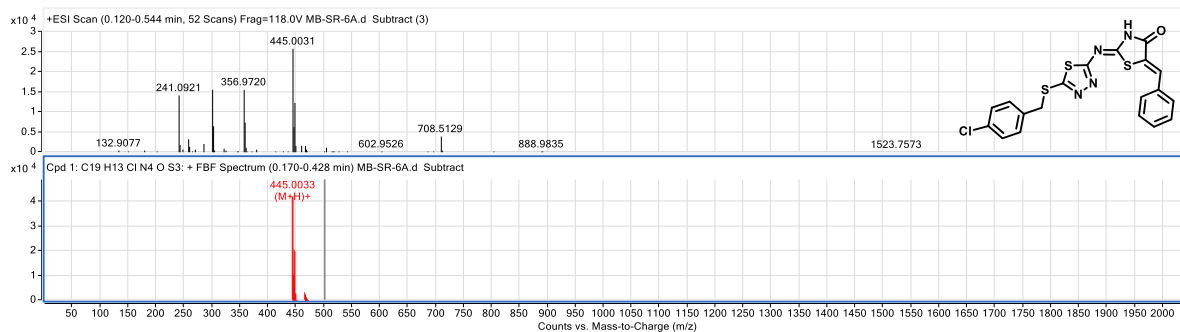

**S.F36: HRMS Compound 6a**

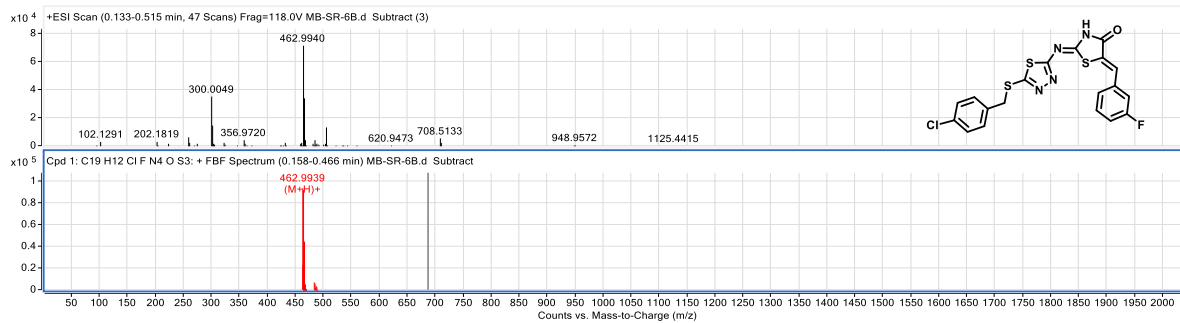

**S.F37: HRMS Compound 6b**

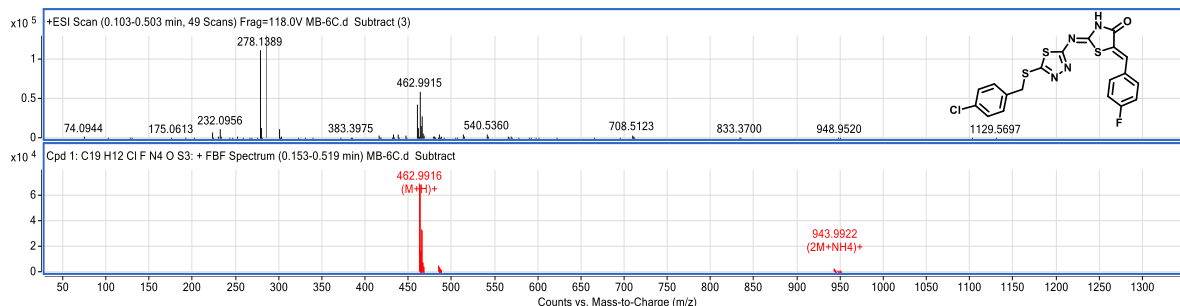

**S.F38: HRMS Compound 6c**

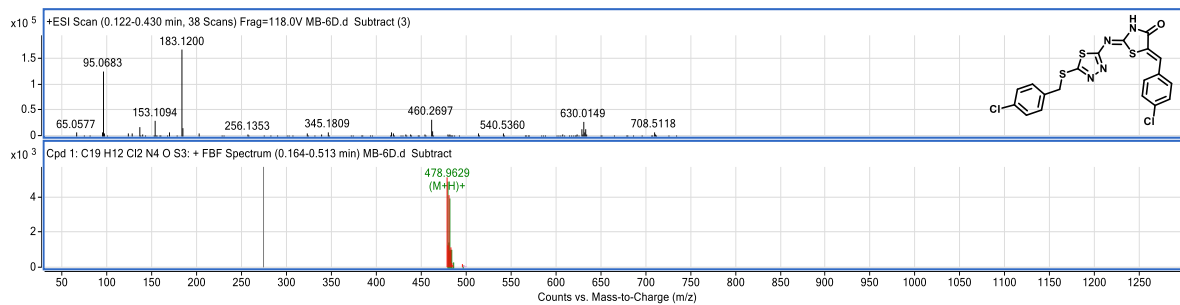

**S.F39: HRMS Compound 6d**

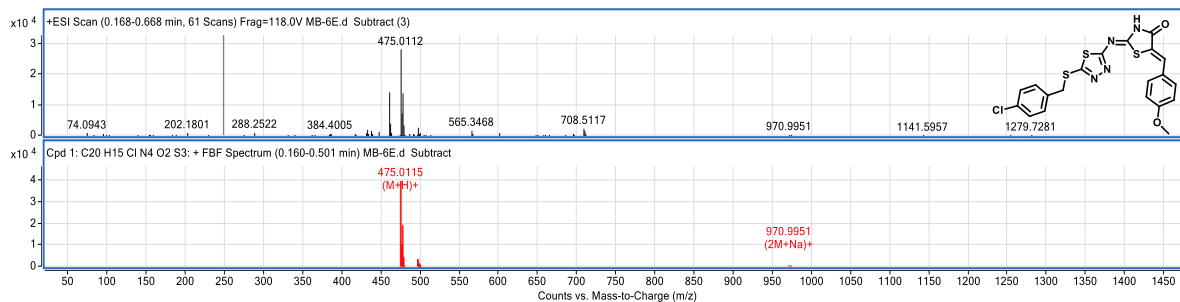

**S.F40: HRMS Compound 6e**

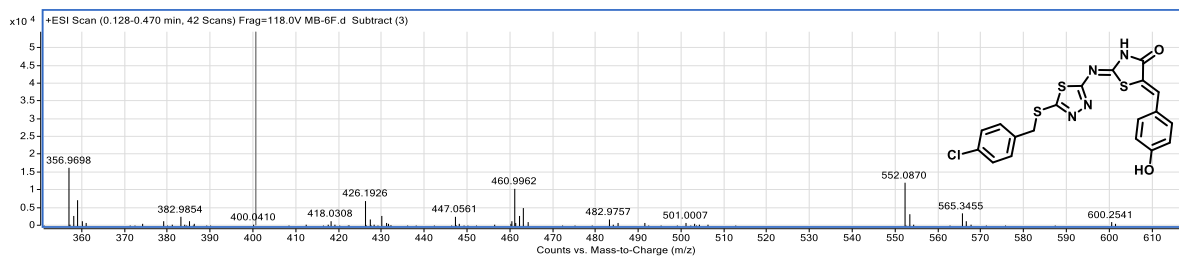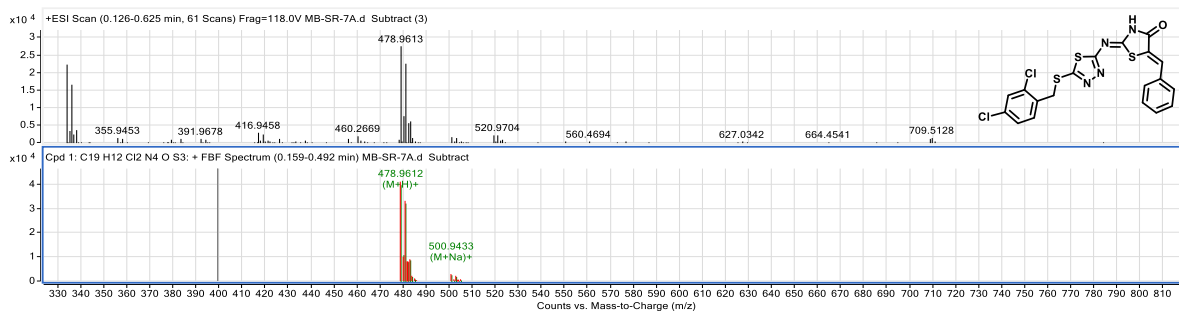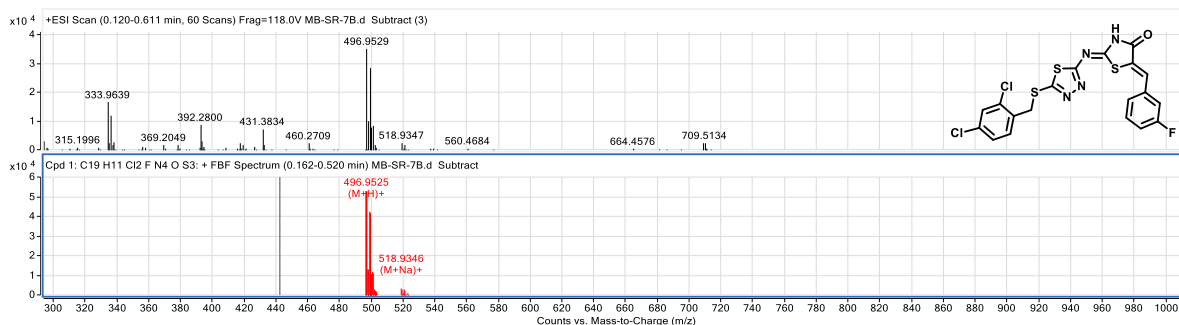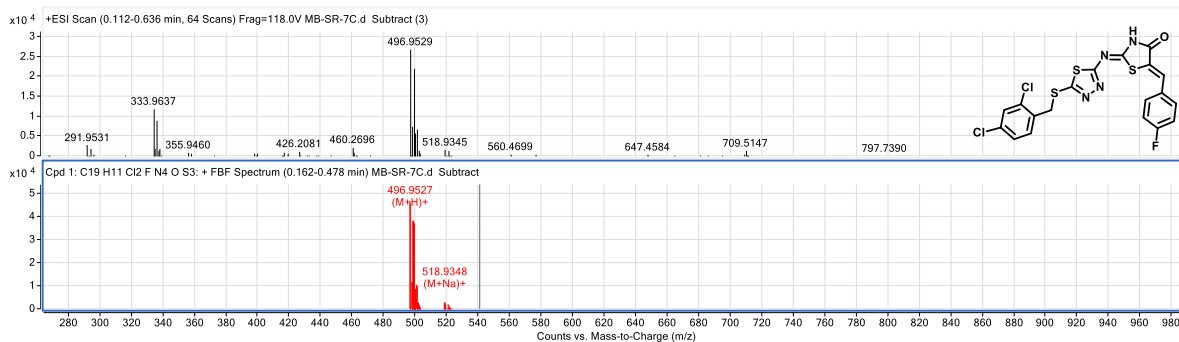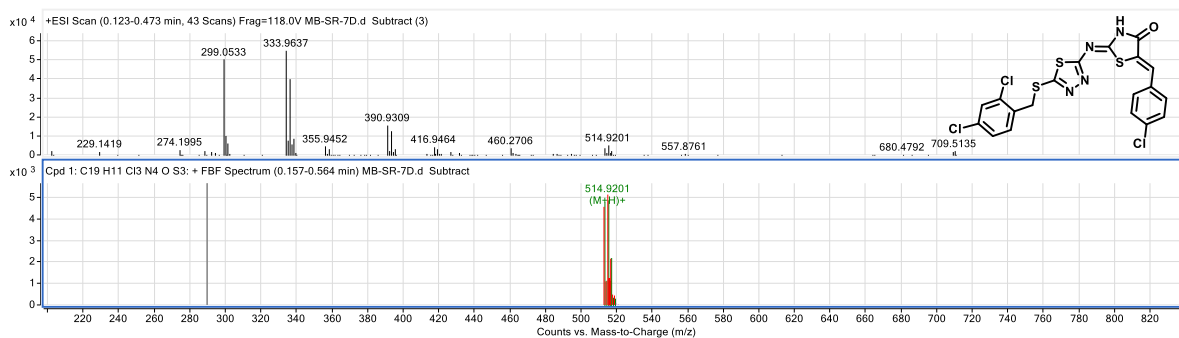

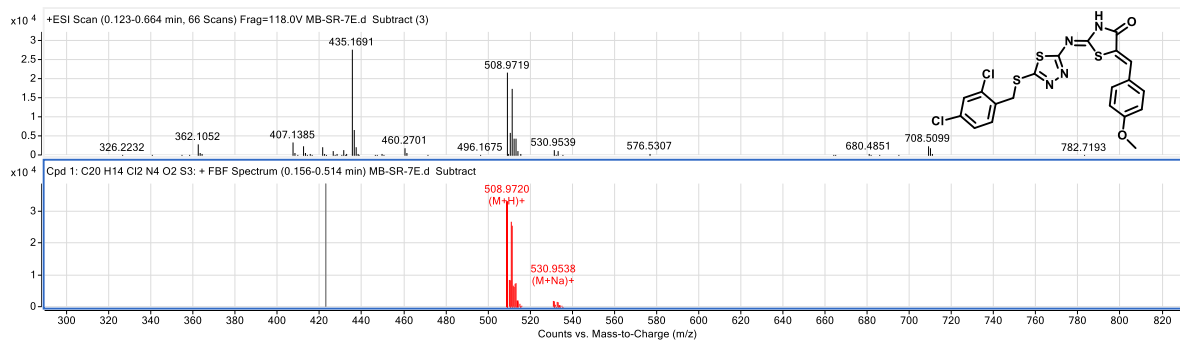

**S.F46: HRMS Compound 7e**

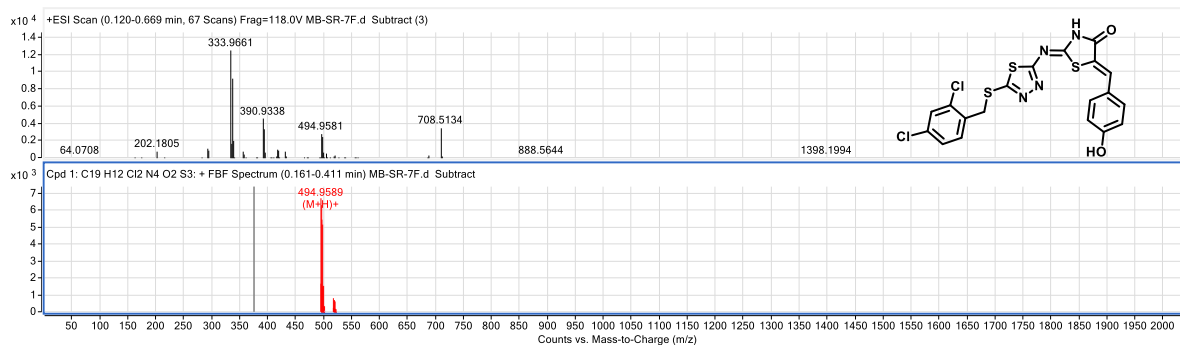

**S.F47: HRMS Compound 7f**

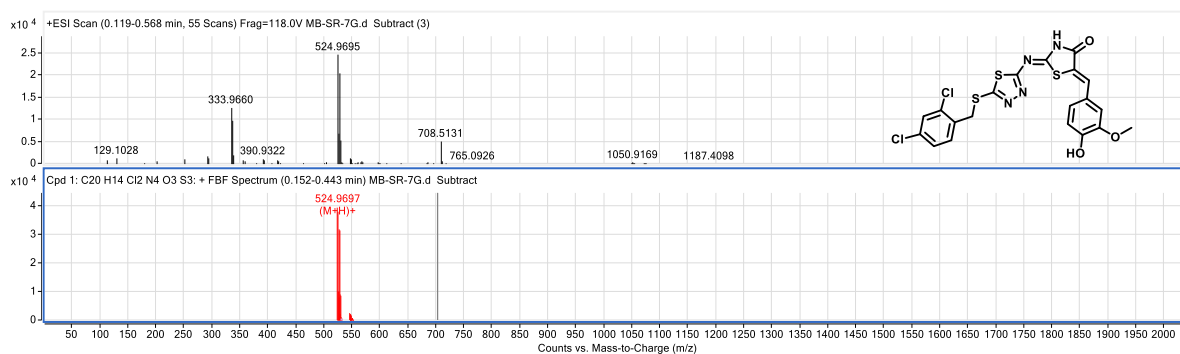

**S.F48: HRMS Compound 7g**

## X-Ray Crystallography of compounds 6g and 7f:

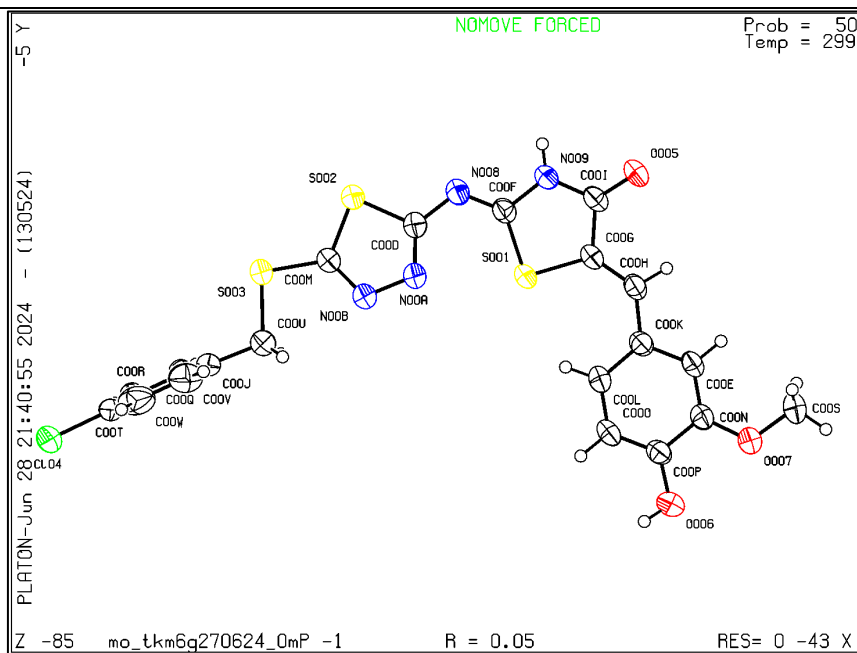

(6g)

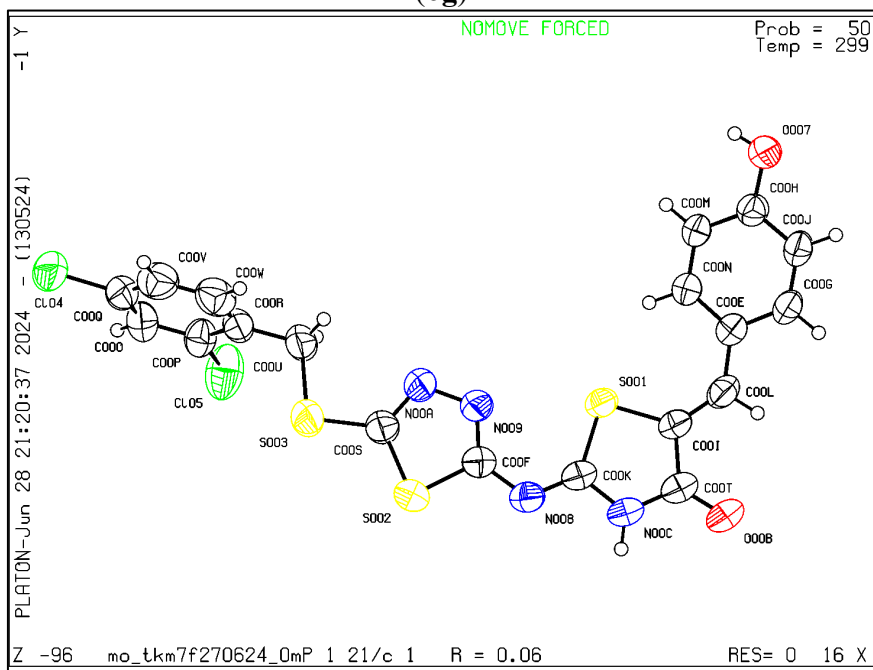

(7f)

S.F49: Molecular geometries of (a) 6g and (b) 7f in crystals.

**Table S1: Crystallographic table:**

| Complexes                                                                                                                                                                                                                                                                                       | 6g                                                                             | 7f                                                                                           |
|-------------------------------------------------------------------------------------------------------------------------------------------------------------------------------------------------------------------------------------------------------------------------------------------------|--------------------------------------------------------------------------------|----------------------------------------------------------------------------------------------|
| CCDC                                                                                                                                                                                                                                                                                            | 2366716                                                                        | 2366780                                                                                      |
| formula                                                                                                                                                                                                                                                                                         | C <sub>20</sub> H <sub>15</sub> ClN <sub>4</sub> O <sub>3</sub> S <sub>3</sub> | C <sub>19</sub> H <sub>12</sub> Cl <sub>2</sub> N <sub>4</sub> O <sub>2</sub> S <sub>3</sub> |
| fw                                                                                                                                                                                                                                                                                              | 490.99                                                                         | 495.41                                                                                       |
| crystal system                                                                                                                                                                                                                                                                                  | triclinic                                                                      | monoclinic                                                                                   |
| space group                                                                                                                                                                                                                                                                                     | P -1                                                                           | P 21/c                                                                                       |
| <i>a</i> (Å)                                                                                                                                                                                                                                                                                    | 10.270(2)                                                                      | 10.146(2)                                                                                    |
| <i>b</i> (Å)                                                                                                                                                                                                                                                                                    | 10.497(2)                                                                      | 17.022(5)                                                                                    |
| <i>c</i> (Å)                                                                                                                                                                                                                                                                                    | 13.887(3)                                                                      | 15.237(4)                                                                                    |
| $\alpha$ (°)                                                                                                                                                                                                                                                                                    | 73.266(7)                                                                      | 90                                                                                           |
| $\beta$ (°)                                                                                                                                                                                                                                                                                     | 81.446(7)                                                                      | 101.398(7)                                                                                   |
| $\gamma$ (°)                                                                                                                                                                                                                                                                                    | 85.763(6)                                                                      | 90                                                                                           |
| <i>V</i> (Å <sup>3</sup> )                                                                                                                                                                                                                                                                      | 1416.8(5)                                                                      | 2579.5(11)                                                                                   |
| <i>Z</i>                                                                                                                                                                                                                                                                                        | 2                                                                              | 4                                                                                            |
| <i>T</i> (K)                                                                                                                                                                                                                                                                                    | 299                                                                            | 299                                                                                          |
| D <sub>x</sub> , g cm <sup>-3</sup>                                                                                                                                                                                                                                                             | 1.275                                                                          | 1.477                                                                                        |
| $\mu$<br>(mm <sup>-1</sup> )                                                                                                                                                                                                                                                                    | 0.389                                                                          | 0.607                                                                                        |
| R1 <sup>a</sup> [I>2 $\sigma$ (I)]/GOF <sup>b</sup>                                                                                                                                                                                                                                             | 0.0514/<br>1.020                                                               | 0.0580/<br>1.026                                                                             |
| wR2 <sup>c</sup><br>(I>2 $\sigma$ (I))                                                                                                                                                                                                                                                          | 0.1689                                                                         | 0.1938                                                                                       |
| observation criterion: <sup>a</sup> R1 = $\Sigma  F_o - F_c  /\Sigma F_o $ . <sup>b</sup> GOF = $\{\Sigma[w(F_o^2-F_c^2)^2]/(n-p)\}^{1/2}$ ,<br><sup>c</sup> wR2 = $[\Sigma[w(F_o^2-F_c^2)^2]/\Sigma[w(F_o^2)^2]]^{1/2}$ where $w = 1/[\sigma^2(F_o^2) + (aP)^2+bP]$ , $P = (F_o^2+2F_c^2)/3$ . |                                                                                |                                                                                              |

## Biological assay data:

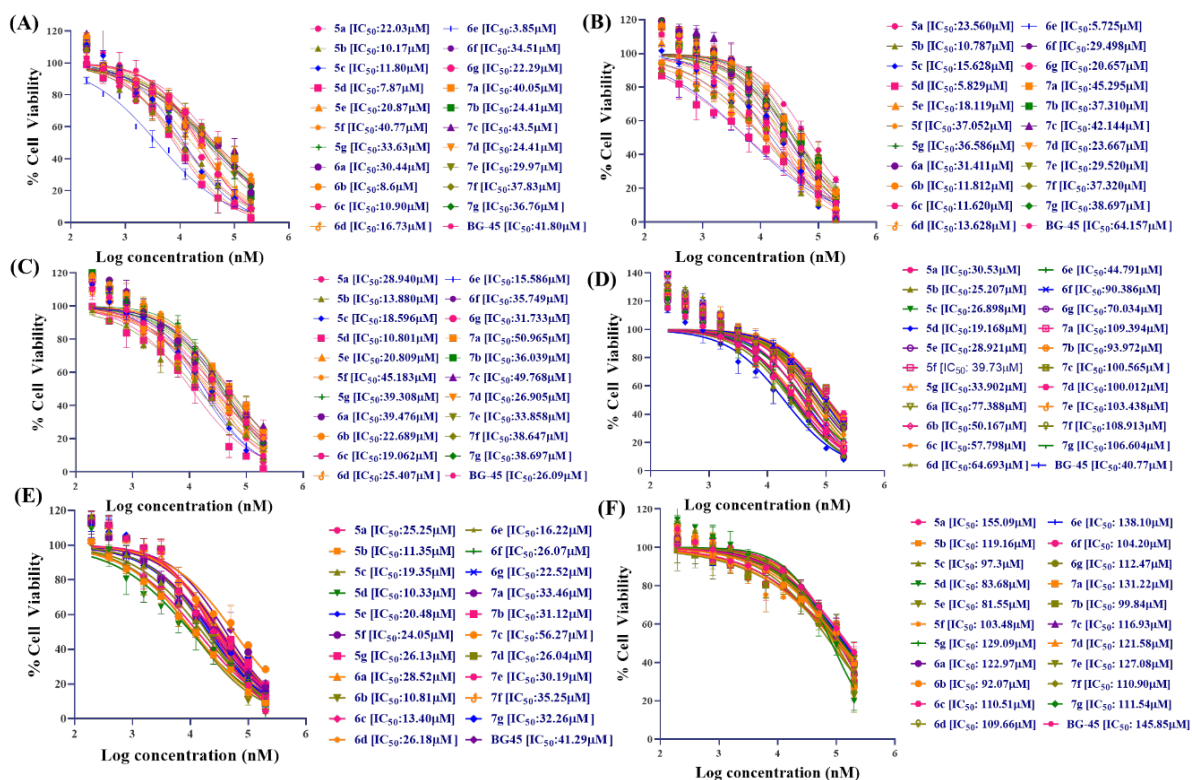

**S.F50:** Dose-response curve and IC<sub>50</sub> values of **5a-g**, **6a-g**, and **7a-g** series of compounds along with **BG45**. All compounds were tested in the concentrations range of 0.195 μM - 200 μM on (A) MCF-7, (B) PC3, (C) 4T1, (D) MOC2, (E) MDA-MB-231, and (F) HEK-293. Cells were treated with compounds for 48 h, and cell viability was measured using the *in vitro* MTT assay method. Data represents mean ± SD (n = 2) and is plotted in dose-response format. IC<sub>50</sub> was calculated using a nonlinear regression analysis method using GraphPad Prism 8.0.1.

**NB.** S. F: Supplementary Figure
